# Supplementary material for: Mixed phosphine/N-heterocyclic carbene palladium complexes: synthesis, characterization and catalytic use in aqueous Suzuki–Miyaura reactions
Source: Royal Society of Chemistry journal article supplement (doi:10.1039/c2dt32858e), 2013-01-01
Supplement: c2dt32858e.pdf [file c2dt32858e.pdf]

Supporting Information for

**Mixed Phosphine/*N*-Heterocyclic Carbene Palladium  
Complexes: Synthesis, Characterization and  
Catalytic use in Aqueous Suzuki-Miyaura Reactions**

*Thibault E. Schmid, Dale C. Jones, Olivier Songis, Olivier Diebolt, Marc R. L. Furst, Alexandra M. Z. Slawin  
and Catherine S. J. Cazin\**

EaStCHEM School of Chemistry, University of St Andrews, North Haugh, St Andrews, KY16 9ST, UK. Fax:  
+44 1334 463 808 Email: [cc111@st-andrews.ac.uk](mailto:cc111@st-andrews.ac.uk).

## Table of contents

|                                                                                                                                                                                            |            |
|--------------------------------------------------------------------------------------------------------------------------------------------------------------------------------------------|------------|
| <b>General Procedures</b>                                                                                                                                                                  | <b>S4</b>  |
| <b>NMR spectra of the complexes</b>                                                                                                                                                        | <b>S5</b>  |
| <sup>1</sup> H, <sup>31</sup> P- <sup>1</sup> H and <sup>13</sup> C- <sup>1</sup> H NMR spectra of [PdCl <sub>2</sub> (IPr){PPh <sub>3</sub> }] ( <b>2a</b> )                              | S5         |
| <sup>1</sup> H, <sup>31</sup> P- <sup>1</sup> H and <sup>13</sup> C- <sup>1</sup> H NMR spectra of [PdCl <sub>2</sub> (IPr){PCy <sub>3</sub> }] ( <b>2b</b> )                              | S7         |
| <sup>1</sup> H, <sup>31</sup> P- <sup>1</sup> H and <sup>13</sup> C- <sup>1</sup> H NMR spectra of [PdCl <sub>2</sub> (IPr){P( <i>o</i> -tolyl) <sub>3</sub> }] ( <b>2c</b> )              | S9         |
| <sup>1</sup> H, <sup>31</sup> P- <sup>1</sup> H and <sup>13</sup> C- <sup>1</sup> H NMR spectra of [PdCl <sub>2</sub> (IPr){P(1-Ad) <sub>2</sub> ( <sup><i>t</i></sup> Bu)}] ( <b>2d</b> ) | S10        |
| <sup>1</sup> H, <sup>31</sup> P- <sup>1</sup> H and <sup>13</sup> C- <sup>1</sup> H NMR spectra of [PdCl <sub>2</sub> (IPr){PCy <sub>2</sub> ( <i>o</i> -biphenyl)}] ( <b>2e</b> )         | S12        |
| <sup>1</sup> H, <sup>31</sup> P- <sup>1</sup> H and <sup>13</sup> C- <sup>1</sup> H NMR spectra of [PdCl <sub>2</sub> (IPr)(XPhos)] ( <b>2f</b> )                                          | S13        |
| <sup>1</sup> H, <sup>31</sup> P- <sup>1</sup> H and <sup>13</sup> C- <sup>1</sup> H NMR spectra of [PdCl <sub>2</sub> (IPr)(SPhos)] ( <b>2g</b> )                                          | S15        |
| <sup>1</sup> H, <sup>31</sup> P- <sup>1</sup> H and <sup>13</sup> C- <sup>1</sup> H NMR spectra of [Pd(μ-Cl)(Cl)(SPhos)] <sub>2</sub> ( <b>5</b> )                                         | S16        |
| <sup>1</sup> H, <sup>31</sup> P- <sup>1</sup> H and <sup>13</sup> C- <sup>1</sup> H NMR spectra of [Pd(IPr)(SPhos)] ( <b>6</b> )                                                           | S18        |
| <sup>1</sup> H NMR spectra of [PdCl <sub>2</sub> (IPr){P( <i>o</i> -tolyl) <sub>3</sub> }] ( <b>2c</b> ) at various temperatures (in C <sub>2</sub> D <sub>2</sub> Cl <sub>4</sub> )       | S20        |
| <sup>1</sup> H NMR spectra of [PdCl <sub>2</sub> (IPr){PCy <sub>2</sub> ( <i>o</i> -biphenyl)}] ( <b>2e</b> ) at various temperatures (in C <sub>2</sub> D <sub>2</sub> Cl <sub>4</sub> )  | S21        |
| <sup>1</sup> H NMR spectra stacking of [PdCl <sub>2</sub> (IPr)(XPhos)] ( <b>2f</b> ) at increasing temperatures (C <sub>2</sub> D <sub>2</sub> Cl <sub>4</sub> )                          | S22        |
| <b>Kinetic profiling for the Suzuki-Miyaura reaction mediated by 2g and 6</b>                                                                                                              | <b>S23</b> |
| <b>General procedure for the Suzuki-Miyaura reaction</b>                                                                                                                                   | <b>S23</b> |
| <b>Cross-coupling products (Scheme 3 entries)</b>                                                                                                                                          | <b>S24</b> |
| 4-Methylbiphenyl                                                                                                                                                                           | S24        |
| 3-Phenylanisole                                                                                                                                                                            | S24        |
| 2-Phenylanisole                                                                                                                                                                            | S25        |
| 4-Phenylanisole                                                                                                                                                                            | S25        |
| 2-Methylbiphenyl                                                                                                                                                                           | S26        |
| 2,6-Dimethylbiphenyl                                                                                                                                                                       | S26        |
| 9-Phenylanthracene                                                                                                                                                                         | S26        |
| 2,2'-Dimethylbiphenyl                                                                                                                                                                      | S27        |
| 2,2',6-Trimethylbiphenyl                                                                                                                                                                   | S27        |
| 2,2',4,6-Tetramethylbiphenyl                                                                                                                                                               | S28        |
| 2,4,6-Trimethyl-2'-methoxybiphenyl                                                                                                                                                         | S28        |
| 2- <i>o</i> -Tolylbiphenyl                                                                                                                                                                 | S28        |
| 2-Phenyl, 2'-methoxybiphenyl                                                                                                                                                               | S29        |
| 2-Phenyl, 4'-methylbiphenyl                                                                                                                                                                | S29        |
| 9-(2-Methoxyphenyl)-anthracene                                                                                                                                                             | S30        |
| 9-( <i>o</i> -Biphenyl)anthracene                                                                                                                                                          | S30        |
| 2-Phenylpyridine                                                                                                                                                                           | S31        |
| 3-Phenylpyridine                                                                                                                                                                           | S31        |
| Diphenylmethane                                                                                                                                                                            | S31        |
| 4-Formyl-1,1'-biphenyl                                                                                                                                                                     | S32        |
| 4-Phenyl-7-(trifluoromethyl)quinoline                                                                                                                                                      | S32        |
| <b>NMR spectra of products</b>                                                                                                                                                             | <b>S34</b> |
| <sup>1</sup> H and <sup>13</sup> C- <sup>1</sup> H NMR spectra of 4-methylbiphenyl                                                                                                         | S34        |
| <sup>1</sup> H and <sup>13</sup> C- <sup>1</sup> H NMR spectra of 3-phenylanisole                                                                                                          | S35        |
| <sup>1</sup> H and <sup>13</sup> C- <sup>1</sup> H NMR spectra of 2-phenylanisole                                                                                                          | S36        |
| <sup>1</sup> H and <sup>13</sup> C- <sup>1</sup> H NMR spectra of 4-phenylanisole                                                                                                          | S37        |
| <sup>1</sup> H and <sup>13</sup> C- <sup>1</sup> H NMR spectra of 2-methylbiphenyl                                                                                                         | S38        |
| <sup>1</sup> H and <sup>13</sup> C- <sup>1</sup> H NMR spectra of 2,6-dimethylbiphenyl                                                                                                     | S39        |
| <sup>1</sup> H and <sup>13</sup> C- <sup>1</sup> H NMR spectra of 9-phenylanthracene                                                                                                       | S40        |
| <sup>1</sup> H and <sup>13</sup> C- <sup>1</sup> H NMR spectra of 2,2'-dimethylbiphenyl                                                                                                    | S41        |
| <sup>1</sup> H and <sup>13</sup> C- <sup>1</sup> H NMR Spectra of 2,2',6-trimethylbiphenyl                                                                                                 | S42        |
| <sup>1</sup> H and <sup>13</sup> C- <sup>1</sup> H NMR spectra of 2,2',4,6-tetramethylbiphenyl                                                                                             | S43        |
| <sup>1</sup> H and <sup>13</sup> C- <sup>1</sup> H NMR spectra of 2,4,6-trimethyl-2'-methoxybiphenyl                                                                                       | S44        |
| <sup>1</sup> H and <sup>13</sup> C- <sup>1</sup> H NMR Spectra of 2- <i>o</i> -tolylbiphenyl                                                                                               | S45        |
| <sup>1</sup> H and <sup>13</sup> C- <sup>1</sup> H NMR spectra of 2-phenyl-2'-methoxybiphenyl                                                                                              | S46        |
| <sup>1</sup> H and <sup>13</sup> C- <sup>1</sup> H NMR spectra of 2-phenyl,4'-methylbiphenyl                                                                                               | S47        |
| <sup>1</sup> H and <sup>13</sup> C- <sup>1</sup> H NMR spectra of 9-(2-methoxyphenyl)anthracene                                                                                            | S48        |
| <sup>1</sup> H and <sup>13</sup> C- <sup>1</sup> H NMR spectra of 9-( <i>o</i> -biphenyl)anthracene                                                                                        | S49        |
| <sup>1</sup> H and <sup>13</sup> C- <sup>1</sup> H NMR spectra of 2-phenylpyridine                                                                                                         | S50        |
| <sup>1</sup> H and <sup>13</sup> C- <sup>1</sup> H NMR spectra of 3-phenylpyridine                                                                                                         | S51        |
| <sup>1</sup> H and <sup>13</sup> C- <sup>1</sup> H NMR spectra of diphenylmethane                                                                                                          | S52        |
| <sup>1</sup> H and <sup>13</sup> C- <sup>1</sup> H NMR spectra of 4-formyl-1,1'-biphenyl                                                                                                   | S53        |
| <sup>1</sup> H and <sup>13</sup> C- <sup>1</sup> H NMR spectra of 4-phenyl-7-(trifluoromethyl)quinoline                                                                                    | S54        |

|                                                                                                                                                             |            |
|-------------------------------------------------------------------------------------------------------------------------------------------------------------|------------|
| <b>Crystal data and structure refinement</b>                                                                                                                | <b>S55</b> |
| [PdCl <sub>2</sub> (IPr){PPh <sub>3</sub> }] ( <b>2a</b> )                                                                                                  | S55        |
| [PdCl <sub>2</sub> (IPr){PCy <sub>3</sub> }] ( <b>2b</b> )                                                                                                  | S56        |
| [PdCl <sub>2</sub> (IPr){P( <i>o</i> -tolyl) <sub>3</sub> }] ( <b>2c</b> )                                                                                  | S57        |
| [PdCl <sub>2</sub> (IPr){P("Bu)(1-Ad) <sub>2</sub> }]·0.5CH <sub>2</sub> Cl <sub>2</sub> ( <b>2d</b> )                                                      | S58        |
| [PdCl <sub>2</sub> (IPr){PCy <sub>2</sub> ( <i>o</i> -biphenyl)}] ( <b>2e</b> )                                                                             | S59        |
| [PdCl <sub>2</sub> (IPr)(XPhos)]·1.5CH <sub>2</sub> Cl <sub>2</sub> ( <b>2f</b> )                                                                           | S60        |
| [PdCl <sub>2</sub> (IPr)(SPhos)] ( <b>2g</b> )                                                                                                              | S61        |
| [Pd( $\mu$ -Cl)(Cl)(SPhos)] <sub>2</sub> ( <b>5</b> )                                                                                                       | S62        |
| [Pd(IPr)(SPhos)] ( <b>6</b> )                                                                                                                               | S63        |
| <b>%V<sub>Bur</sub> and topographical steric maps calculated using SambVca</b>                                                                              | <b>S64</b> |
| General considerations                                                                                                                                      | S64        |
| %V <sub>Bur</sub> of IPr in the complex [PdCl <sub>2</sub> (IPr){PPh <sub>3</sub> }] ( <b>2a</b> )                                                          | S64        |
| Steric map of IPr in the complex [PdCl <sub>2</sub> (IPr){PPh <sub>3</sub> }] ( <b>2a</b> )                                                                 | S65        |
| %V <sub>Bur</sub> of PPh <sub>3</sub> in the complex [PdCl <sub>2</sub> (IPr){PPh <sub>3</sub> }] ( <b>2a</b> )                                             | S65        |
| Steric map of PPh <sub>3</sub> in the complex [PdCl <sub>2</sub> (IPr){PPh <sub>3</sub> }] ( <b>2a</b> )                                                    | S66        |
| %V <sub>Bur</sub> of IPr in the complex [PdCl <sub>2</sub> (IPr){PCy <sub>3</sub> }] ( <b>2b</b> )                                                          | S67        |
| Steric map of IPr in the complex [PdCl <sub>2</sub> (IPr){PCy <sub>3</sub> }] ( <b>2b</b> )                                                                 | S68        |
| %V <sub>Bur</sub> of PCy <sub>3</sub> in the complex [PdCl <sub>2</sub> (IPr){PCy <sub>3</sub> }] ( <b>2b</b> )                                             | S68        |
| Steric map of PCy <sub>3</sub> in the complex [PdCl <sub>2</sub> (IPr){PCy <sub>3</sub> }] ( <b>2b</b> )                                                    | S69        |
| %V <sub>Bur</sub> of IPr in the complex [PdCl <sub>2</sub> (IPr){P( <i>o</i> -tolyl) <sub>3</sub> }] ( <b>2c</b> )                                          | S70        |
| Steric map of IPr in the complex [PdCl <sub>2</sub> (IPr){P( <i>o</i> -tolyl) <sub>3</sub> }] ( <b>2c</b> )                                                 | S70        |
| %V <sub>Bur</sub> of P( <i>o</i> -tolyl) <sub>3</sub> in the complex [PdCl <sub>2</sub> (IPr){P( <i>o</i> -tolyl) <sub>3</sub> }] ( <b>2c</b> )             | S71        |
| Steric map of P( <i>o</i> -tolyl) <sub>3</sub> in the complex [PdCl <sub>2</sub> (IPr){P( <i>o</i> -tolyl) <sub>3</sub> }] ( <b>2c</b> )                    | S72        |
| %V <sub>Bur</sub> of IPr in the complex [PdCl <sub>2</sub> (IPr){P(1-Ad) <sub>2</sub> ("Bu)}] ( <b>2d</b> )                                                 | S73        |
| Steric map of IPr in the complex [PdCl <sub>2</sub> (IPr){P(1-Ad) <sub>2</sub> ("Bu)}] ( <b>2d</b> )                                                        | S74        |
| %V <sub>Bur</sub> of P(1-Ad) <sub>2</sub> ("Bu) in the complex [PdCl <sub>2</sub> (IPr){P(1-Ad) <sub>2</sub> ("Bu)}] ( <b>2d</b> )                          | S74        |
| Steric map of P(1-Ad) <sub>2</sub> ("Bu) in the complex [PdCl <sub>2</sub> (IPr){P(1-Ad) <sub>2</sub> ("Bu)}] ( <b>2d</b> )                                 | S75        |
| %V <sub>Bur</sub> of IPr in the complex [PdCl <sub>2</sub> (IPr){PCy <sub>2</sub> ( <i>o</i> -biphenyl)}] ( <b>2e</b> )                                     | S76        |
| Steric map of IPr in the complex [PdCl <sub>2</sub> (IPr){PCy <sub>2</sub> ( <i>o</i> -biphenyl)}] ( <b>2e</b> )                                            | S77        |
| %V <sub>Bur</sub> of P(Cy <sub>2</sub> ( <i>o</i> -biphenyl) in the complex [PdCl <sub>2</sub> (IPr){PCy <sub>2</sub> ( <i>o</i> -biphenyl)}] ( <b>2e</b> ) | S77        |
| Steric map of PCy <sub>2</sub> ( <i>o</i> -biphenyl) in the complex [PdCl <sub>2</sub> (IPr){PCy <sub>2</sub> ( <i>o</i> -biphenyl)}] ( <b>2e</b> )         | S78        |
| %V <sub>Bur</sub> of IPr in the complex [PdCl <sub>2</sub> (IPr)(XPhos)] ( <b>2f</b> )                                                                      | S79        |
| Steric map of IPr in the complex [PdCl <sub>2</sub> (IPr)(XPhos)] ( <b>2f</b> )                                                                             | S80        |
| %V <sub>Bur</sub> of XPhos in the complex [PdCl <sub>2</sub> (IPr)(XPhos)] ( <b>2f</b> )                                                                    | S80        |
| Steric map of XPhos in the complex [PdCl <sub>2</sub> (IPr)(XPhos)] ( <b>2f</b> )                                                                           | S81        |
| %V <sub>Bur</sub> of IPr in the complex [PdCl <sub>2</sub> (IPr)(SPhos)] ( <b>2g</b> )                                                                      | S82        |
| Steric map of IPr in the complex [PdCl <sub>2</sub> (IPr)(SPhos)] ( <b>2g</b> )                                                                             | S83        |
| %V <sub>Bur</sub> of SPhos in the complex [PdCl <sub>2</sub> (IPr)(SPhos)] ( <b>2g</b> )                                                                    | S83        |
| Steric map of SPhos in the complex [PdCl <sub>2</sub> (IPr)(SPhos)] ( <b>2g</b> )                                                                           | S84        |
| %V <sub>Bur</sub> of IPr [Pd(IPr)(SPhos)] ( <b>6</b> )                                                                                                      | S85        |
| Steric map of IPr [Pd(IPr)(SPhos)] ( <b>6</b> )                                                                                                             | S86        |
| %V <sub>Bur</sub> of SPhos of [Pd(IPr)(SPhos)] ( <b>6</b> )                                                                                                 | S86        |
| Steric map of SPhos of [Pd(IPr)(SPhos)] ( <b>6</b> )                                                                                                        | S87        |
| <b>References</b>                                                                                                                                           | <b>S88</b> |

## General Procedures

All reactions were performed under an inert atmosphere of argon or nitrogen using standard Schlenk line and glovebox techniques. Solvents were purchased and used as received. Flash column chromatography was performed on silica gel 60 (230-400 mesh).  $^1\text{H}$ ,  $^{13}\text{C}$ - $\{^1\text{H}\}$  and  $^{31}\text{P}$ - $\{^1\text{H}\}$  Nuclear Magnetic Resonance (NMR) spectra were recorded on a Bruker AC300 or on a Bruker Advance 400 Ultrashield spectrometer between 298 K and 373 K, Gas chromatography (GC) analyses were performed on an Agilent 7890A apparatus equipped with a flame ionization detector and a (5%-phenyl)-methylpolysiloxane column (30 m, 320  $\mu\text{m}$ , film: 0.25  $\mu\text{m}$ ). All Reagents were purchased and used as received. HRMS samples were submitted to EPSRC National Mass Spectrometry Service Centre (<http://www.swan.ac.uk/nmssc/index.html>). Elemental analyses were performed by the London Metropolitan University Service.

## NMR spectra of the complexes

$^1\text{H}$ ,  $^{31}\text{P}$ - $\{^1\text{H}\}$  and  $^{13}\text{C}$ - $\{^1\text{H}\}$  NMR spectra of  $[\text{PdCl}_2(\text{IPr})\{\text{PPh}_3\}]$  (2a)

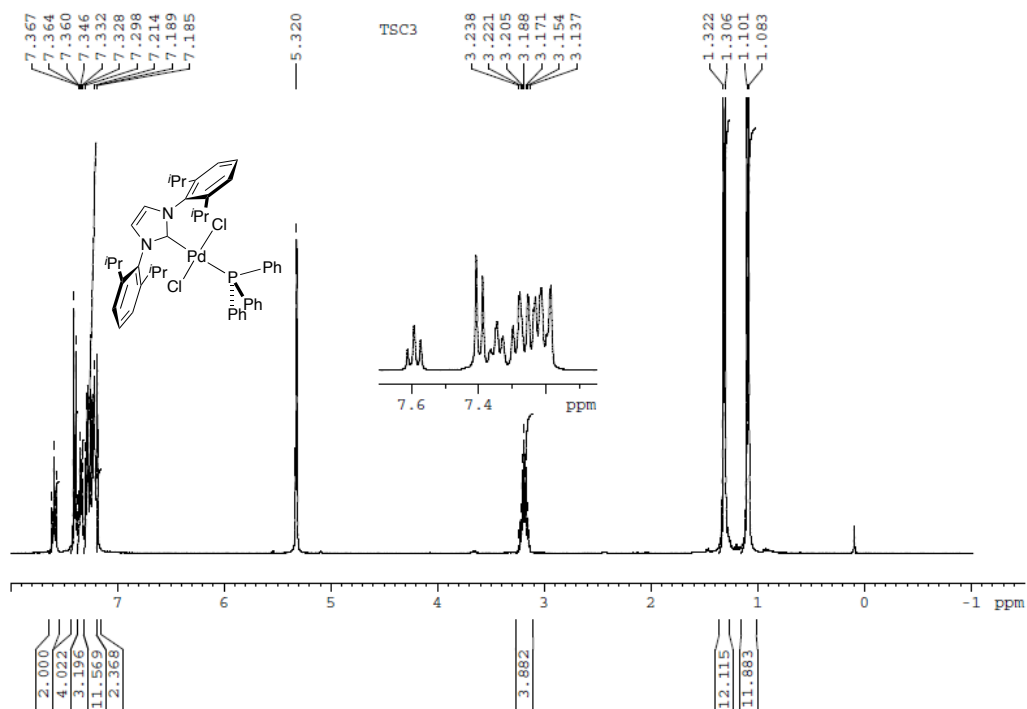

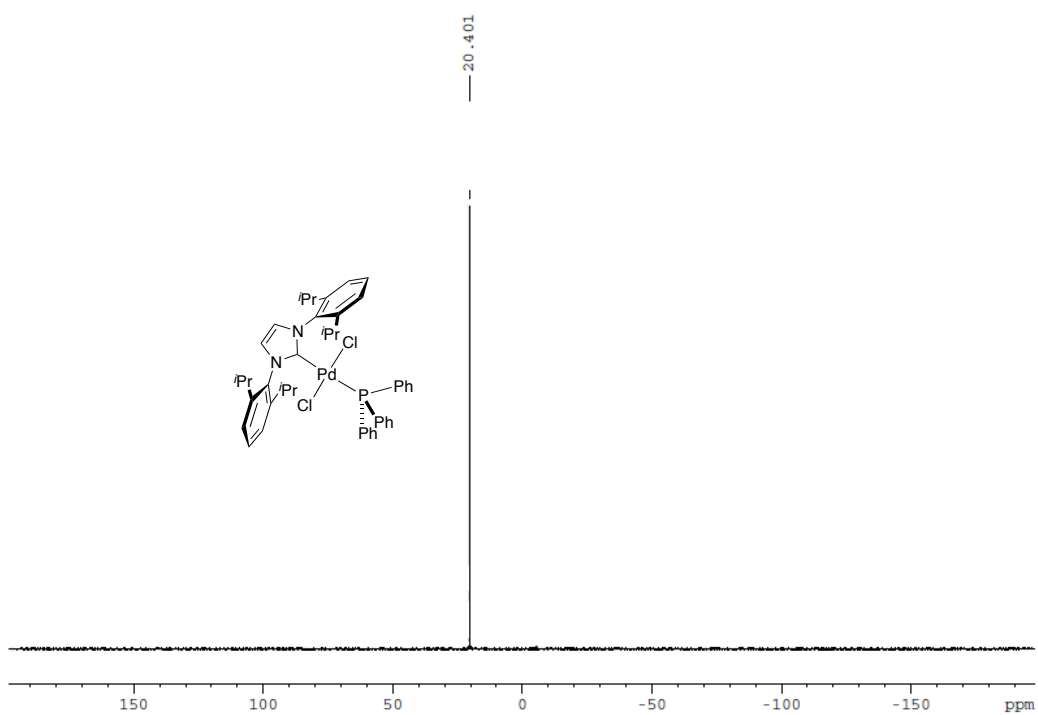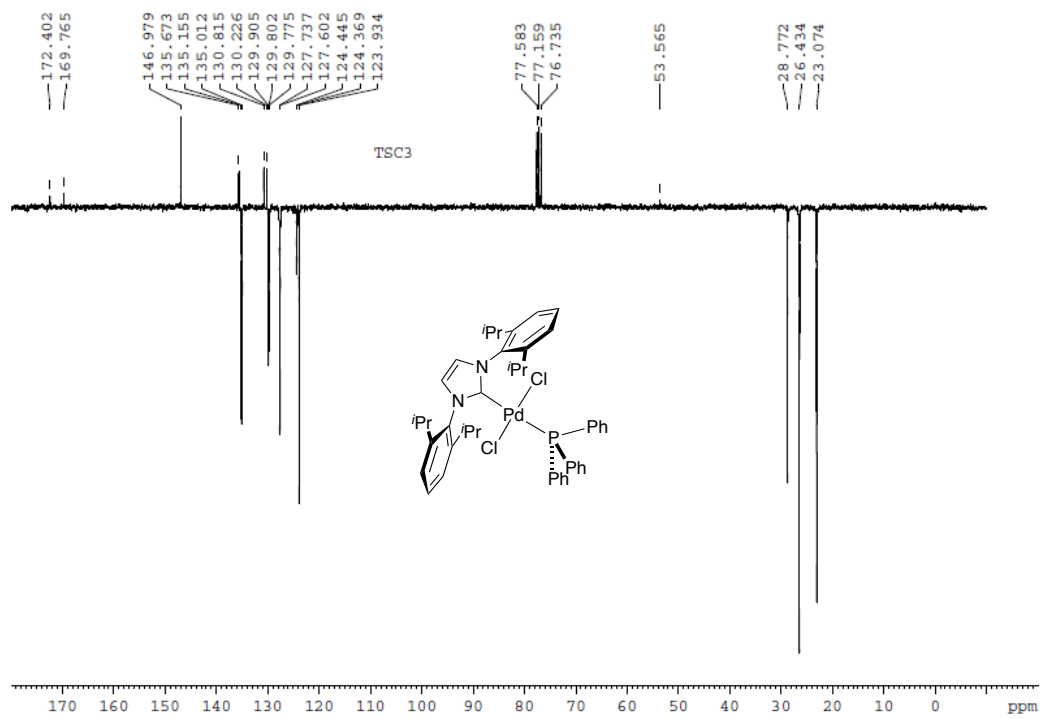

### $^1\text{H}$ , $^{31}\text{P}$ - $\{^1\text{H}\}$ and $^{13}\text{C}$ - $\{^1\text{H}\}$ NMR spectra of $[\text{PdCl}_2(\text{IPr})\{\text{PCy}_3\}_3]$ (**2b**)

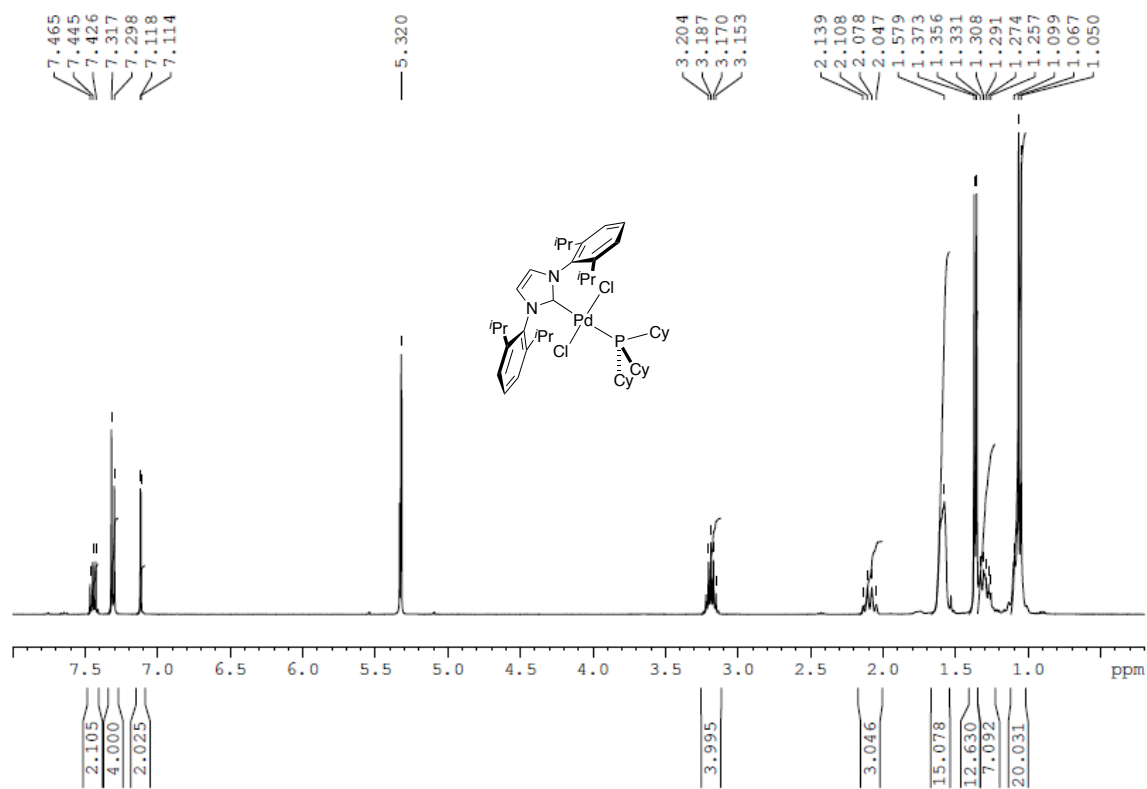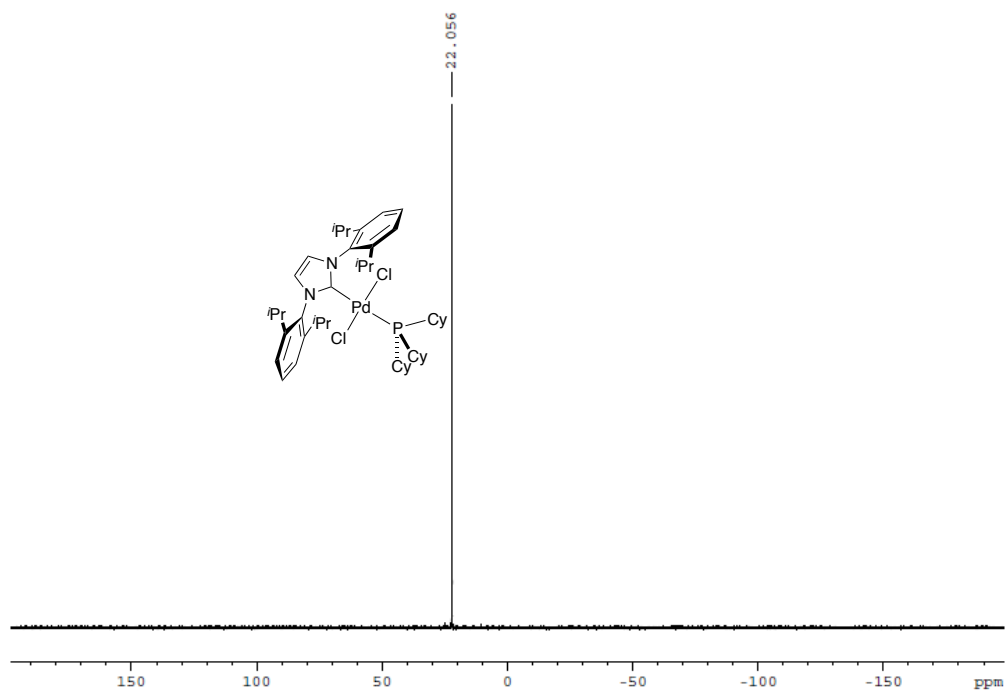

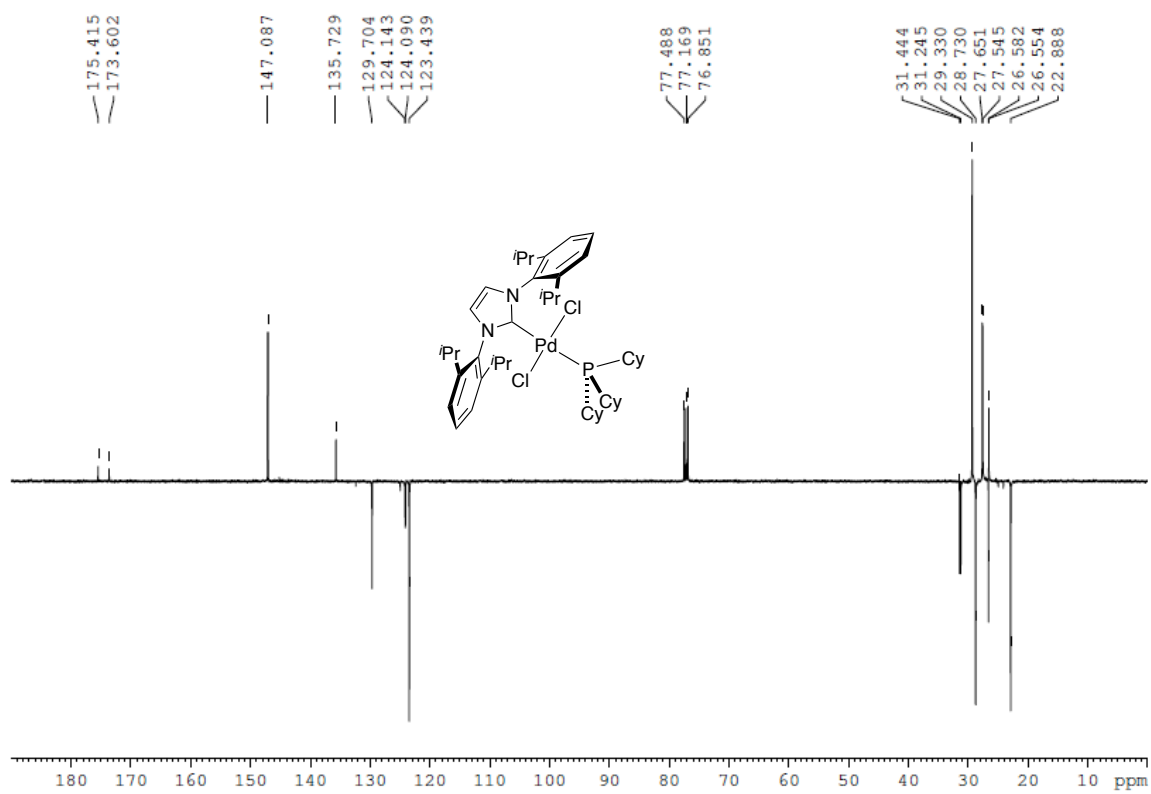



$^1\text{H}$ ,  $^{31}\text{P}$ - $\{^1\text{H}\}$  and  $^{13}\text{C}$ - $\{^1\text{H}\}$  NMR spectra of  $[\text{PdCl}_2(\text{IPr})\{\text{P}(o\text{-tolyl})_3\}]$  (**2c**)

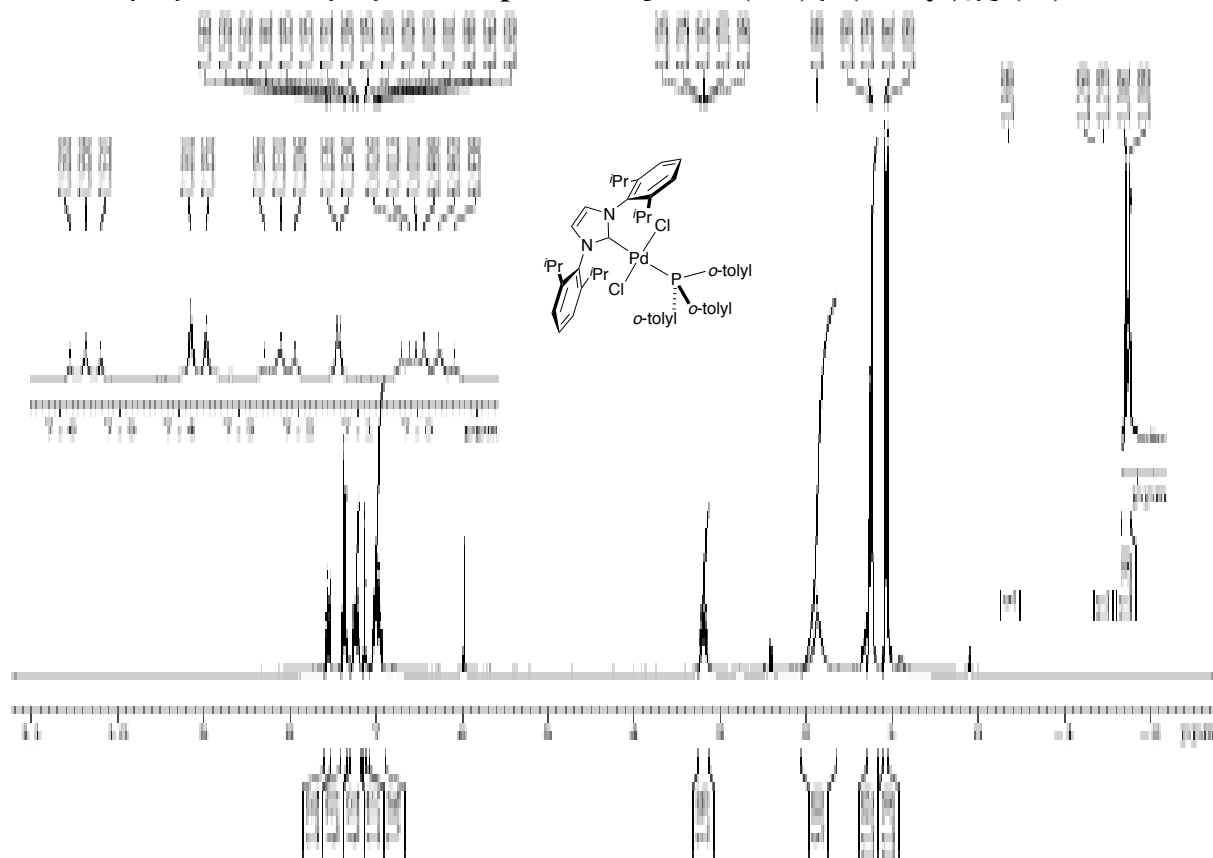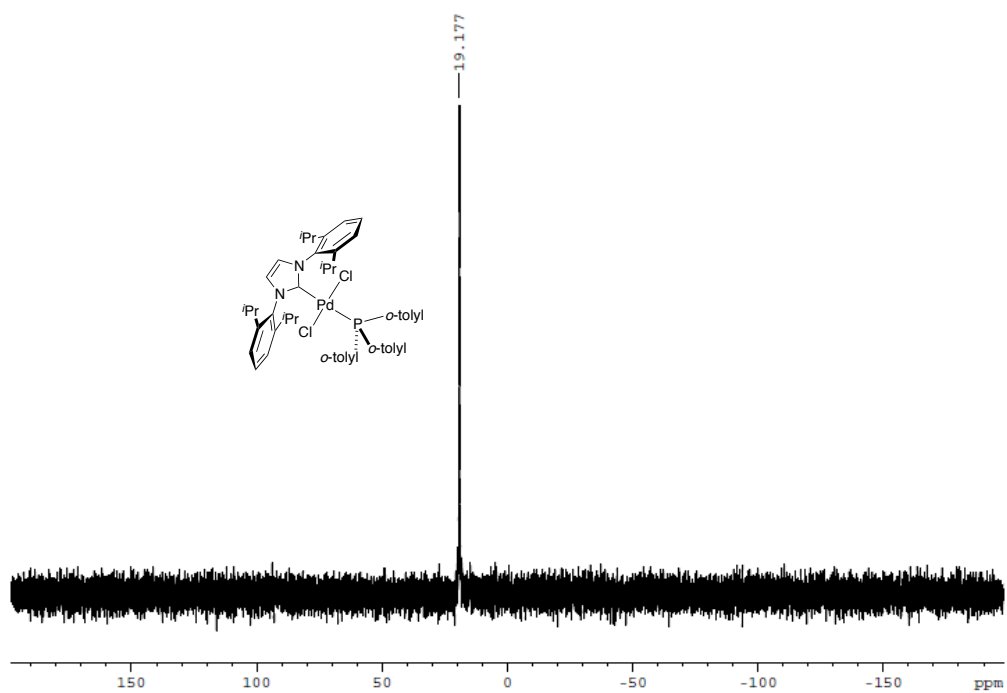

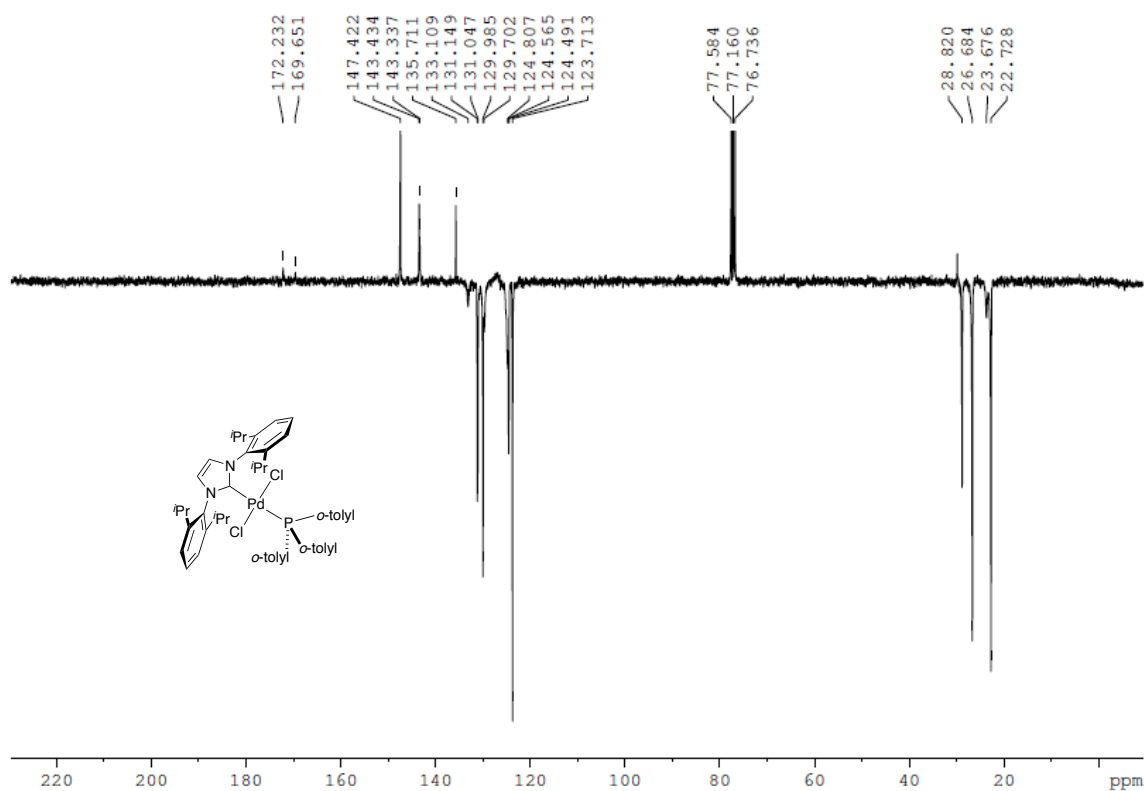

<sup>1</sup>H, <sup>31</sup>P-{<sup>1</sup>H} and <sup>13</sup>C-{<sup>1</sup>H} NMR spectra of [PdCl<sub>2</sub>(IPr){P(1-Ad)<sub>2</sub>(<sup>n</sup>Bu)}] (2d)

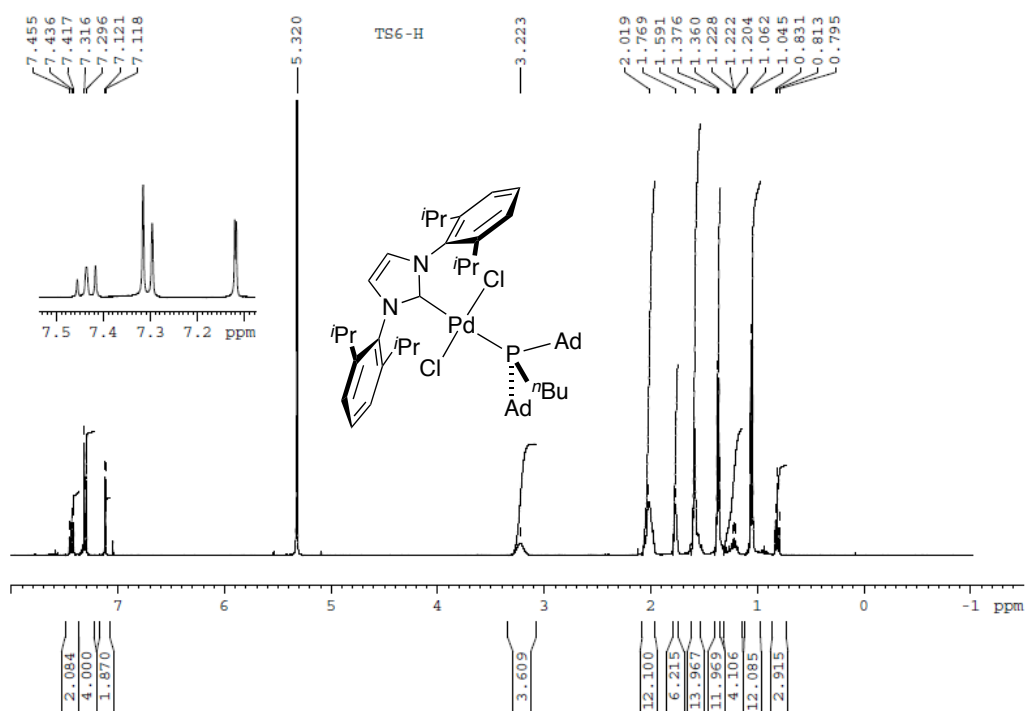

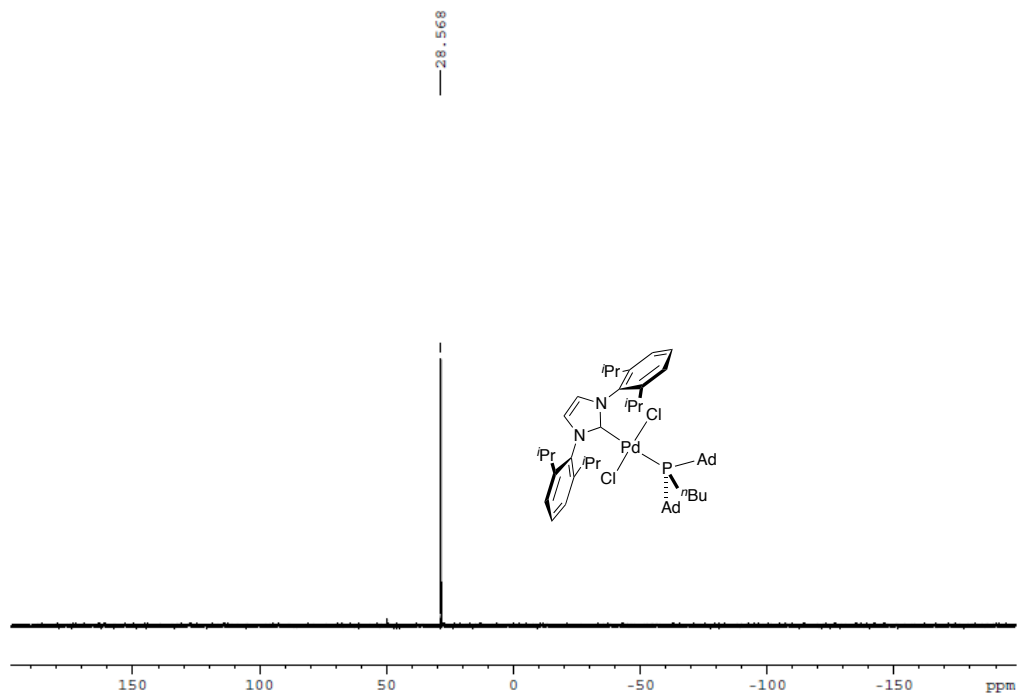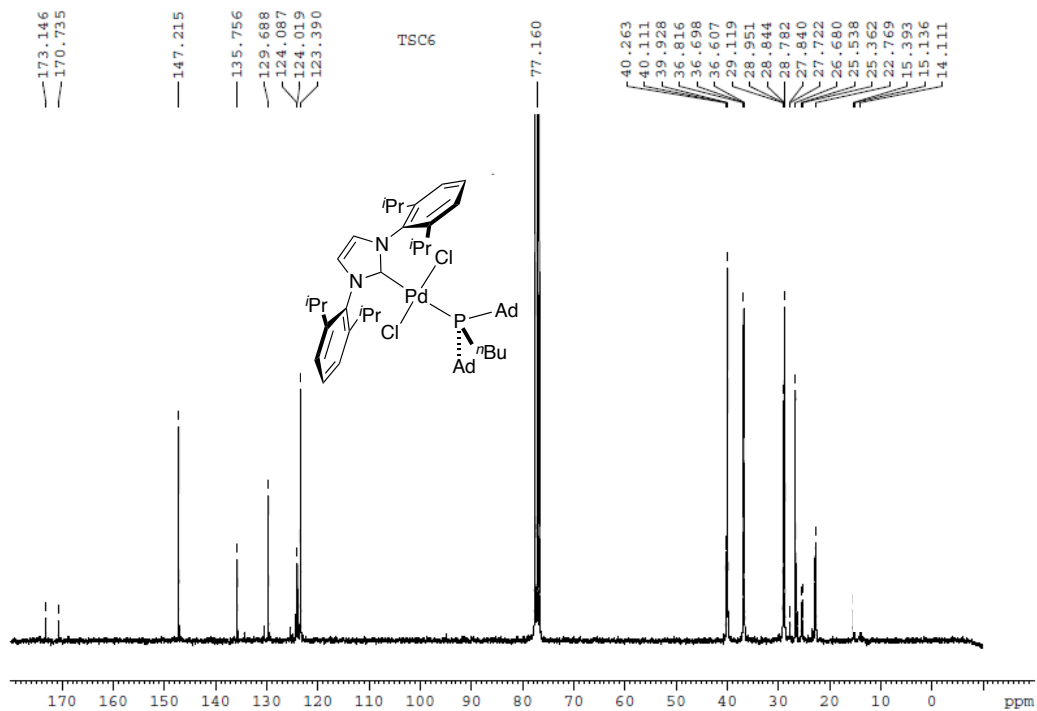

### $^1\text{H}$ , $^{31}\text{P}$ - $\{^1\text{H}\}$ and $^{13}\text{C}$ - $\{^1\text{H}\}$ NMR spectra of $[\text{PdCl}_2(\text{IPr})\{\text{PCy}_2(o\text{-biphenyl})\}]$ (**2e**)

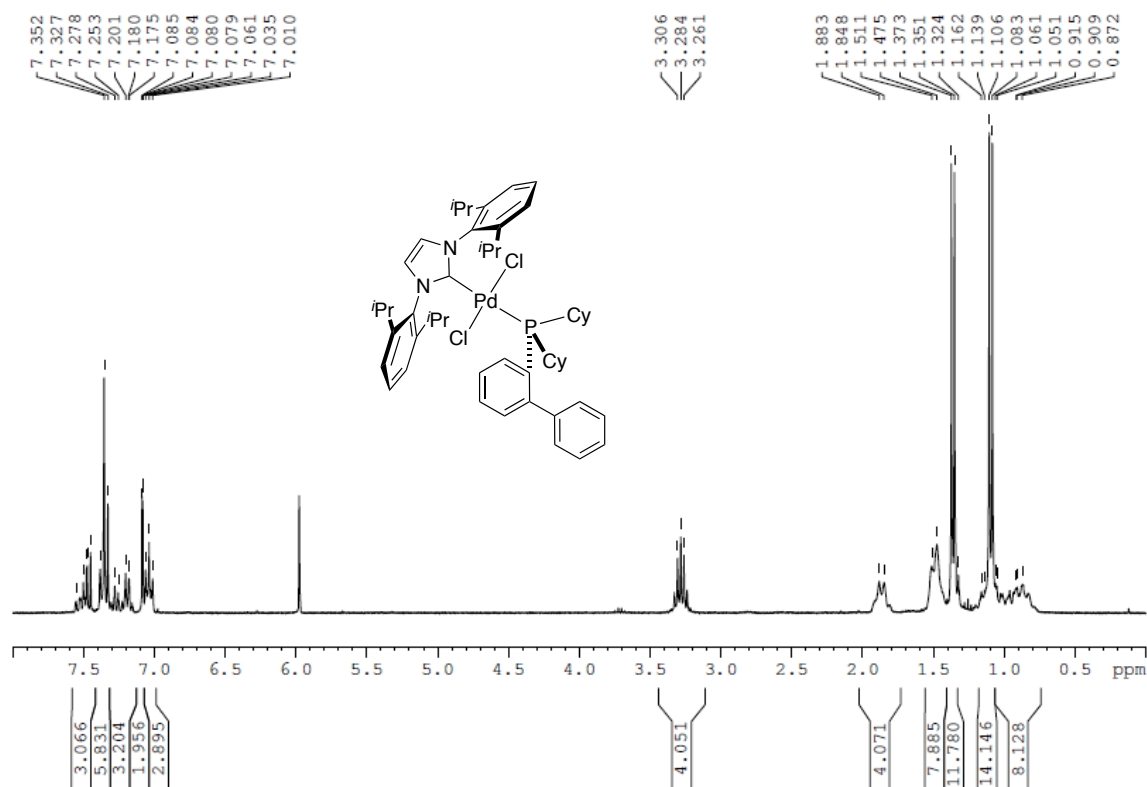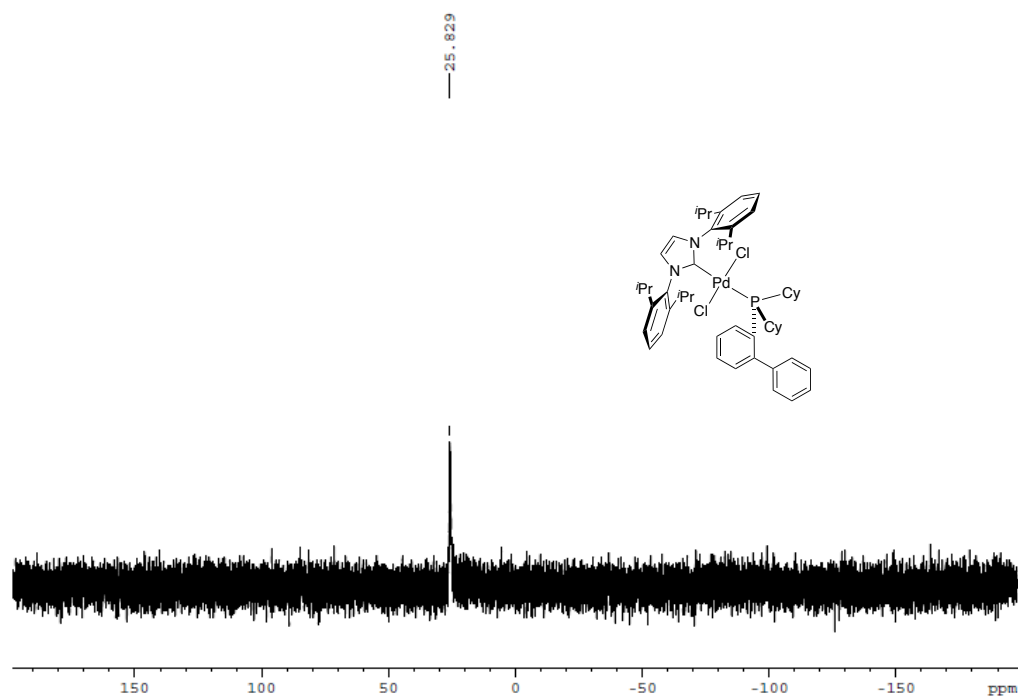

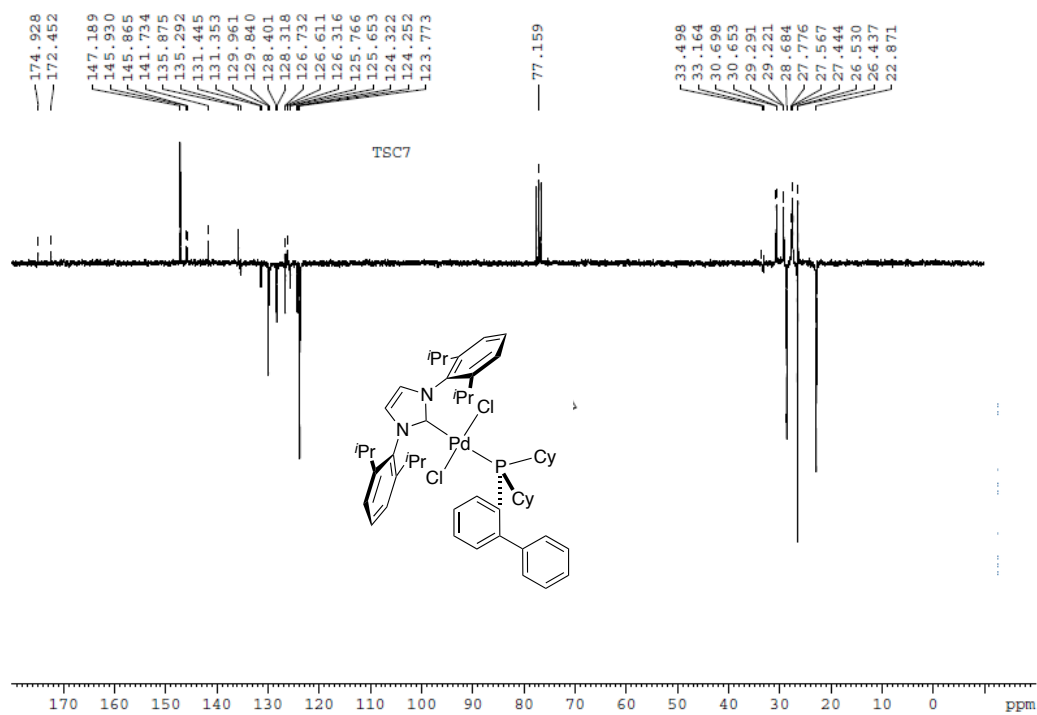

**<sup>1</sup>H, <sup>31</sup>P-{<sup>1</sup>H} and <sup>13</sup>C-{<sup>1</sup>H} NMR spectra of [PdCl<sub>2</sub>(IPr)(XPhos)] (2f)**

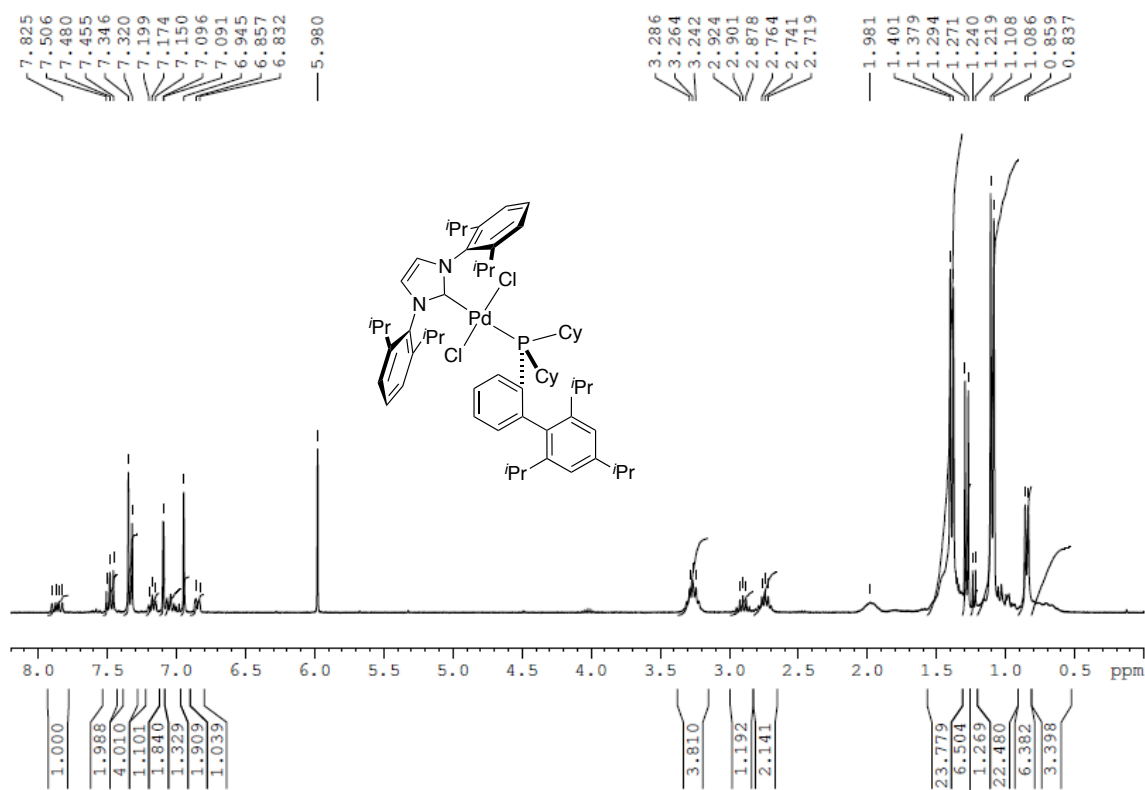

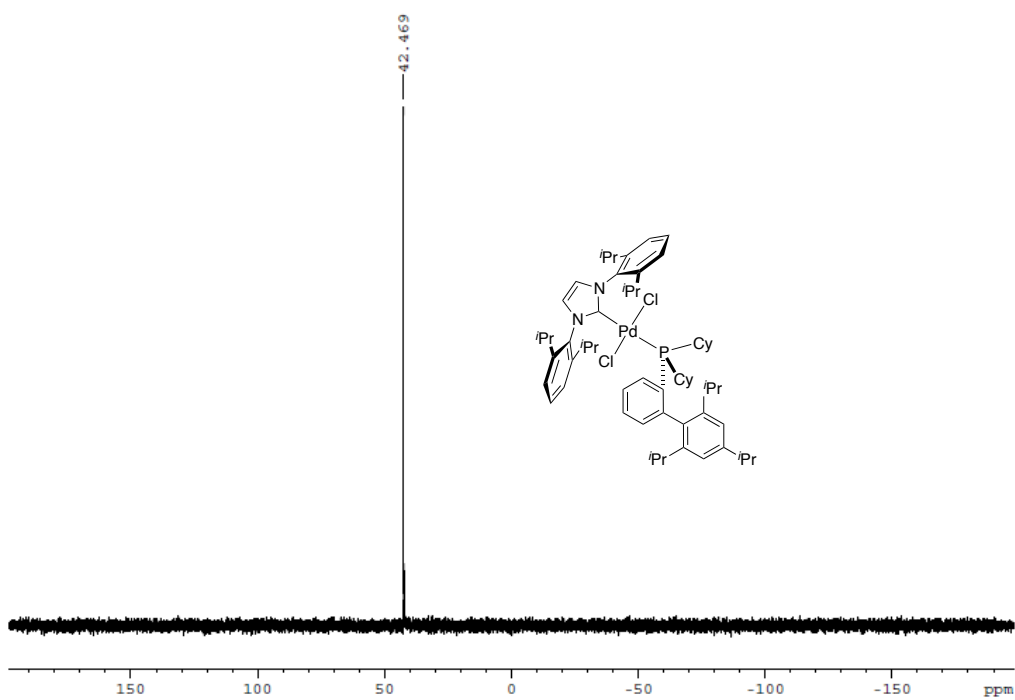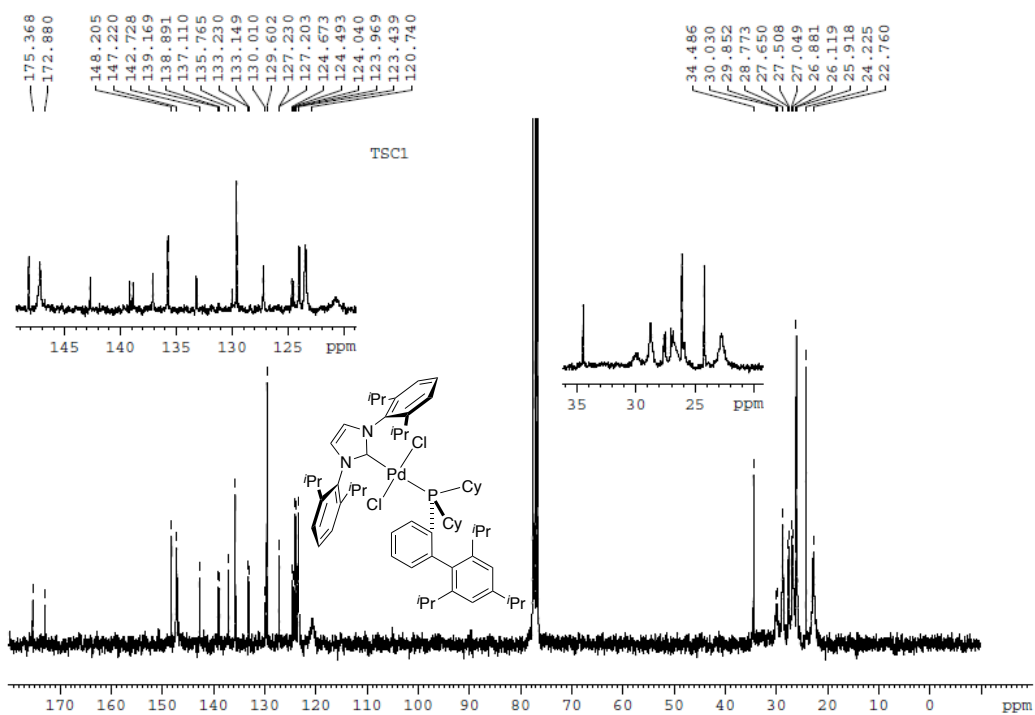

### $^1\text{H}$ , $^{31}\text{P}$ - $\{^1\text{H}\}$ and $^{13}\text{C}$ - $\{^1\text{H}\}$ NMR spectra of $[\text{PdCl}_2(\text{IPr})(\text{SPhos})]$ (2g)

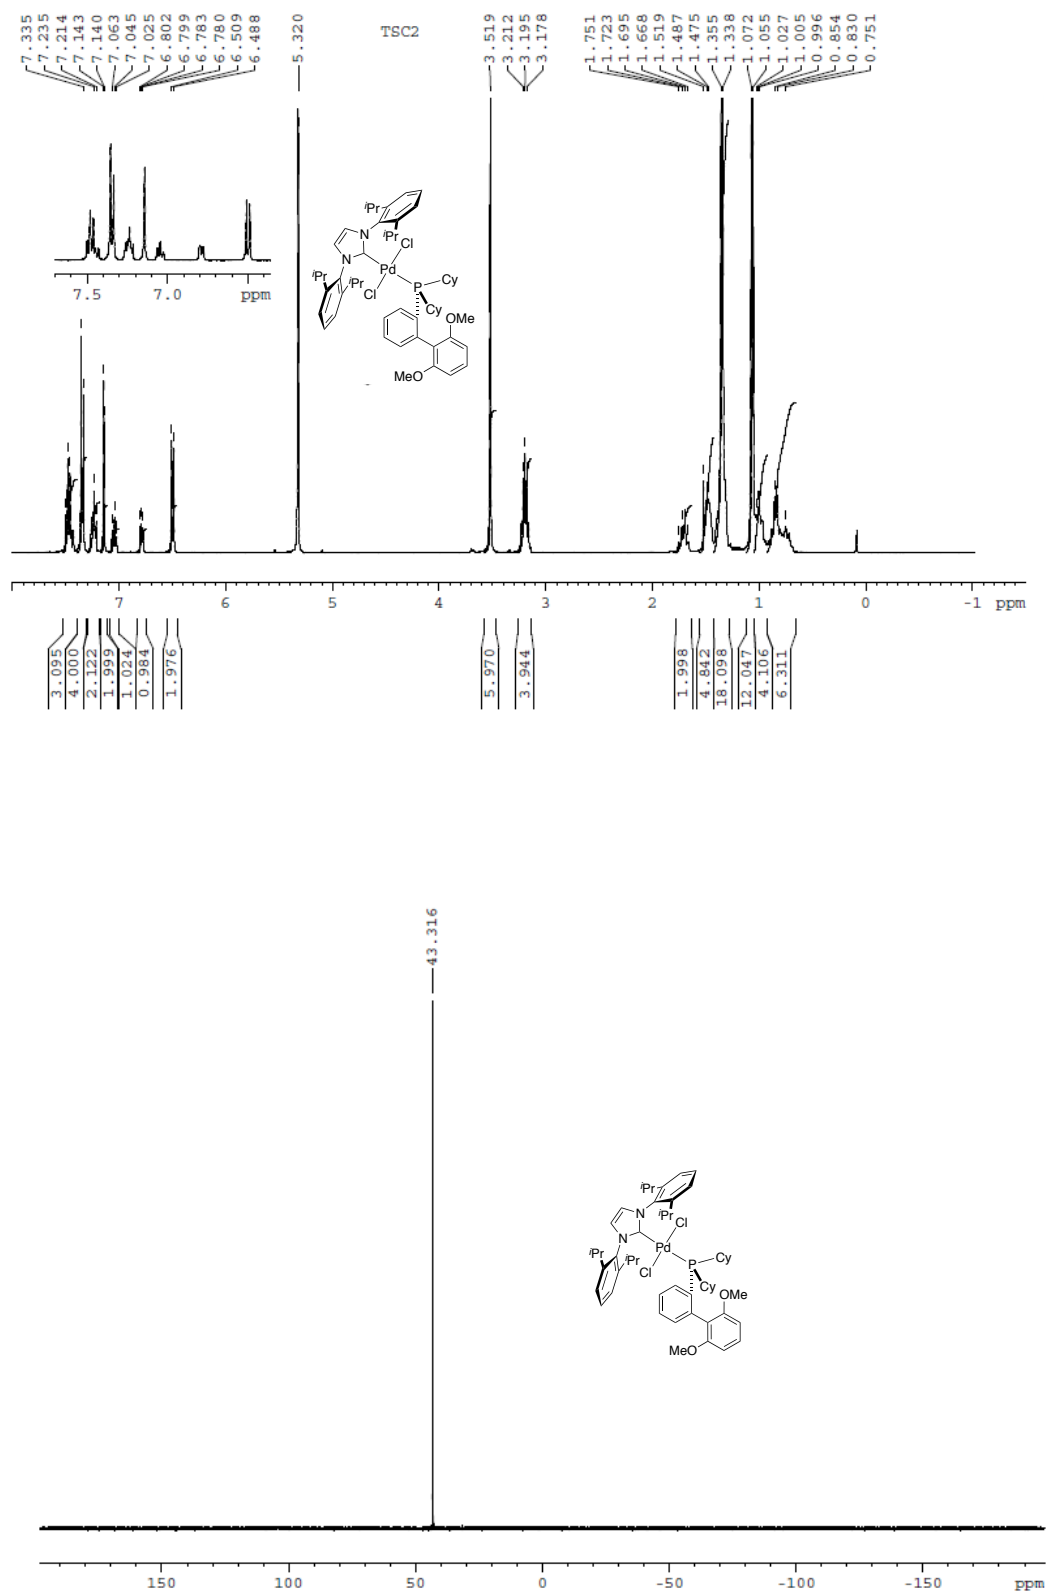

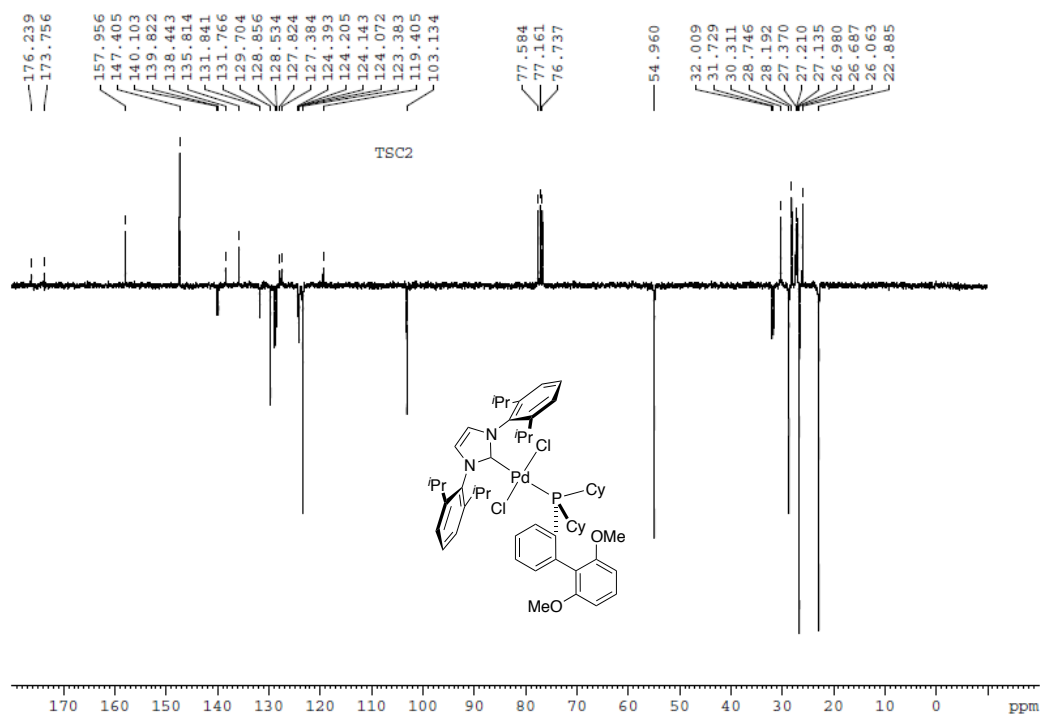

<sup>1</sup>H, <sup>31</sup>P-<sup>1</sup>H and <sup>13</sup>C-<sup>1</sup>H NMR spectra of [Pd(μ-Cl)(Cl)(SPhos)]<sub>2</sub> (5)

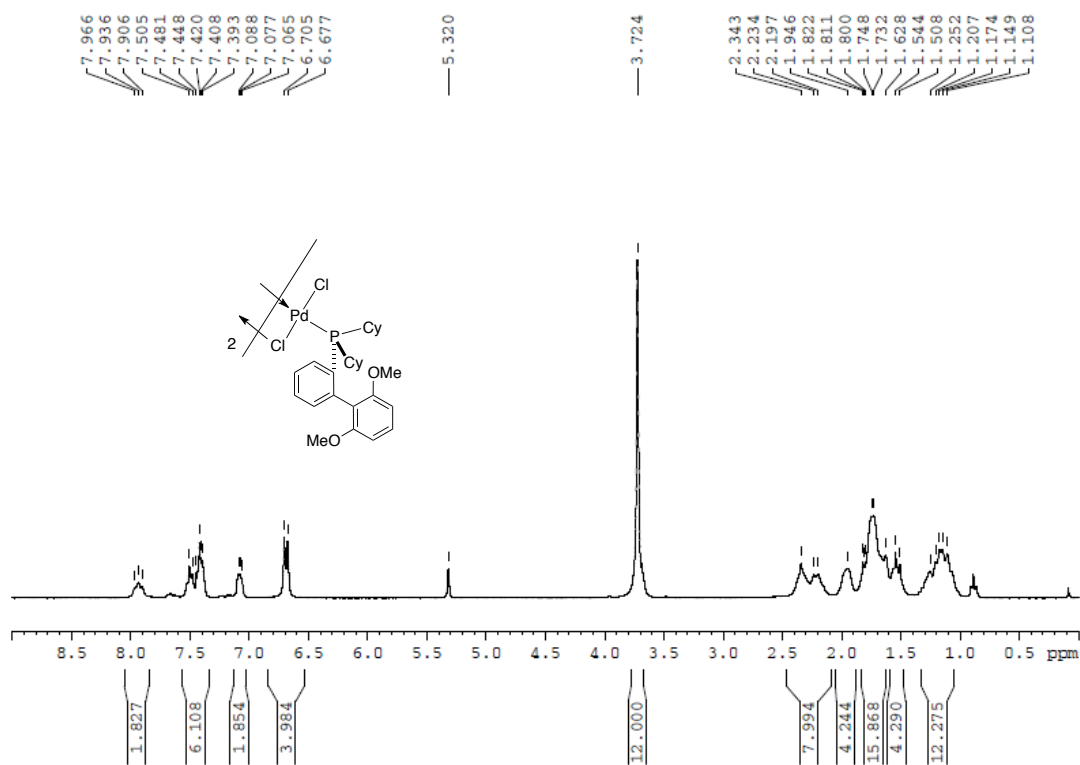



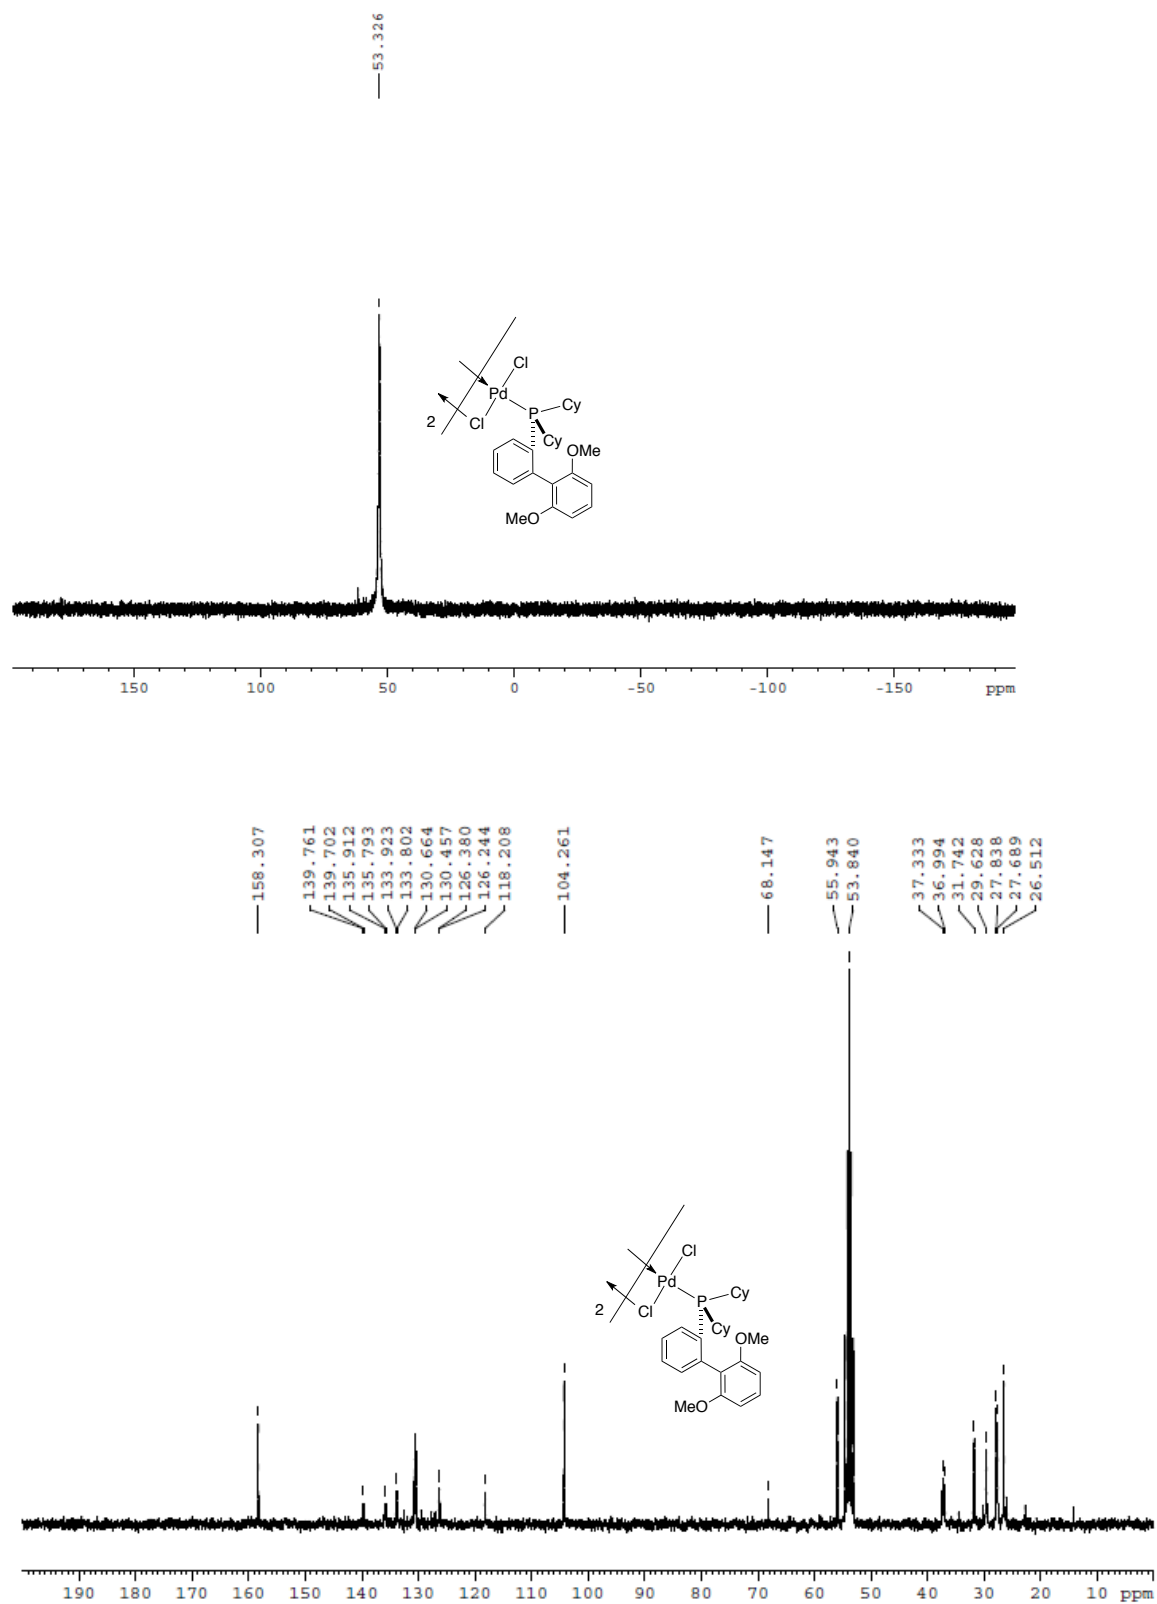

### $^1\text{H}$ , $^{31}\text{P}$ - $\{^1\text{H}\}$ and $^{13}\text{C}$ - $\{^1\text{H}\}$ NMR spectra of $[\text{Pd}(\text{IPr})(\text{SPhos})]$ (**6**)

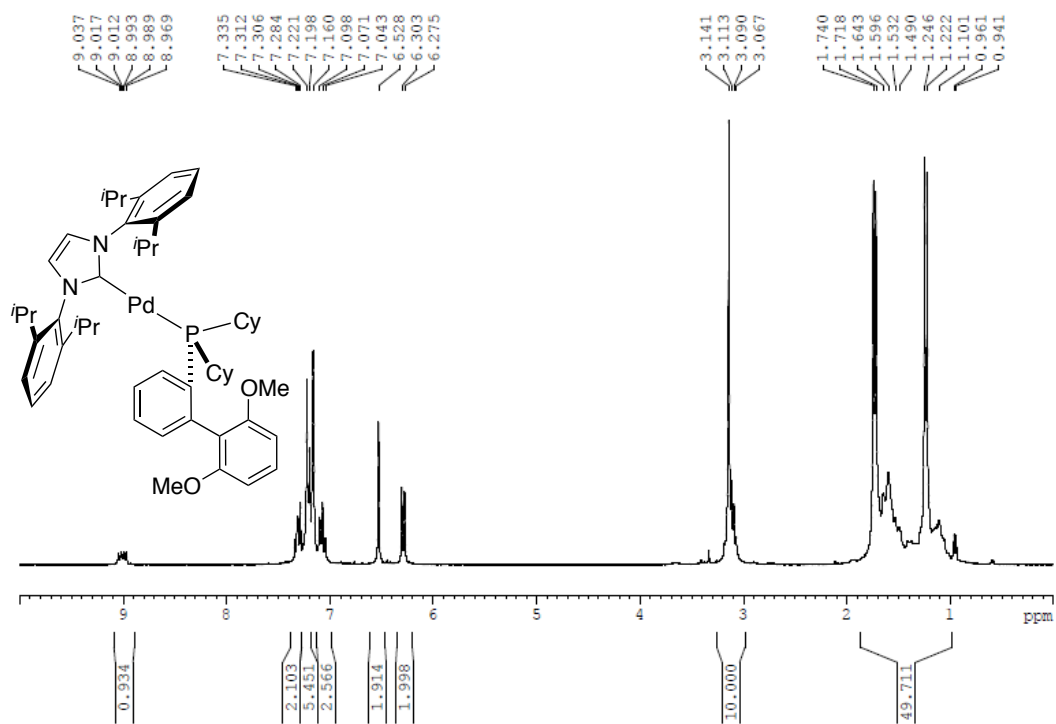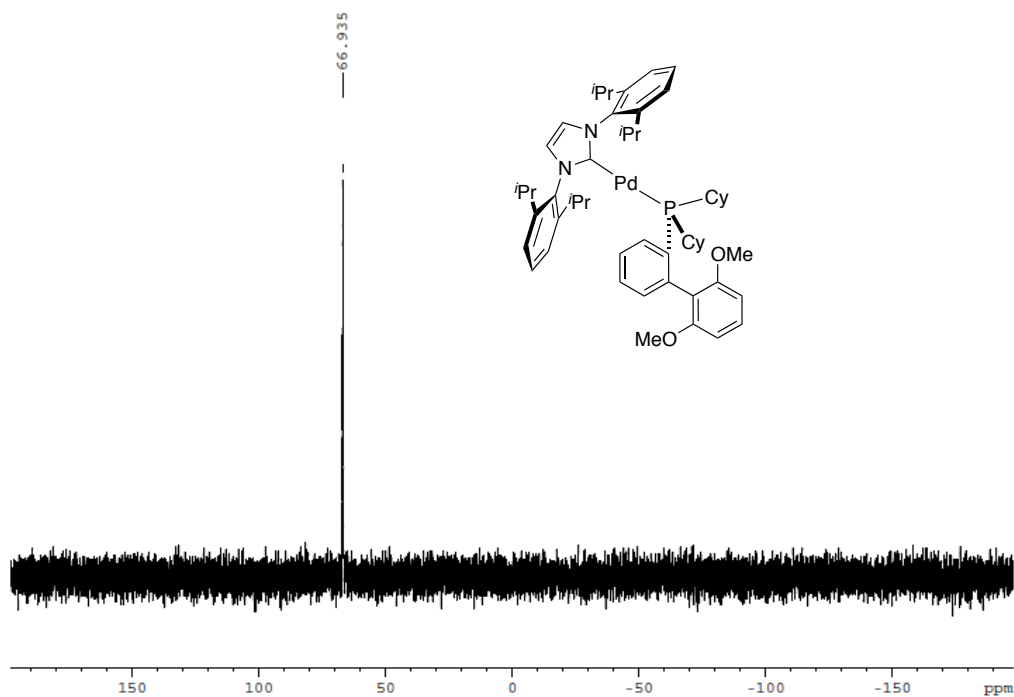

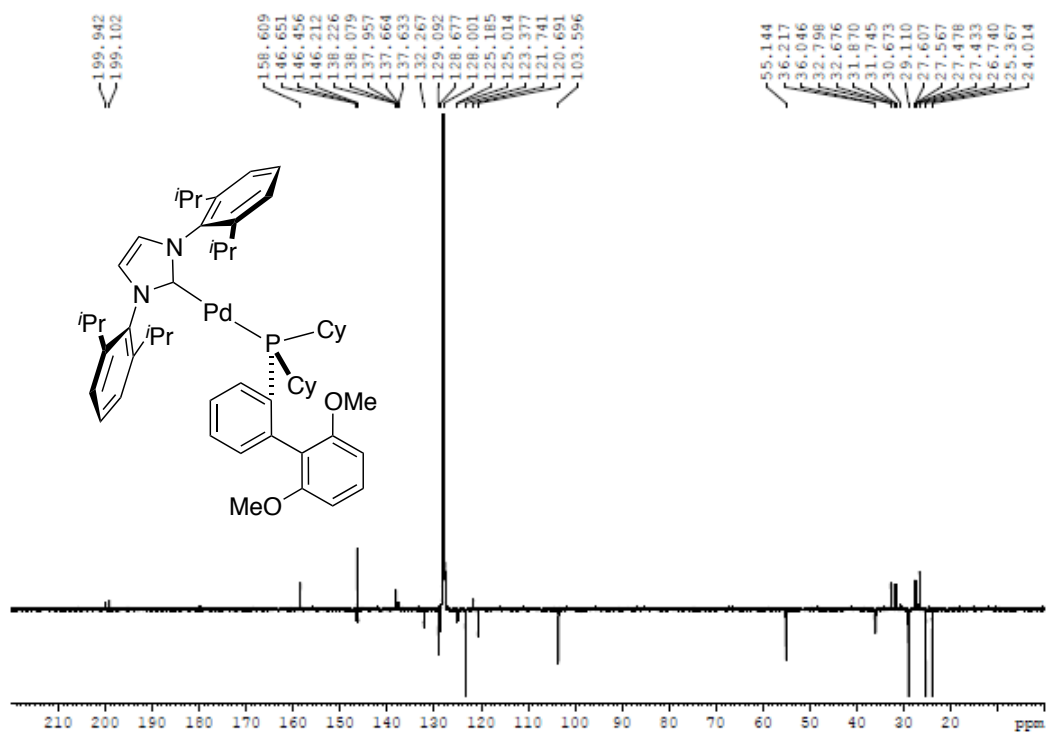

**$^1\text{H}$  NMR spectra of  $[\text{PdCl}_2(\text{IPr})\{\text{P}(o\text{-tolyl})_3\}]$  (2c) at various temperatures (in  $\text{C}_2\text{D}_2\text{Cl}_4$ )**

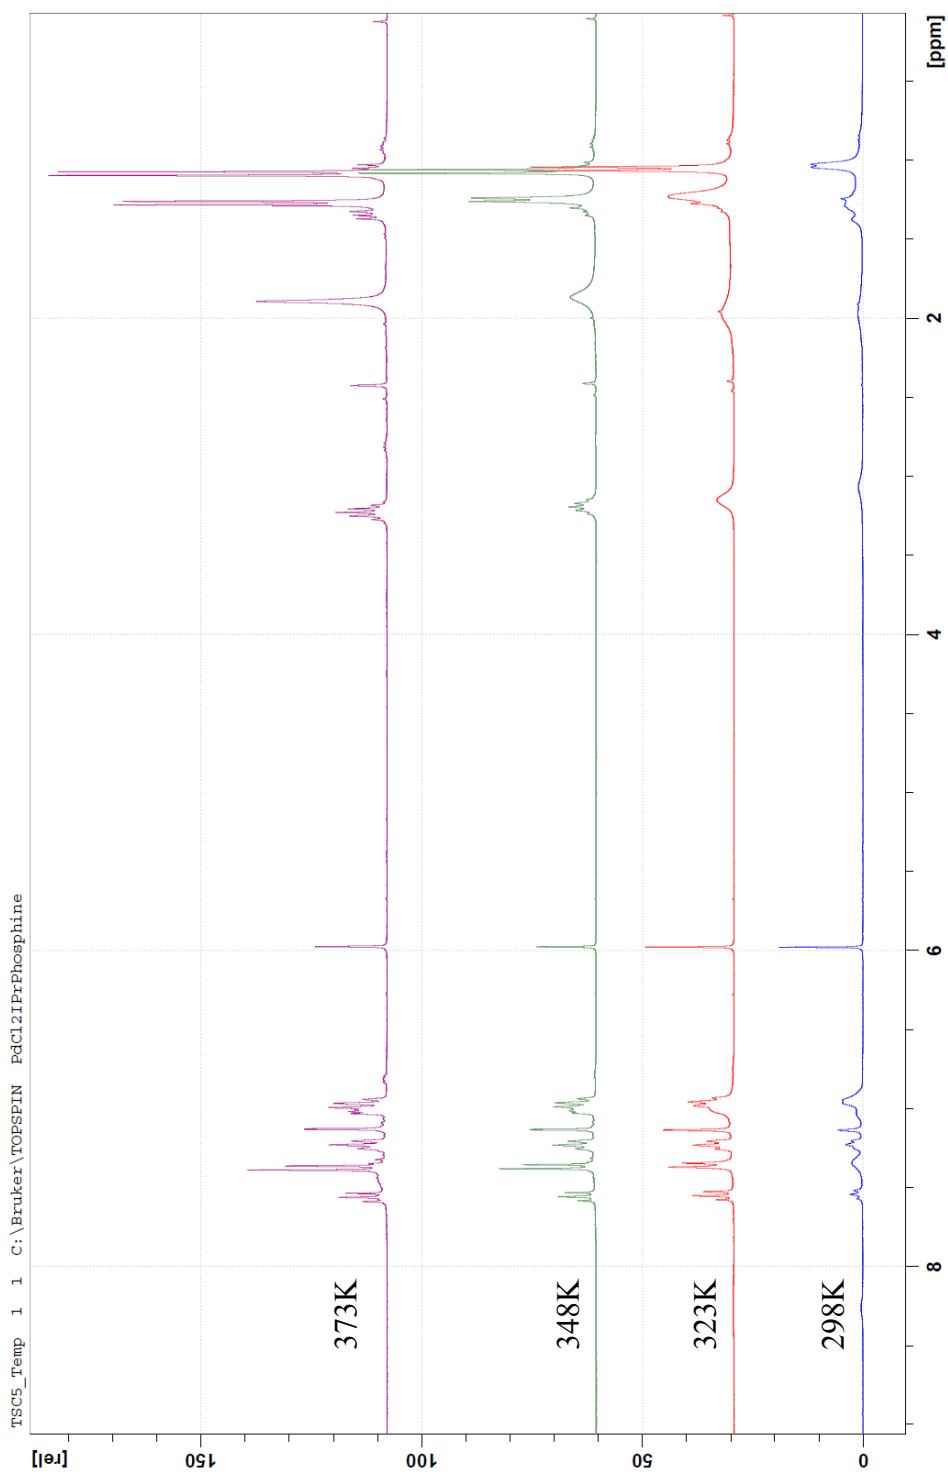

**$^1\text{H}$  NMR spectra of  $[\text{PdCl}_2(\text{IPr})\{\text{PCy}_2(o\text{-biphenyl})\}]$  (2e) at various temperatures  
(in  $\text{C}_2\text{D}_2\text{Cl}_4$ )**

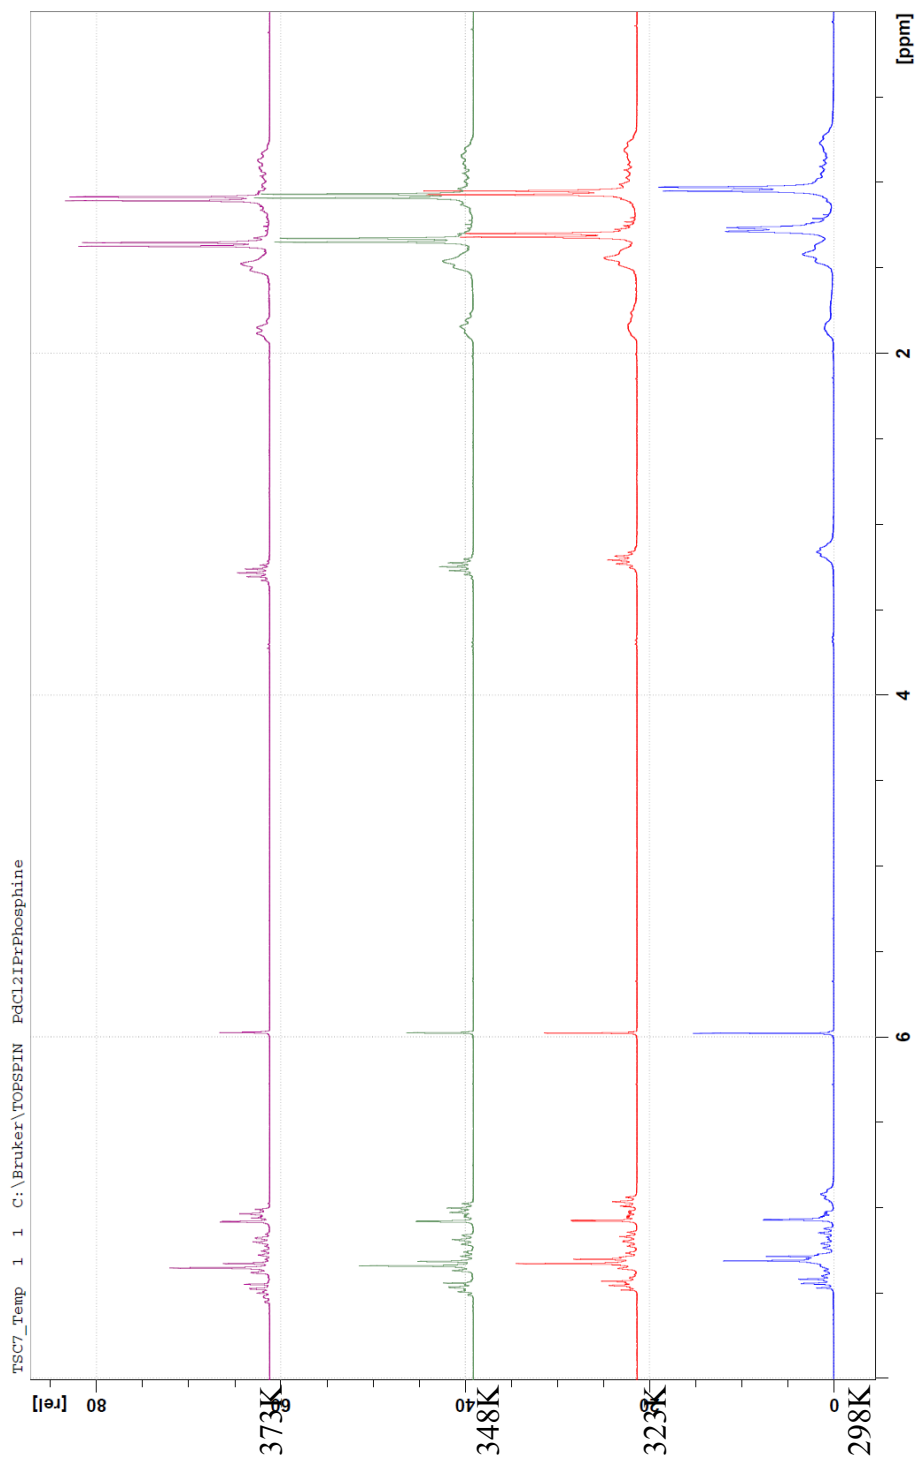

# $^1\text{H}$ NMR spectra stacking of $[\text{PdCl}_2(\text{IPr})(\text{XPhos})]$ (2f) at increasing temperatures ( $\text{C}_2\text{D}_2\text{Cl}_4$ )

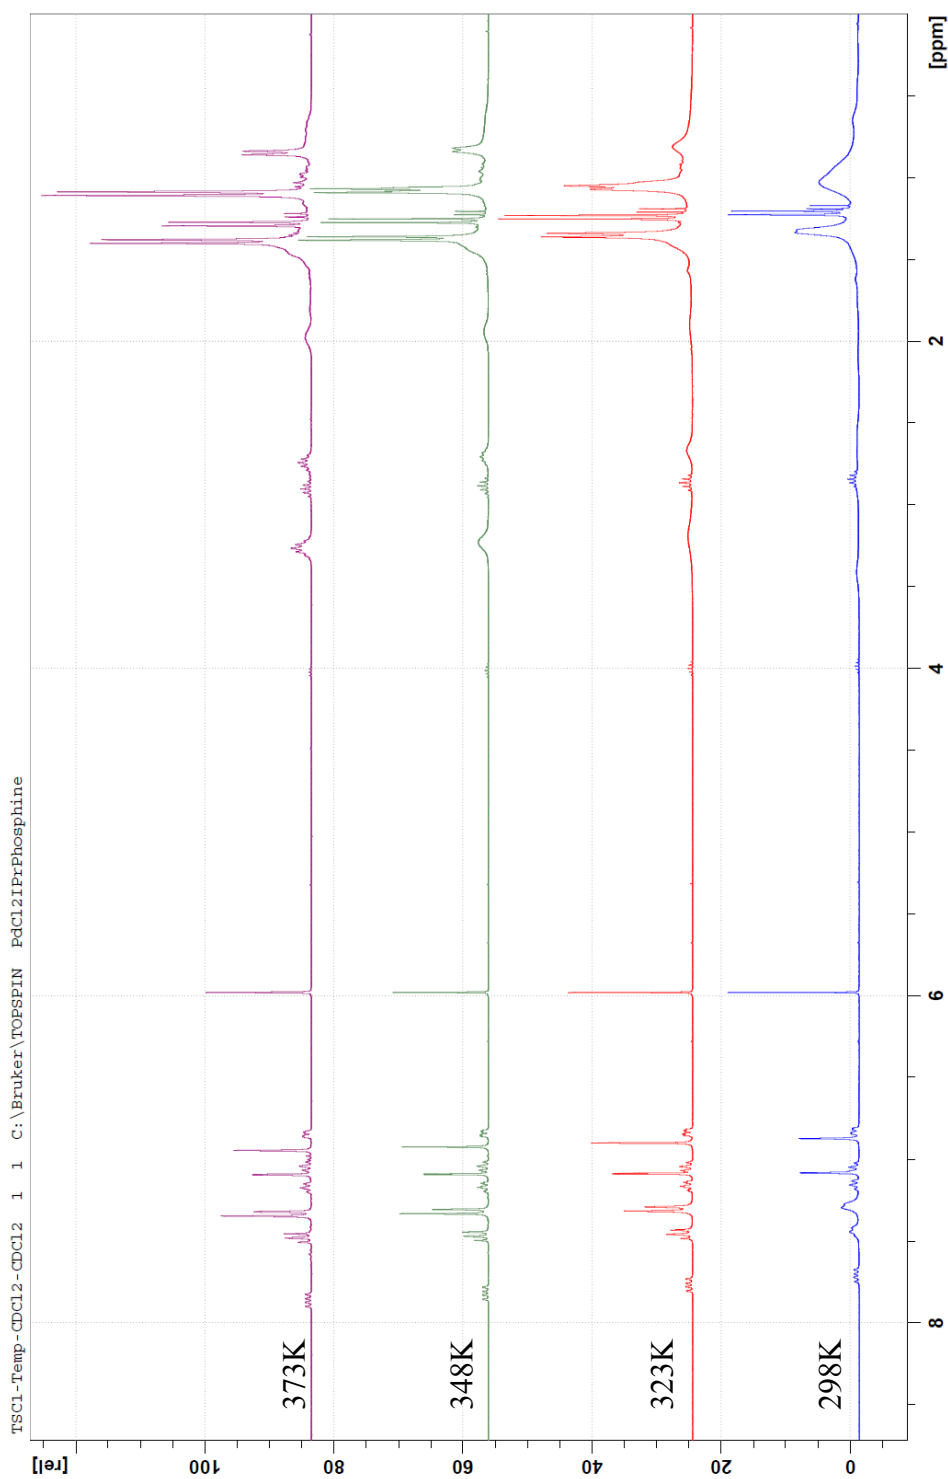

## Kinetic profiling for the Suzuki-Miyaura reaction mediated by **2g** and **6**

In a glovebox, a Radley tube was charged with phenylboronic acid (640 mg, 5.25 mmol), sodium hydroxide (300 mg, 7.25 mmol), Pd catalyst (Pd(II) complex: 4.9 mg,  $5 \cdot 10^{-3}$  mmol; Pd(0) complex: 4.5 mg,  $5 \cdot 10^{-3}$  mmol), and isopropanol (5 ml). Outside the glovebox, the tube was placed on a Radley carousel under argon atmosphere and 4-chlorotoluene (591.5  $\mu$ L, 5 mmol) was added. A sample was taken every 5 minutes during 1 hour, then every 10 minutes during 30 minutes, finally every 30 minutes during 2 hours and 30 minutes. Evolution of the reaction was followed by gas chromatography and conversion was determined ratio of integrals.

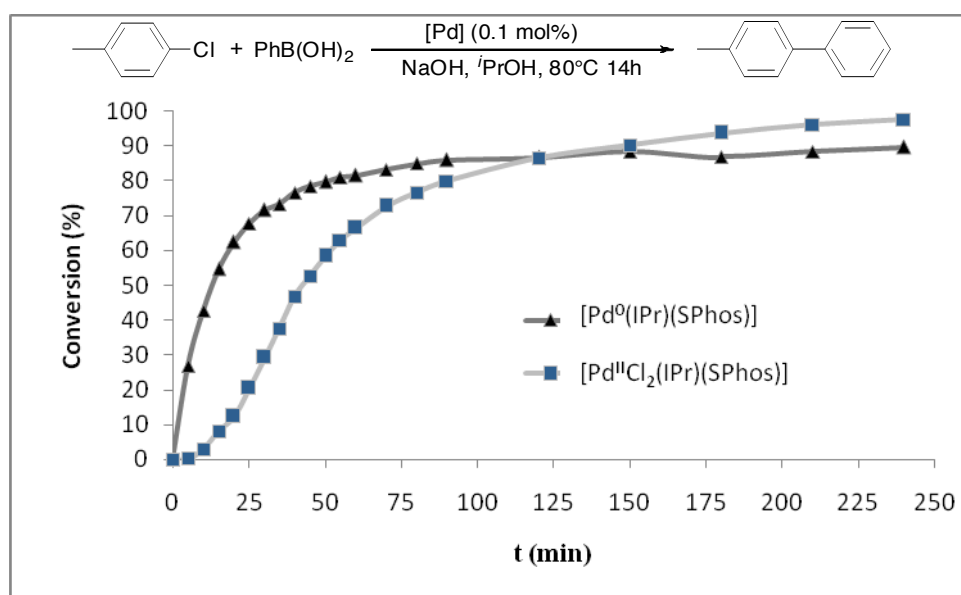

**Figure S1.** Comparison of [PdCl<sub>2</sub>(IPr)(SPhos)](**2g**) with [Pd(IPr)(SPhos)] (**6**). Reaction conditions: 4-Me-C<sub>6</sub>H<sub>4</sub> (5 mmol), PhB(OH)<sub>2</sub> (5.25 mmol), NaOH (7.5 mmol), **2g** or **6** 0.1 mol% Pd, iPrOH (5 mL), 80°C.

## General procedure for the Suzuki-Miyaura reaction

In a glovebox, a 5 mL screwcap-vial fitted with a septum equipped with a magnetic stirring bar was charged with the boronic acid (1.05 mmol), the aryl chloride (if solid, 1.0 mmol) and sodium hydroxide (1.5 mmol). A 0.01 M stock solution of the pre-catalyst was prepared (0.01 mmol in 1 mL THF) and the required volume was injected in the reaction vial. Unless

indicated otherwise, the volume injected was of 30  $\mu\text{L}$ , which corresponds to a catalyst loading of 0.03 mol%. Outside the glovebox, the aryl chloride (if liquid, 1 mmol) was introduced in the vial, followed by a degassed solution of  $\text{H}_2\text{O}:\text{PrOH}$  (9:1) (0.5 mL). The mixture was heated up to  $100^\circ\text{C}$  and stirred during 14 hours.  $\text{CH}_2\text{Cl}_2$  (10 mL) and water (10 mL) were then added to the reaction mixture, the phases were separated and the aqueous layer was extracted with  $\text{CH}_2\text{Cl}_2$  (2 x 10 mL). The organic phases were then combined, dried over  $\text{MgSO}_4$  and the crude product obtained after removing solvent under reduced pressure. The resulting product was purified by flash chromatography.

### Cross-coupling products (Scheme 3 entries)

#### 4-Methylbiphenyl<sup>1</sup>

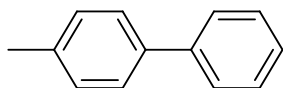

The procedure afforded, after flash chromatography on silica gel (pentane), 154 mg (91%) of the product as a colourless solid.

$^1\text{H}$  NMR ( $\text{CDCl}_3$ , 400 MHz):  $\delta$  2.41 (s, 3H,  $\text{CH}_3$ , 3H), 7.22-7.26 (m, 1H, Ph), 7.24-7.29 (m, 2H, Ph), 7.41-7.47 (t,  $^3J_{\text{H-H}} = 8.5$  Hz, 2H, Ph), 7.48-7.53 (d,  $^3J_{\text{H-H}} = 8.5$  Hz, 2H, Ph), 7.57-7.62 (m, 2H, Ph),  $^{13}\text{C}$ - $\{^1\text{H}\}$  NMR ( $\text{CDCl}_3$  100.6 MHz)  $\delta$  21.2 ( $\text{CH}_3$ ), 127.1 (Ar-CH), 127.1 (Ar-CH), 128.8 (Ar-CH), 129.6 (Ar-CH), 137.2 (Ar-C), 138.5 (Ar-C), 141.3 (Ar-C).

#### 3-Phenylanisole<sup>2</sup>

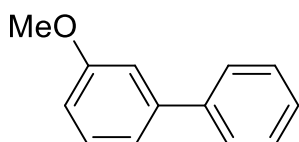

The procedure afforded, after flash chromatography on silica gel (pentane/EtOAc (95/5)), 181 mg (98%) of the product as a colourless solid.



$^1\text{H}$  NMR ( $\text{CDCl}_3$ , 400 MHz)  $\delta$  3.92 (s, 3H, O- $\text{CH}_3$ ), 6.96-7.02 (m, 1H, Ph), 7.22-7.30 (m, 2H, Ph), 7.40-7.47 (m, 2H, Ph), 7.49-7.55 (m, 2H, Ph), 7.66-7.71 (m, 2H, Ph),  $^{13}\text{C}$ - $\{^1\text{H}\}$  NMR ( $\text{CDCl}_3$  100.6 MHz)  $\delta$  55.3 (OCH<sub>3</sub>), 112.7 (Ar-CH), 113.0 (Ar-CH), 119.8 (Ar-CH), 127.3 (Ar-CH), 127.5 (Ar-CH), 128.8 (Ar-CH), 129.8 (Ar-CH), 141.2 (Ar-C), 142.8 (Ar-C), 160.0 (Ar-C).

### 2-Phenylanisole<sup>2</sup>

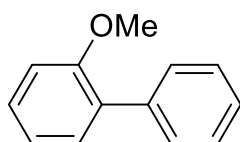

The procedure afforded, after flash chromatography on silica gel (pentane/EtOAc (95/5)), 175.8 mg (95%) of the product as a colourless oil.

$^1\text{H}$  NMR ( $\text{CDCl}_3$ , 400 MHz)  $\delta$  3.88 (s, 3H, O- $\text{CH}_3$ ), 7.04-7.08 (d,  $^3J_{\text{H-H}} = 7.9$  Hz, 1H, Ph), 7.09-7.15 (td,  $^3J_{\text{H-H}} = 7.9$  Hz,  $^4J_{\text{H-H}} = 1.3$  Hz, 1H, Ph), 7.38-7.44 (m, 3H, Ph), 7.47-7.53 (m, 2H, Ph), 7.61-7.65 (m, 2H, Ph),  $^{13}\text{C}$ - $\{^1\text{H}\}$  NMR ( $\text{CDCl}_3$  100.6 MHz)  $\delta$  55.6 (OCH<sub>3</sub>), 111.3 (Ar-CH), 120.9 (Ar-CH), 127.0 (Ar-CH), 128.1 (Ar-CH), 128.7 (Ar-CH), 129.6 (Ar-CH), 130.8 (Ar-C), 131.0 (Ar-CH), 138.6 (Ar-C), 156.5 (Ar-C).

### 4-Phenylanisole<sup>3</sup>

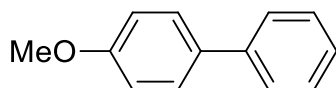

The procedure afforded, after a flash chromatography on silica gel (pentane/EtOAc: 95/5) 138 mg (76%) of the title compound as a white powder.

$^1\text{H}$  NMR ( $\text{CDCl}_3$ , 300 MHz)  $\delta$  3.89 (s, 3H, O- $\text{CH}_3$ ), 7.02-7.05 (m, 2H, Ph), 7.33-7.39 (m, 1H, Ph), 7.45-7.50 (m, 2H, Ph), 7.58-7.63 (m, 4H, Ph),  $^{13}\text{C}$ - $\{^1\text{H}\}$  NMR ( $\text{CDCl}_3$  75.5 MHz)  $\delta$  55.4 (OCH<sub>3</sub>), 114.3 (Ar-CH), 126.8 (Ar-CH), 126.8 (Ar-CH), 128.3 (Ar-CH), 128.8 (Ar-CH), 133.9 (Ar-C), 140.9 (Ar-C), 159.3 (Ar-C).

## 2-Methylbiphenyl<sup>2</sup>

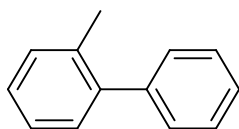

The procedure afforded, after flash chromatography on silica gel (pentane), 155.5mg (92%) of the product as a colourless oil.

<sup>1</sup>H NMR (CDCl<sub>3</sub>, 400 MHz) δ 2.36 (s, 3H, CH<sub>3</sub>), 7.30-7.37 (m, 4H, Ph), 7.38-7.44 (m, 3H, Ph), 7.45-7.52 (m, 2H, Ph), <sup>13</sup>C-<sup>1</sup>H} NMR (CDCl<sub>3</sub> 100.6 MHz) δ 20.6 (CH<sub>3</sub>), 125.9 (Ar-CH), 126.9 (Ar-CH), 127.4 (Ar-CH), 128.2 (Ar-CH), 129.3 (Ar-CH), 129.9 (Ar-CH), 130.4 (Ar-CH), 135.4 (Ar-C), 142.1 (Ar-C), 142.2 (Ar-C).

## 2,6-Dimethylbiphenyl<sup>4</sup>

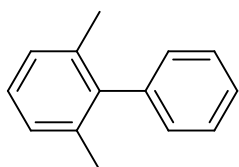

The procedure afforded, after flash chromatography on silica gel (pentane), 159 mg (87%) of the product as a colourless oil.

<sup>1</sup>H NMR (CDCl<sub>3</sub>, 300 MHz) δ 2.11 (s, 6H, CH<sub>3</sub>), 7.13-7.28 (m, 5H Ph), 7.36-7.43 (m, 1H, Ph), 7.45-7.52 (m, 2H, Ph), <sup>13</sup>C-<sup>1</sup>H} NMR (CDCl<sub>3</sub> 75.5 MHz) δ 21.0 (CH<sub>3</sub>), 126.7 (Ar-CH), 127.2 (Ar-CH), 127.4 (Ar-CH), 128.5 (Ar-CH), 129.1 (Ar-CH), 136.2 (Ar-C), 141.2 (Ar-C), 142.0 (Ar-C).

## 9-Phenylanthracene<sup>5</sup>

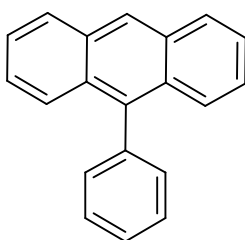

The procedure afforded, after a flash chromatography on silicagel (pentane/EtOAc : 95/5) 238 mg (94%) of the title compound as a yellow solid.

$^1\text{H}$  NMR ( $\text{CDCl}_3$ , 400 MHz):  $\delta$  7.36-7.38 (m, 2H, Ar-H), 7.44-7.49 (m, 4H, Ar-H), 7.54-7.62 (m, 3H, Ar-H), 7.69 (d,  $^3J_{\text{H-H}} = 8.7$  Hz, 2H, Ar-H), 8.06 (d,  $^3J_{\text{H-H}} = 8.7$  Hz, 2H, Ar-H), 8.51 (s, 1H,  $\text{C}^{10}\text{-H}$ ),  $^{13}\text{C}\text{-}\{^1\text{H}\}$  NMR ( $\text{CDCl}_3$ , 100.6 MHz):  $\delta$  = 125.4 (Ar-CH), 125.6 (Ar-CH), 126.8 (Ar-CH), 127.1 (Ar-CH), 127.8 (Ar-CH), 128.6 (Ar-CH), 130.5 (Ar-C), 131.5 (Ar-CH), 131.7 (Ar-C), 137.3 (Ar-C), 139.1 (Ar-C).

### 2,2'-Dimethylbiphenyl<sup>6</sup>

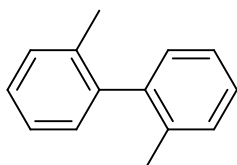

The procedure afforded, after flash chromatography on silica gel (pentane), 160.4 mg (88%) of the product as a colourless oil.

$^1\text{H}$  NMR ( $\text{CDCl}_3$ , 400 MHz)  $\delta$  2.11 (s, 6H,  $\text{CH}_3$ ), 7.14-7.18 (m, 2H, Ph), 7.24-7.33 (m, 6H, Ph),  $^{13}\text{C}\text{-}\{^1\text{H}\}$  NMR ( $\text{CDCl}_3$  100.6 MHz)  $\delta$  20.0 ( $\text{CH}_3$ ), 125.7 (Ar-CH), 127.3 (Ar-CH), 129.4 (Ar-CH), 129.9 (Ar-CH), 135.9 (Ar-C), 141.7 (Ar-C).

### 2,2',6-Trimethylbiphenyl<sup>2</sup>

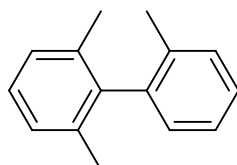

The procedure afforded, after flash chromatography on silica gel (pentane), 152 mg (76%) of the product as a colourless oil.

$^1\text{H}$  NMR ( $\text{CDCl}_3$ , 400 MHz)  $\delta$  2.07 (s, 6H,  $\text{CH}_3$ ), 2.09 (s, 3H,  $\text{CH}_3$ ), 7.00-7.15 (m, 1H, Ph), 7.20-7.24 (d,  $^3J_{\text{H-H}} = 8$  Hz, 2H, Ph), 7.25-7.30 (m, 1H, Ph), 7.31-7.41 (m, 3H, Ph),  $^{13}\text{C}\text{-}\{^1\text{H}\}$  NMR ( $\text{CDCl}_3$  100.6 MHz)  $\delta$  19.5 ( $\text{CH}_3$ ), 20.5 ( $\text{CH}_3$ ), 126.2 (Ar-CH), 127.1 (Ar-CH), 127.1 (Ar-CH), 127.4 (Ar-CH), 128.9 (Ar-CH), 130.1 (Ar-CH), 135.7 (Ar-C), 135.9 (Ar-C), 140.7 (Ar-C), 141.2. (Ar-C)

### 2,2',4,6-Tetramethylbiphenyl<sup>7</sup>

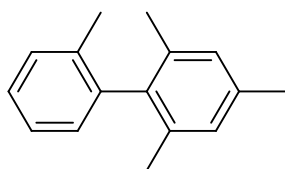

The procedure afforded, after flash chromatography on silica gel (pentane), 157 mg (74%) of the product as a colourless oil.

<sup>1</sup>H NMR (CDCl<sub>3</sub>, 400 MHz) δ 1.98 (s, 6H, CH<sub>3</sub>), 2.04 (s, 3H, CH<sub>3</sub>), 2.39 (s, 3H, CH<sub>3</sub>), 7.00 (s, 2H, Ph), 7.04-7.13 (d, <sup>3</sup>J<sub>H-H</sub> = 0.8 Hz, 1H, Ph), 7.24-7.38 (m, 3H, Ph), <sup>13</sup>C-<sup>1</sup>H NMR (CDCl<sub>3</sub> 100.6 MHz) δ 19.6 (CH<sub>3</sub>), 20.3 (CH<sub>3</sub>), 21.2 (CH<sub>3</sub>), 126.1 (Ar-CH), 127.0 (Ar-CH), 128.1 (Ar-CH), 129.3 (Ar-CH), 130.0 (Ar-CH), 135.8 (Ar-C), 135.9 (Ar-C), 136.4 (Ar-C), 138.3 (Ar-C), 140.7 (Ar-C).

### 2,4,6-Trimethyl-2'-methoxybiphenyl<sup>8</sup>

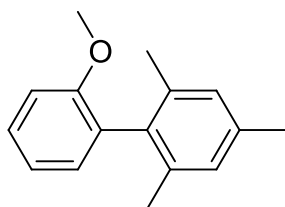

The procedure afforded, after flash chromatography on silica gel (pentane/EtOAc (95/5)), 202 mg (89%) of the product as a colourless oil.

<sup>1</sup>H NMR (CDCl<sub>3</sub>, 400 MHz) δ 2.13 (s, 6H, CH<sub>3</sub>), 2.46 (s, 3H, CH<sub>3</sub>), 3.85 (s, 3H, O-CH<sub>3</sub>), 7.05-7.18 (m, 5H, Ph), 7.41-7.49 (m, 1H, Ph), <sup>13</sup>C-<sup>1</sup>H NMR (CDCl<sub>3</sub> 100.6 MHz) δ 20.5 (CH<sub>3</sub>), 21.3 (CH<sub>3</sub>), 55.4 (OCH<sub>3</sub>), 110.9 (Ar-CH), 120.7 (Ar-CH), 128.1 (Ar-CH), 128.4 (Ar-CH), 129.6 (Ar-CH), 131.1 (Ar-C), 135.4 (Ar-CH), 136.6 (Ar-C), 136.6 (Ar-C), 156.8 (Ar-C).

### 2-*o*-Tolylbiphenyl<sup>9</sup>

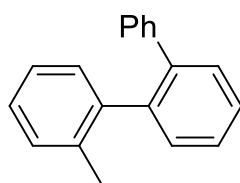

The procedure afforded, after flash chromatography on silica gel (pentane), 230 mg (94%) of the product as a colourless solid.

$^1\text{H}$  NMR ( $\text{CDCl}_3$ , 400 MHz)  $\delta$  2.01 (s, 3H,  $\text{CH}_3$ ), 7.12-7.28 (m, 9H, Ph), 7.37-7.41 (d,  $^3J_{\text{H-H}} = 7.1$  Hz, 1H, Ph), 7.44-7.58 (m, 3H, Ph),  $^{13}\text{C}$ - $\{^1\text{H}\}$  NMR ( $\text{CDCl}_3$  100.6 MHz)  $\delta$  20.2 ( $\text{CH}_3$ ), 125.4 (Ar-CH), 126.5 (Ar-CH), 127.1 (Ar-CH), 127.2 (Ar-CH), 127.6 (Ar-CH), 127.8 (Ar-CH), 129.5 (Ar-CH), 129.8 (Ar-CH), 130.1 (Ar-CH), 130.7 (Ar-CH), 130.8 (Ar-CH), 135.9 (Ar-CH), 140.4 (Ar-C), 141.1 (Ar-C), 141.4 (Ar-C), 141.5 (Ar-C).

### 2-Phenyl, 2'-methoxybiphenyl<sup>10</sup>

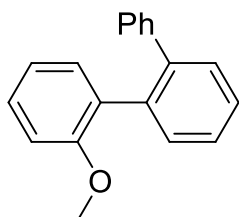

The procedure afforded, after flash chromatography on silica gel (pentane/EtOAc (95/5)), 247 mg (95%) of the product as a colourless solid.

$^1\text{H}$  NMR ( $\text{CDCl}_3$ , 400 MHz)  $\delta$  3.39 (s, 3H, O- $\text{CH}_3$ ), 6.71-6.77 (d,  $^3J_{\text{H-H}} = 8.5$  Hz, 1H, Ph), 6.93-6.99 (t,  $^3J_{\text{H-H}} = 7.5$  Hz, 1H, Ph), 7.15-7.30 (m, 7H, Ph), 7.41-7.52 (m, 4H, Ph),  $^{13}\text{C}$ - $\{^1\text{H}\}$  NMR ( $\text{CDCl}_3$  100.6 MHz)  $\delta$  55.0 ( $\text{OCH}_3$ ), 110.8 (Ar-CH), 120.5 (Ar-CH), 126.3 (Ar-CH), 127.3 (Ar-CH), 127.5 (Ar-CH), 127.7 (Ar-CH), 128.6 (Ar-CH), 129.1 (Ar-CH), 129.8 (Ar-CH), 130.8 (Ar-C), 131.0 (Ar-CH), 131.7 (Ar-CH), 137.4 (Ar-C), 141.8 (Ar-C), 142.3 (Ar-C), 156.4 (Ar-C).

### 2-Phenyl, 4'-methylbiphenyl<sup>11</sup>

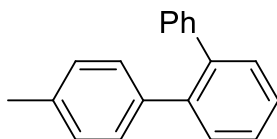

The procedure afforded, after flash chromatography on silica gel (pentane), 218 mg (89%) of the product as a colourless solid.

$^1\text{H}$  NMR ( $\text{CDCl}_3$ , 400 MHz)  $\delta$  2.35 (s, 3H,  $\text{CH}_3$ ), 7.04-7.11 (m, 4H, Ph), 7.18-7.29 (m, 5H, Ph), 7.41-7.50 (m, 4H, Ph),  $^{13}\text{C}$ - $\{^1\text{H}\}$  NMR ( $\text{CDCl}_3$  100.6 MHz)  $\delta$  21.2 ( $\text{CH}_3$ ), 126.3 (Ar-CH), 127.4 (Ar-CH), 127.6 (Ar-CH), 128.0 (Ar-CH), 128.7 (Ar-CH), 129.9 (Ar-CH), 130.0 (Ar-CH), 130.7 (Ar-CH), 136.2 (Ar-C), 138.7 (Ar-C), 140.6 (Ar-C), 141.8 (Ar-C).

### 9-(2-Methoxyphenyl)-anthracene<sup>8</sup>

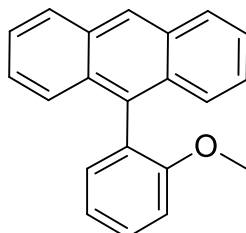

The procedure afforded, after flash chromatography on silica gel (pentane/EtOAc (95/5)), 196 mg (69%) of the product as a yellow solid.

$^1\text{H}$  NMR ( $\text{CDCl}_3$ , 400 MHz)  $\delta$  3.62 (s, 3H, O- $\text{CH}_3$ ), 7.14-7.21 (m, 2H, Ar), 7.24-7.30 (m, 1H, Ar), 7.30-7.38 (m, 2H, Ar), 7.41-7.49 (t,  $^3J_{\text{H-H}} = 8$  Hz, 2H, Ar), 7.55 (t,  $^3J_{\text{H-H}} = 8$  Hz, 1H, Ar), 7.64 (d,  $^3J_{\text{H-H}} = 8$  Hz, 2H, Ar), 8.05 (d,  $^3J_{\text{H-H}} = 8$  Hz, 2H, Ar), 8.50 (s, 1H, Ar),  $^{13}\text{C}$ - $\{^1\text{H}\}$  NMR ( $\text{CDCl}_3$  100.6 MHz)  $\delta$  55.7 ( $\text{OCH}_3$ ), 111.4 (Ar-CH), 120.8 (Ar-CH), 125.1 (Ar-CH), 125.3 (Ar-CH), 126.7 (Ar-CH), 126.9 (Ar-CH), 127.4 (Ar-C), 128.5 (Ar-CH), 129.4 (Ar-CH), 130.5 (Ar-C), 131.6 (Ar-C), 133.0 (Ar-CH), 133.9 (Ar-C), 158.1 (Ar-C).

### 9-(*o*-Biphenyl)anthracene<sup>12</sup>

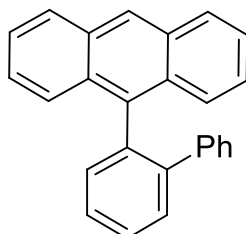

The procedure, using 0.06 mol% of catalyst, after flash chromatography on silica gel (pentane/EtOAc (95/5)), afforded 193 mg (58%) of the product as a yellow solid.

$^1\text{H}$  NMR ( $\text{CDCl}_3$ , 400 MHz)  $\delta$  6.80-6.88 (m, 3H, Ar), 6.95-7.00 (m, 2H, Ar), 7.29-7.35 (m, 2H, Ar), 7.36-7.44 (m, 3H, Ar), 7.51-7.58 (m, 1H, Ar), 7.60-7.69 (m, 4H, Ar), 7.95 (d,  $^3J_{\text{H-H}} =$

8.8 Hz, 2H, Ar), 8.38 (s, 1H, Ar),  $^{13}\text{C}$ - $\{^1\text{H}\}$  NMR ( $\text{CDCl}_3$  100.6 MHz)  $\delta$  125.0 (Ar-CH), 125.4 (Ar-CH), 126.5 (Ar-CH), 126.6 (Ar-CH), 127.0 (Ar-CH), 127.3 (Ar-CH), 127.5 (Ar-CH), 128.3 (Ar-CH), 128.5 (Ar-CH), 128.5 (Ar-CH), 130.4 (Ar-CH), 130.5 (Ar-C), 131.2 (Ar-C), 132.5 (Ar-CH), 136.3 (Ar-C), 137.1 (Ar-C), 141.3 (Ar-C), 143.3 (Ar-C).

### 2-Phenylpyridine<sup>13</sup>

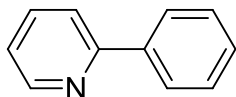

The procedure afforded, after flash chromatography on silica gel ( $\text{CH}_2\text{Cl}_2$ ), 75 mg (48%) of the product as colourless oil.

$^1\text{H}$  NMR ( $\text{CDCl}_3$ , 400 MHz)  $\delta$  7.20-7.27 (m, 1H, Ar), 7.40-7.54 (m, 3H, Ar), 7.72-7.79 (m, 2H, Ar), 7.98-8.06 (m, 2H, Ar), 8.69-8.76 (dt,  $^3J_{\text{H-H}} = 6$  Hz,  $^4J_{\text{H-H}} = 2.0$  Hz, 1H, Ar),  $^{13}\text{C}$ - $\{^1\text{H}\}$  NMR ( $\text{CDCl}_3$  100.6 MHz)  $\delta$  120.7 (Ar-CH), 122.2 (Ar-CH), 127.0 (Ar-CH), 128.9 (Ar-CH), 129.0 (Ar-CH), 136.9 (Ar-CH), 139.5 (Ar-C), 149.8 (Ar-CH), 157.6 (Ar-C).

### 3-Phenylpyridine<sup>14</sup>

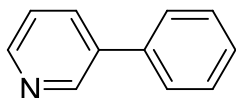

The procedure afforded, after flash chromatography on silica gel (pentane/EtOAc (85/15)), 152mg (98%) of the product as colourless oil.

$^1\text{H}$  NMR ( $\text{CDCl}_3$ , 400 MHz)  $\delta$  7.36-7.43 (m, 2H, Ar), 7.47-7.51 (m, 2H, Ar), 7.58-7.60 (m, 2H, Ar), 7.87-7.90 (m, 1H, Ar), 8.61 (d,  $J_{\text{H-H}} = 3.7$  Hz, 1H, Ar), 8.87 (d,  $J_{\text{H-H}} = 1.5$  Hz, 1H, Ar),  $^{13}\text{C}$ - $\{^1\text{H}\}$  NMR ( $\text{CDCl}_3$  100.6 MHz)  $\delta$  123.7 (Ar-CH), 127.3 (Ar-CH), 128.3 (Ar-CH), 129.2 (Ar-CH), 134.6 (Ar-CH), 136.9 (Ar-CH), 137.9 (Ar-C), 148.3 (Ar-C), 148.4 (Ar-CH).

### Diphenylmethane<sup>15</sup>

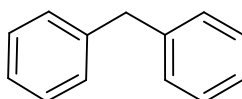

The procedure afforded, after flash chromatography on silica gel (pentane), 90 mg (53%) of the product as colourless oil.

$^1\text{H}$  NMR ( $\text{CDCl}_3$ , 400 MHz)  $\delta$  3.94 (s, Ph- $\text{CH}_2$ -Ph, 2H), 7.12-7.18 (m, 6H, Ph), 7.21-7.27 (m, 4H, Ph),  $^{13}\text{C}$ - $\{^1\text{H}\}$  NMR ( $\text{CDCl}_3$ , 100.6 MHz)  $\delta$  42.0 ( $\text{CH}_2$ ), 126.2 (Ar-CH), 128.6 (Ar-CH), 129.0 (Ar-CH), 141.2 (Ar-C).

#### 4-Formyl-1,1'-biphenyl<sup>16</sup>

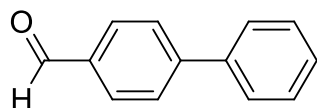

The procedure, using 0.06 mol% of catalyst, after flash chromatography on silica gel (pentane/EtOAc (95/5)), afforded 153 mg (84%) of the product as a crystalline solid.

$^1\text{H}$  NMR ( $\text{CDCl}_3$ , 400 MHz)  $\delta$  7.39-7.51 (m, 3H, Ph), 7.61-7.66 (m, 2H, Ph), 7.72-7.76 (dt,  $^3J_{\text{H-H}} = 8.3$  Hz,  $J_{\text{H-H}} = 1.3$  Hz, 2H, Ph), 7.92-7.97 (dt,  $^3J_{\text{H-H}} = 8.3$  Hz,  $^4J_{\text{H-H}} = 1.8$  Hz, 2H, Ph), 10.05 (s, 1H, H-C=O),  $^{13}\text{C}$ - $\{^1\text{H}\}$  NMR ( $\text{CDCl}_3$  100.6 MHz)  $\delta$  127.4 (Ar-CH), 127.7 (Ar-CH), 128.5 (Ar-CH), 129.1 (Ar-CH), 130.3 (Ar-CH), 135.2 (Ar-C), 139.7 (Ar-C), 147.2 (Ar-C), 191.9 (C=O).

#### 4-Phenyl-7-(trifluoromethyl)quinoline

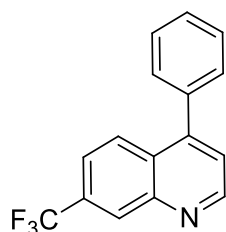

The procedure, using 0.06 mol% of catalyst, after a flash chromatography on silica gel (pentane/EtOAc: 1/0 to 95/5) afforded 200 mg (73%) of the title compound as a white solid.

$^1\text{H}$  NMR ( $\text{CDCl}_3$ , 300 MHz):  $\delta$  7.42-7.58 (m, 6H, Ar), 7.64-7.67 (m, 1H, Ar), 8.05 (d,  $^3J_{\text{H-H}} = 8.8$  Hz, 1H, Ar), 8.49 (s, 1H, Ar), 9.02 (d,  $^3J_{\text{H-H}} = 4.3$  Hz, 1H, Ar),  $^{13}\text{C}$  NMR ( $\text{CDCl}_3$ , 75.5 MHz):  $\delta$  122.2 (q,  $^4J_{\text{C-F}} = 3.1$  Hz, Ar-CH), 123.0 (s, Ar-CH), 125.8 (s, Ar-C), 127.4 (s, Ar-



CH), 127.8 (q,  $^3J_{C-F} = 4.1$  Hz, Ar-CH), 128.4 (s, Ar-C), 128.9 (s, Ar-CH), 128.9 (s, Ar-CH), 129.5 (s, Ar-CH), 131.2 (q,  $^1J_{C-F} = 32.8$  Hz, Ar-C-CF<sub>3</sub>), 137.2 (s, Ar-C), 147.8 (s, Ar-C), 148.6 (s, Ar-C), 151.4 (s, Ar-CH). HRMS (CI) calcd. C<sub>16</sub>H<sub>10</sub>F<sub>3</sub>N: (M + H)<sup>+</sup>, 274.0844; found: (M + H)<sup>+</sup>, 274.0835.

## NMR spectra of products

### $^1\text{H}$ and $^{13}\text{C}\{-^1\text{H}\}$ NMR spectra of 4-methylbiphenyl

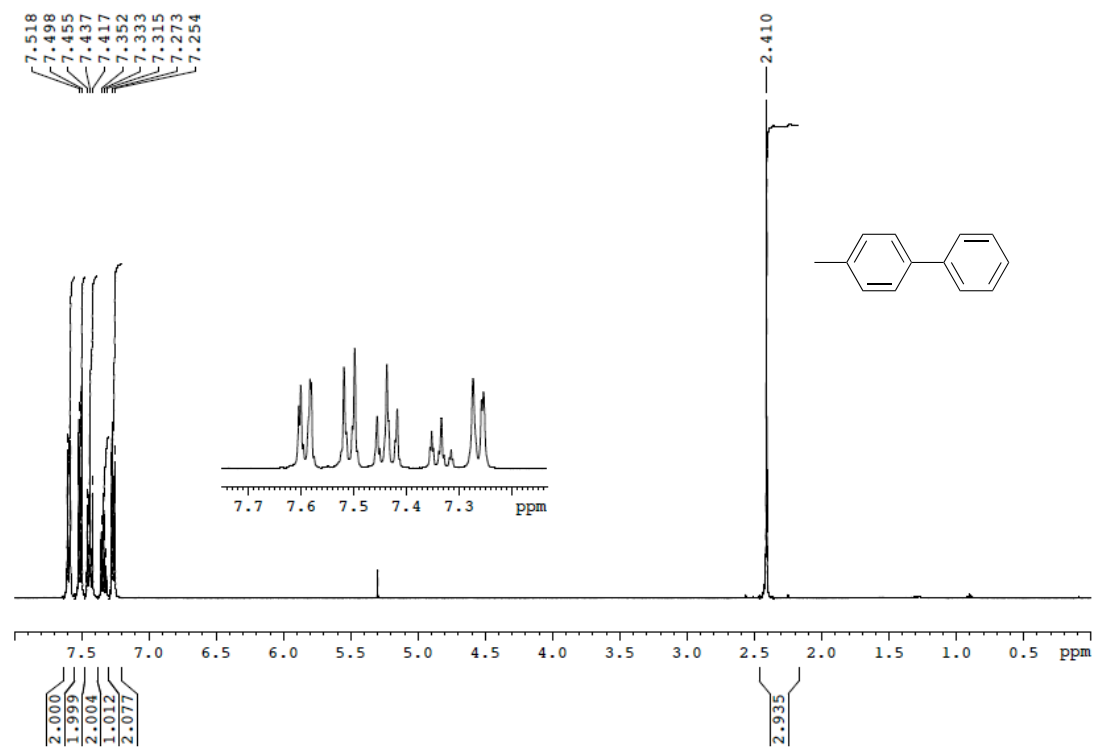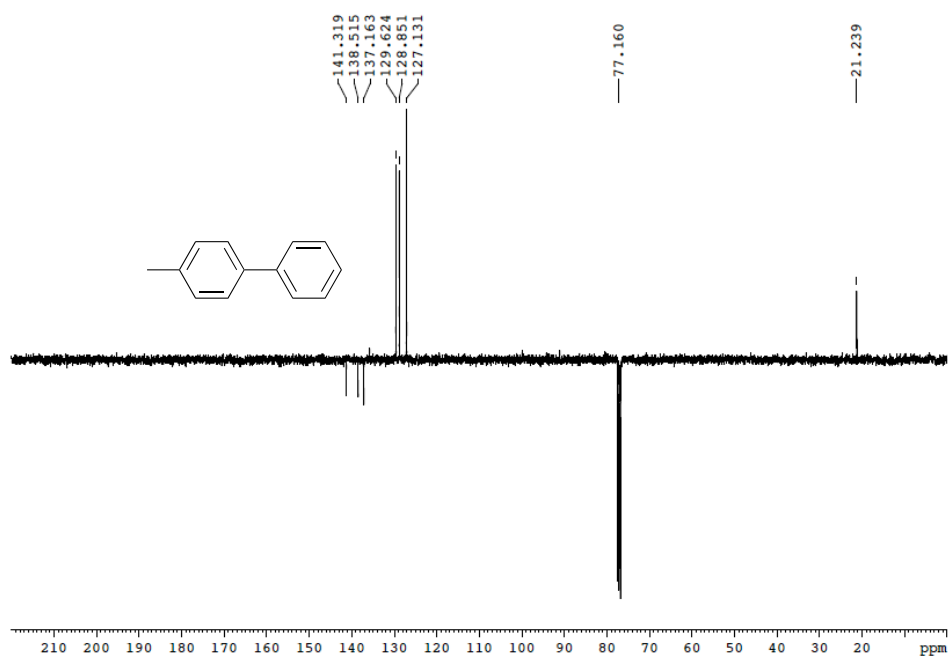

### $^1\text{H}$ and $^{13}\text{C}\{-^1\text{H}\}$ NMR spectra of 3-phenylanisole

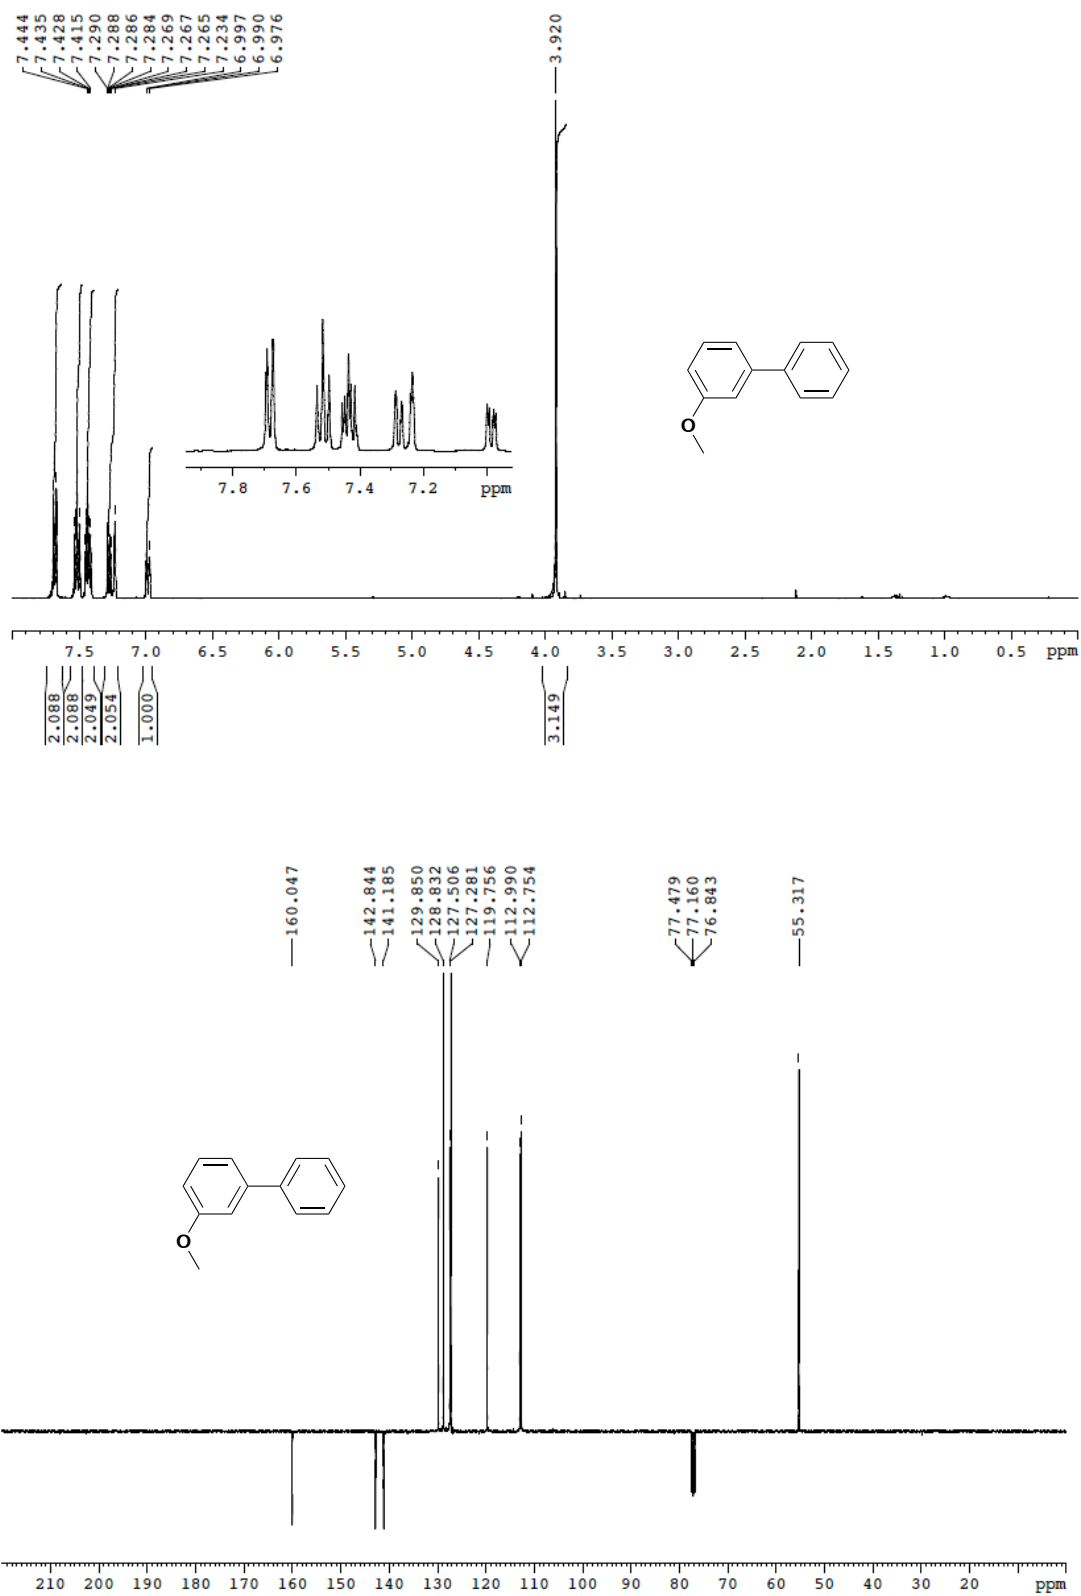

### $^1\text{H}$ and $^{13}\text{C}\{-^1\text{H}\}$ NMR spectra of 2-phenylanisole:

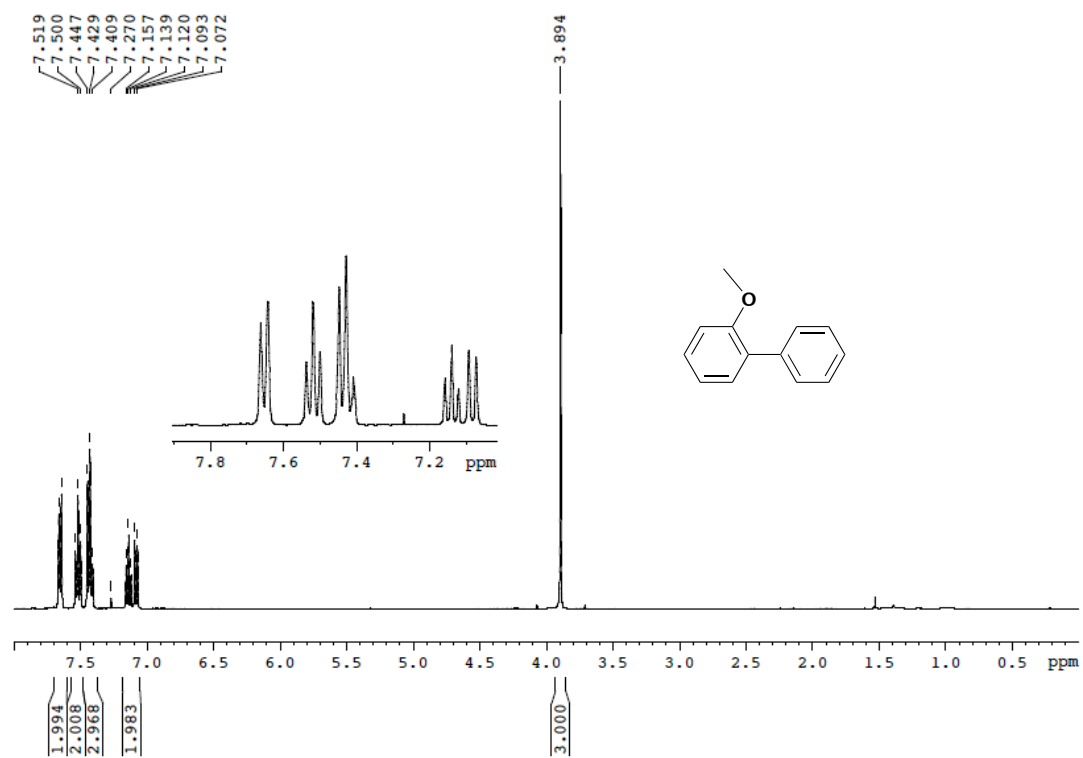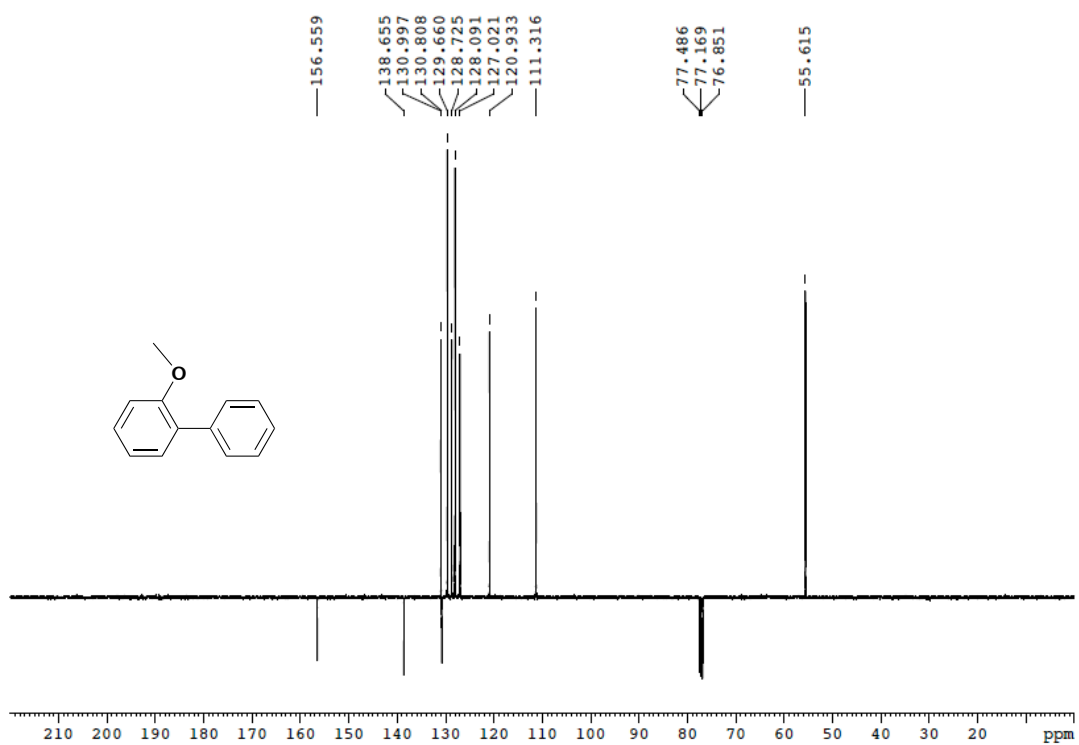

# $^1\text{H}$ and $^{13}\text{C}\{-^1\text{H}\}$ NMR spectra of 4-phenylanisole

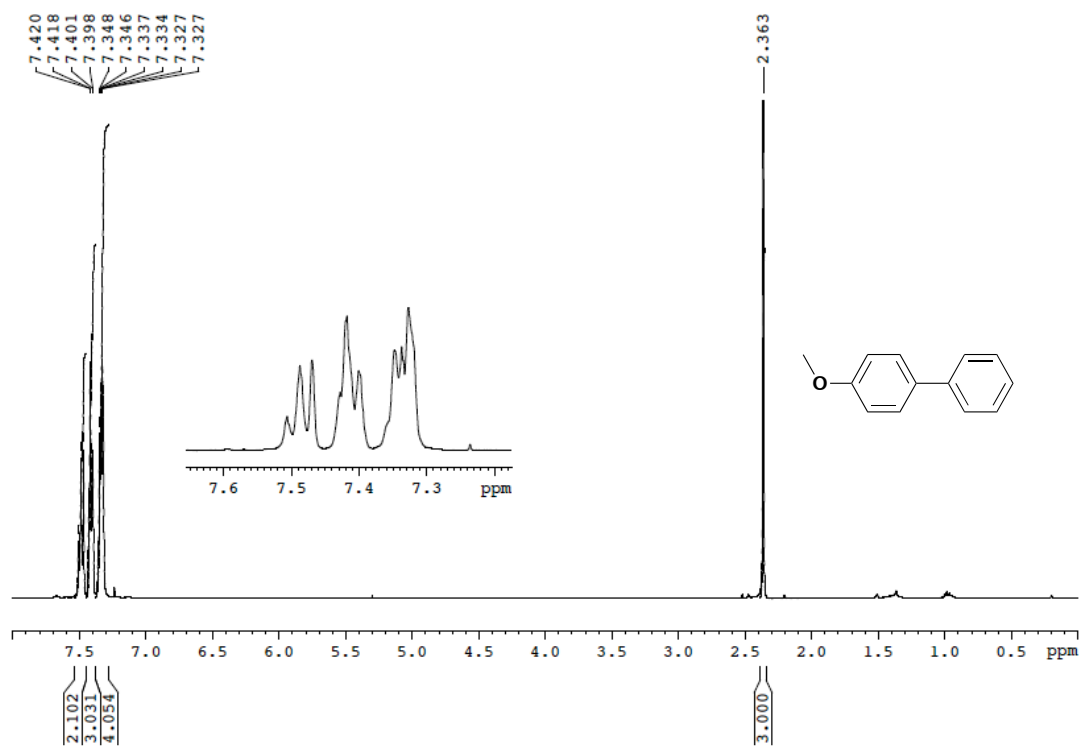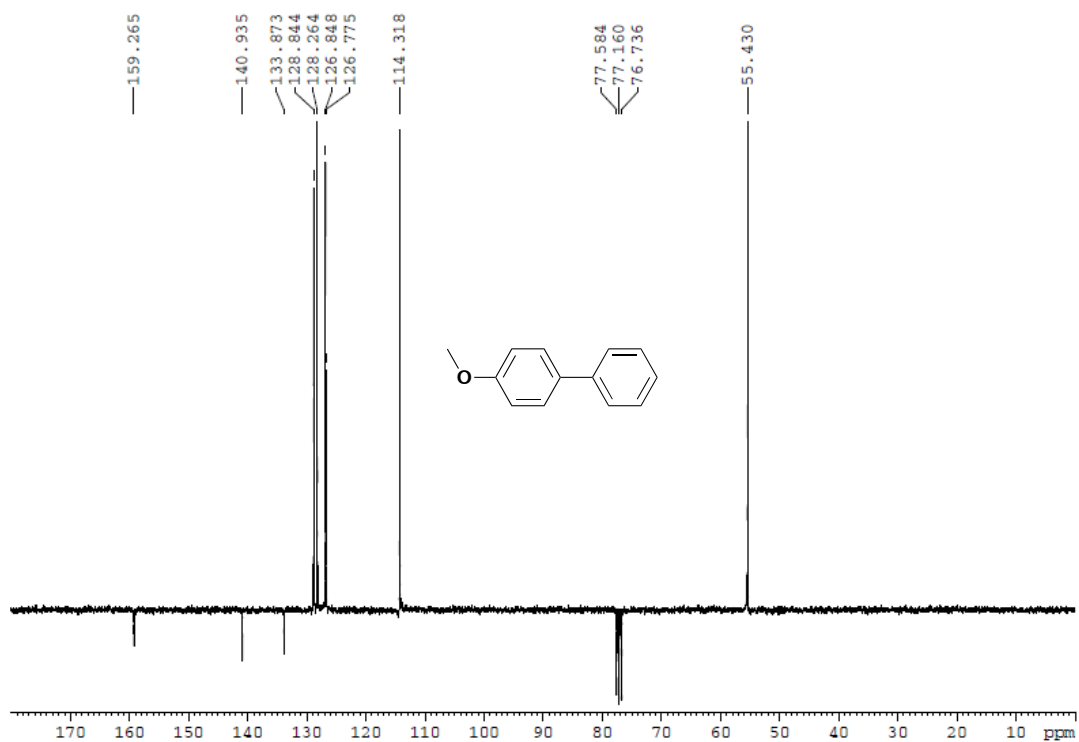

### $^1\text{H}$ and $^{13}\text{C}\{-^1\text{H}\}$ NMR spectra of 2-methylbiphenyl

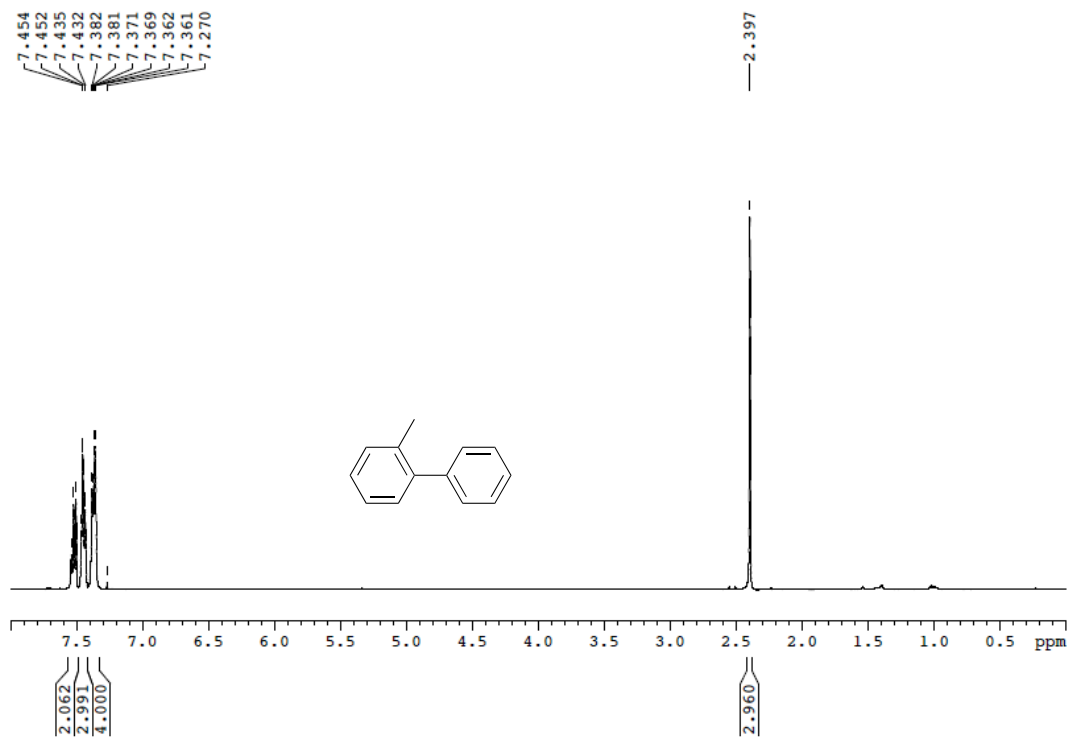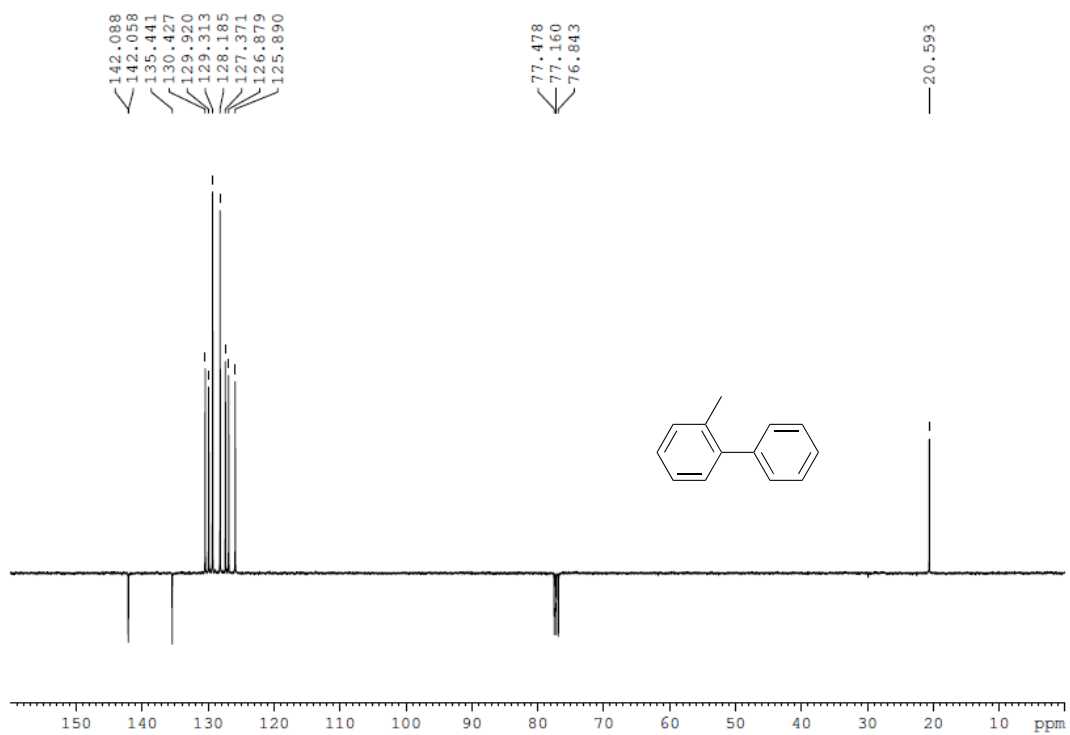

## $^1\text{H}$ and $^{13}\text{C}\{-^1\text{H}\}$ NMR spectra of 2,6-dimethylbiphenyl

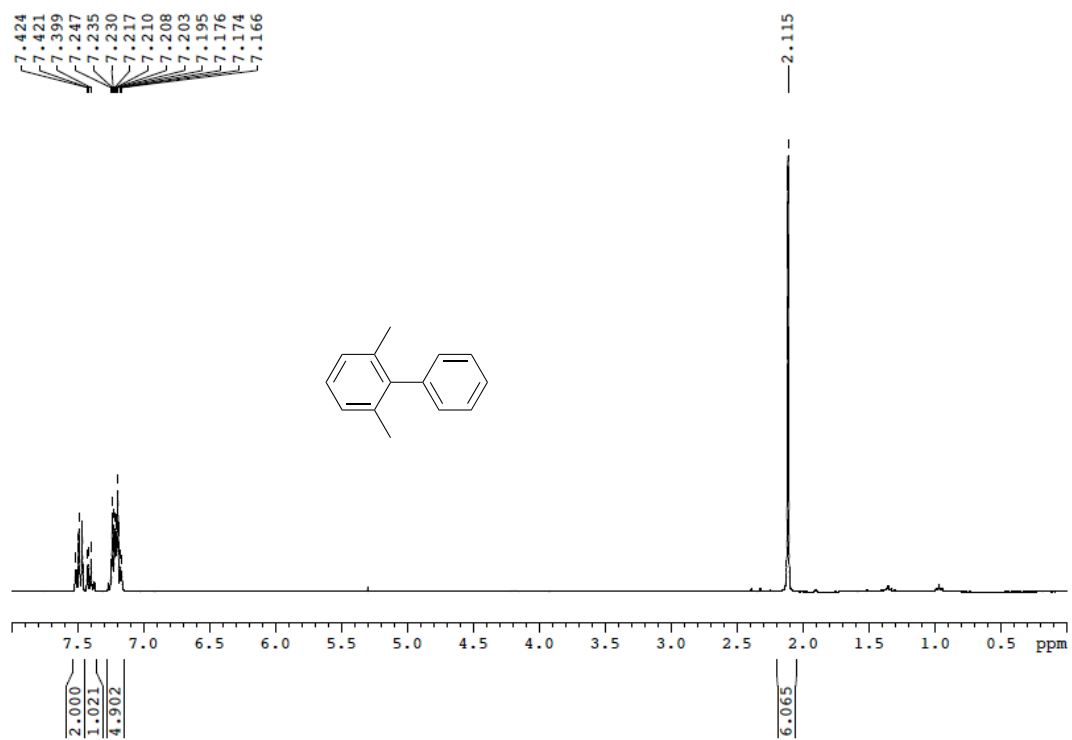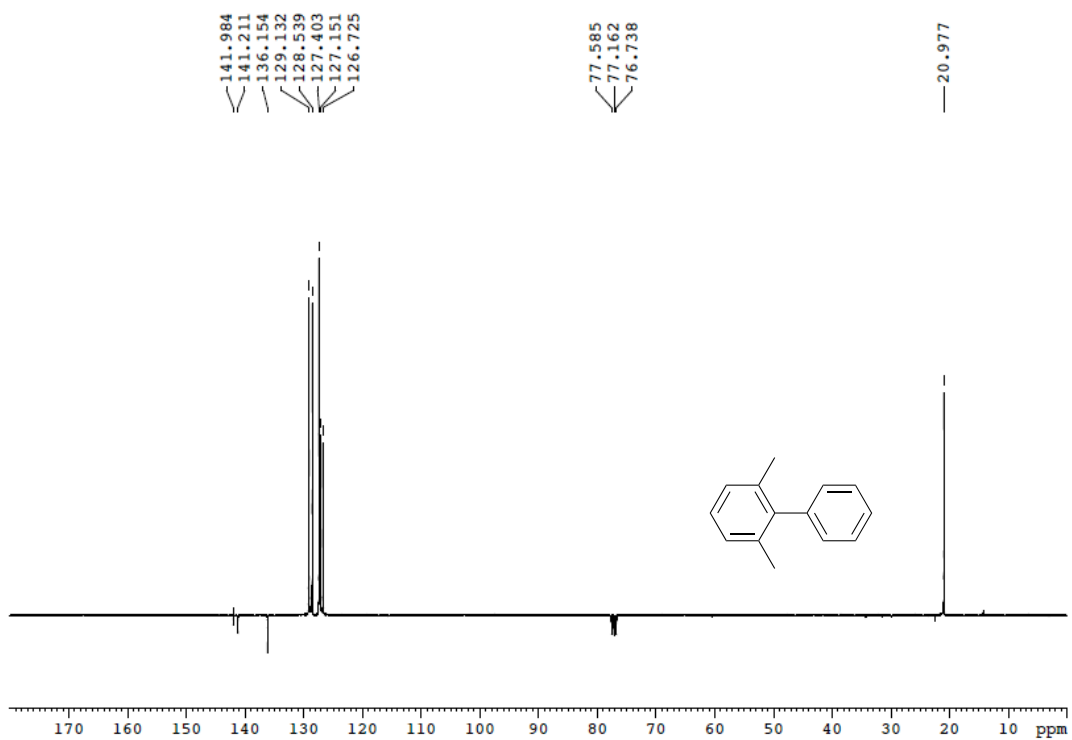

### $^1\text{H}$ and $^{13}\text{C}\{-^1\text{H}\}$ NMR spectra of 9-phenylanthracene

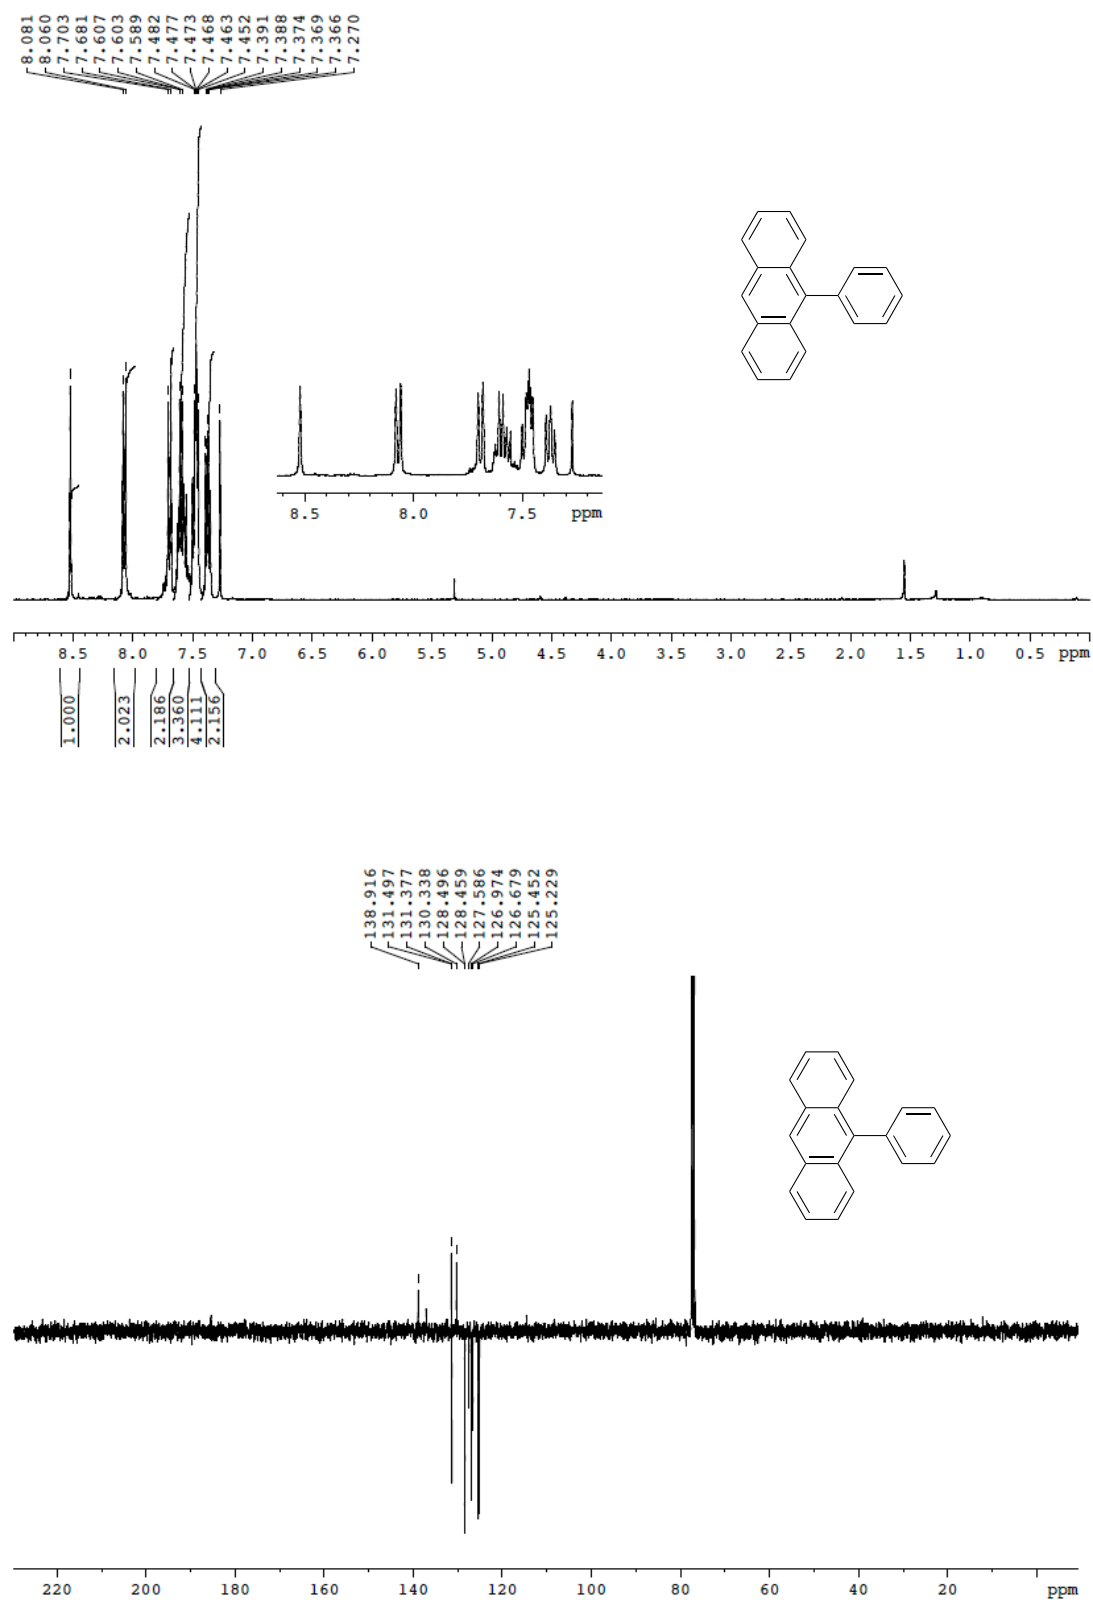



# $^1\text{H}$ and $^{13}\text{C}\{-^1\text{H}\}$ NMR spectra of 2,2'-dimethylbiphenyl

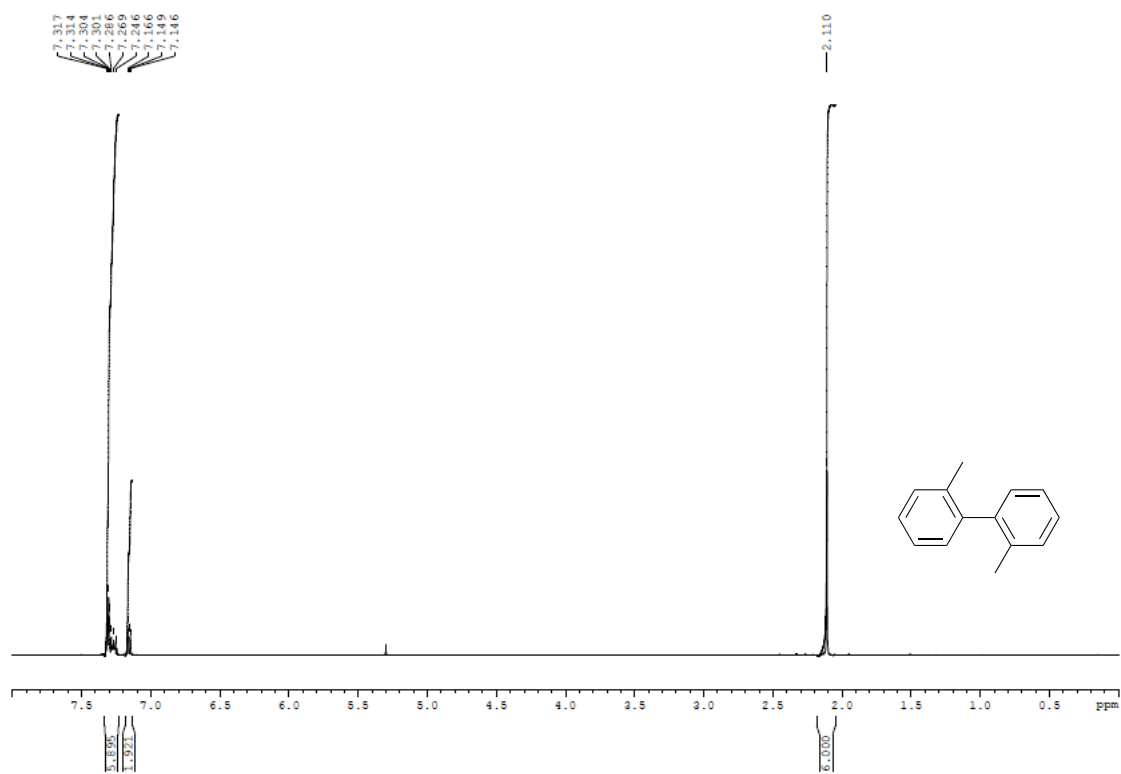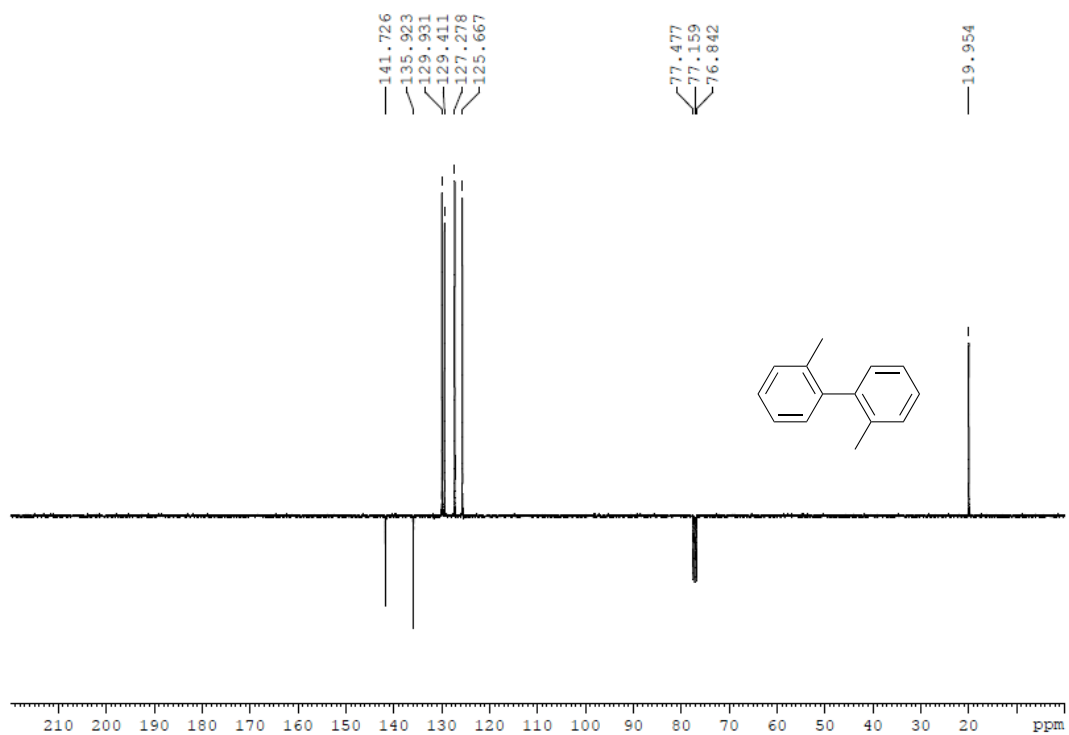

# $^1\text{H}$ and $^{13}\text{C}\{-^1\text{H}\}$ NMR Spectra of 2,2',6-trimethylbiphenyl

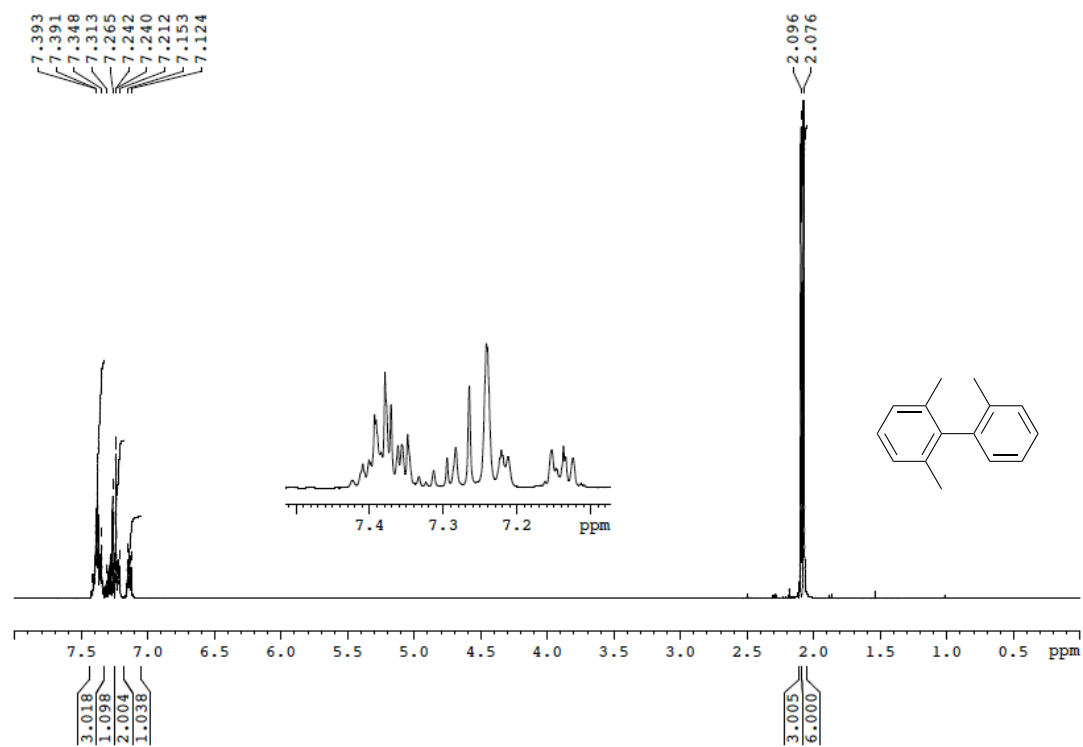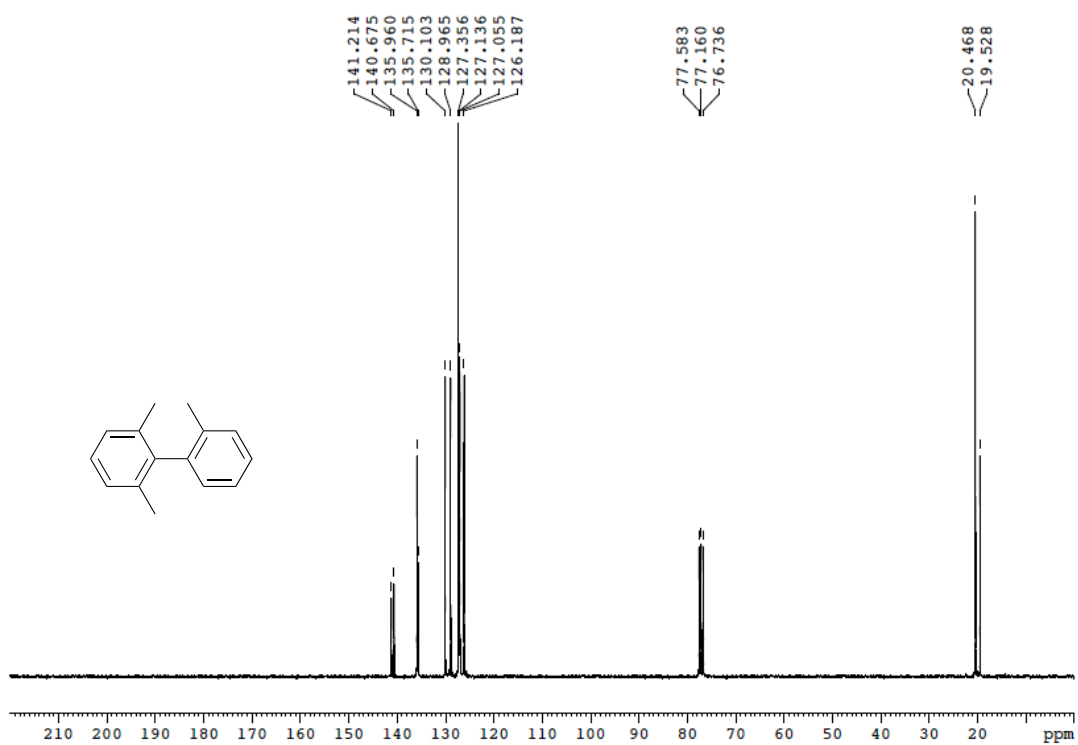

### $^1\text{H}$ and $^{13}\text{C}\{-^1\text{H}\}$ NMR spectra of 2,2',4,6-tetramethylbiphenyl:

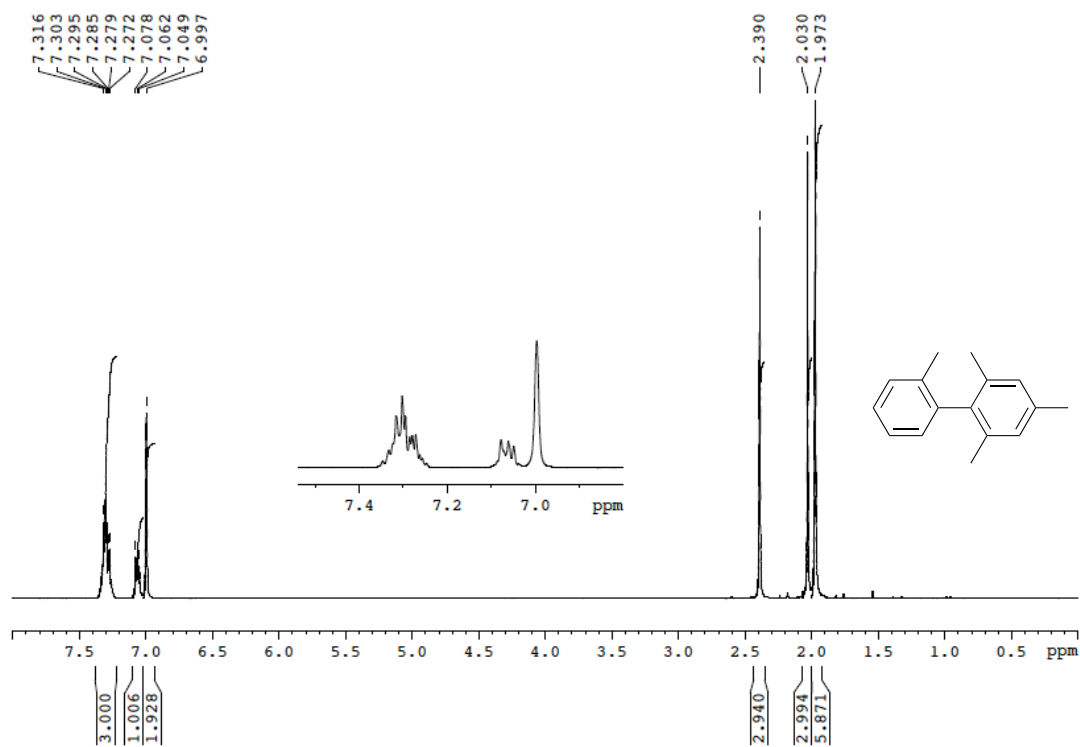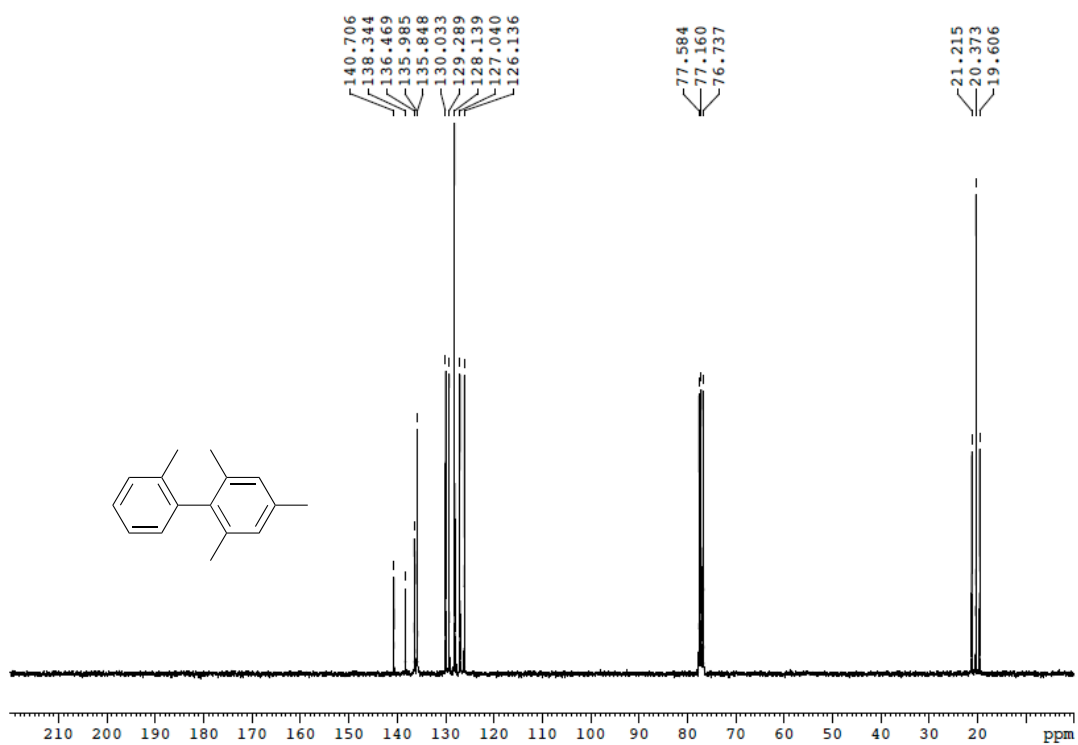

# $^1\text{H}$ and $^{13}\text{C}\{-^1\text{H}\}$ NMR spectra of 2,4,6-trimethyl-2'-methoxybiphenyl

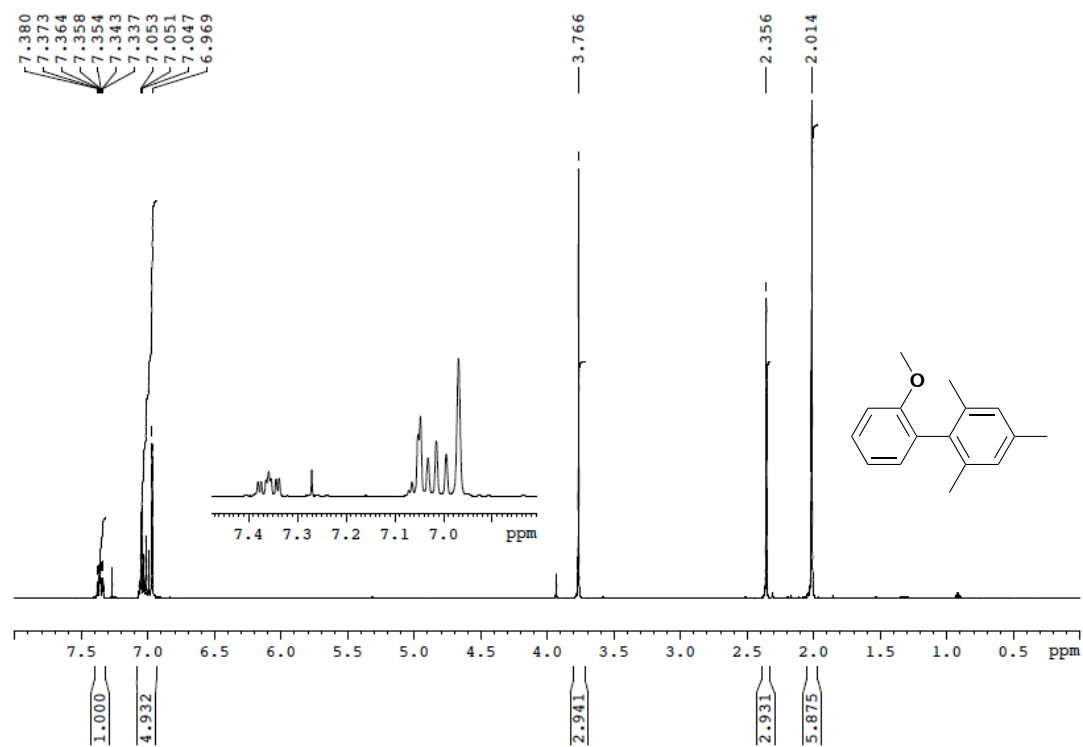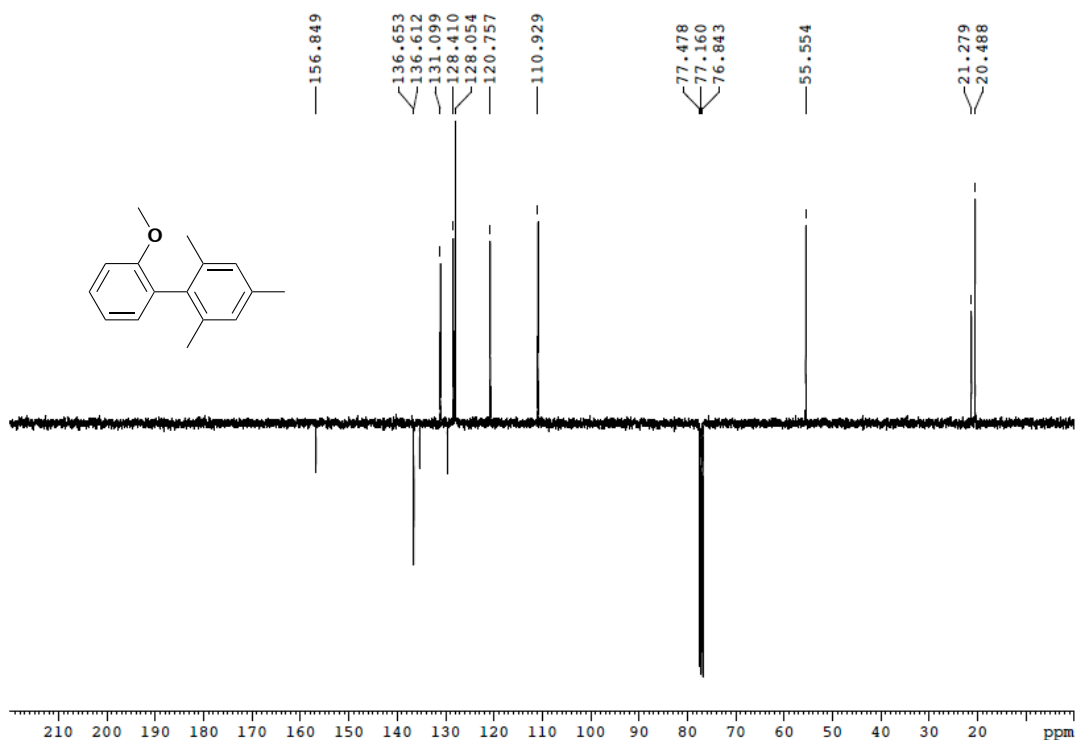

# $^1\text{H}$ and $^{13}\text{C}\{-^1\text{H}\}$ NMR Spectra of 2-*o*-tolylbiphenyl

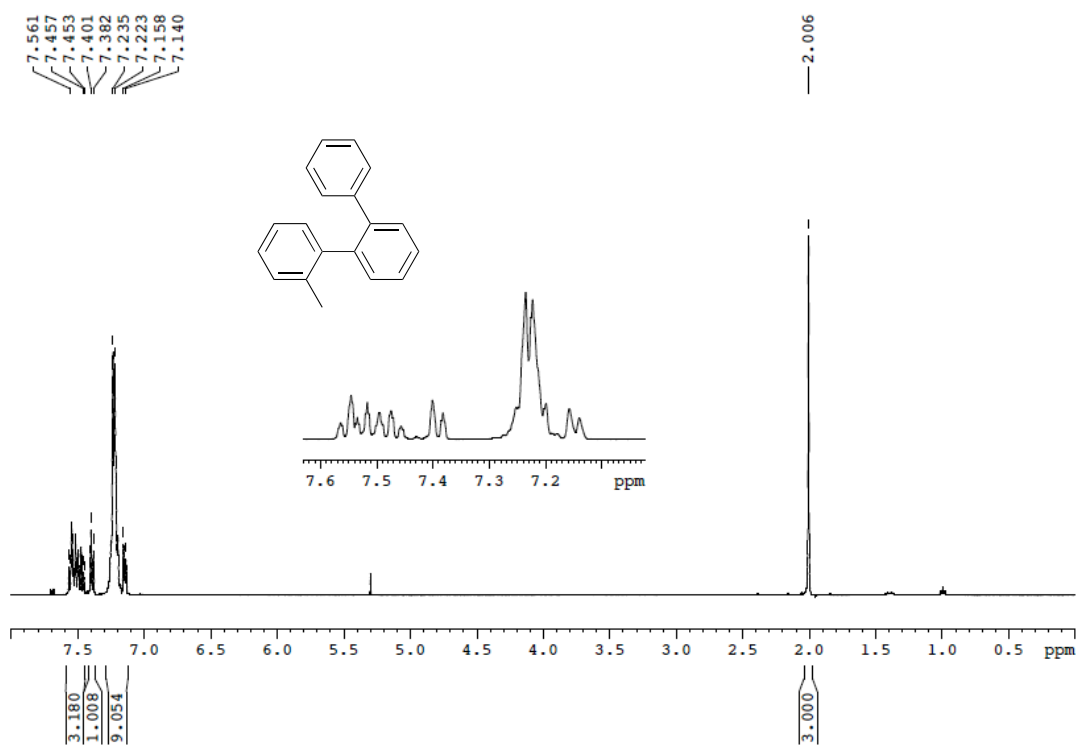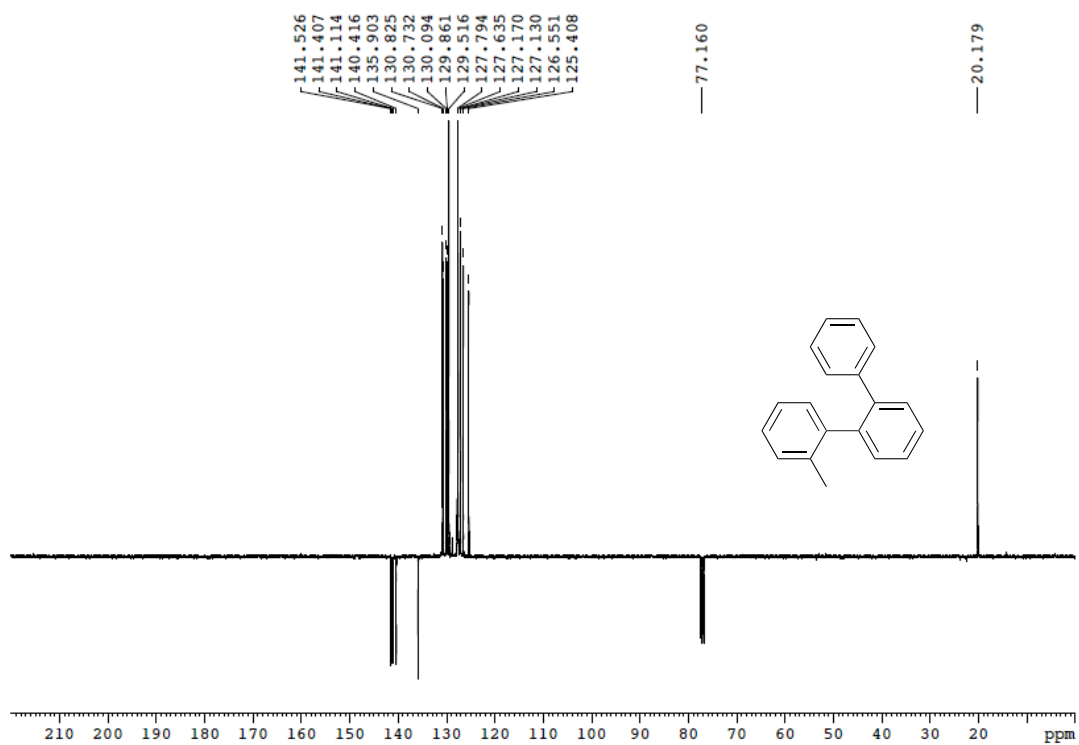

# $^1\text{H}$ and $^{13}\text{C}\{-^1\text{H}\}$ NMR spectra of 2-phenyl-2'-methoxybiphenyl

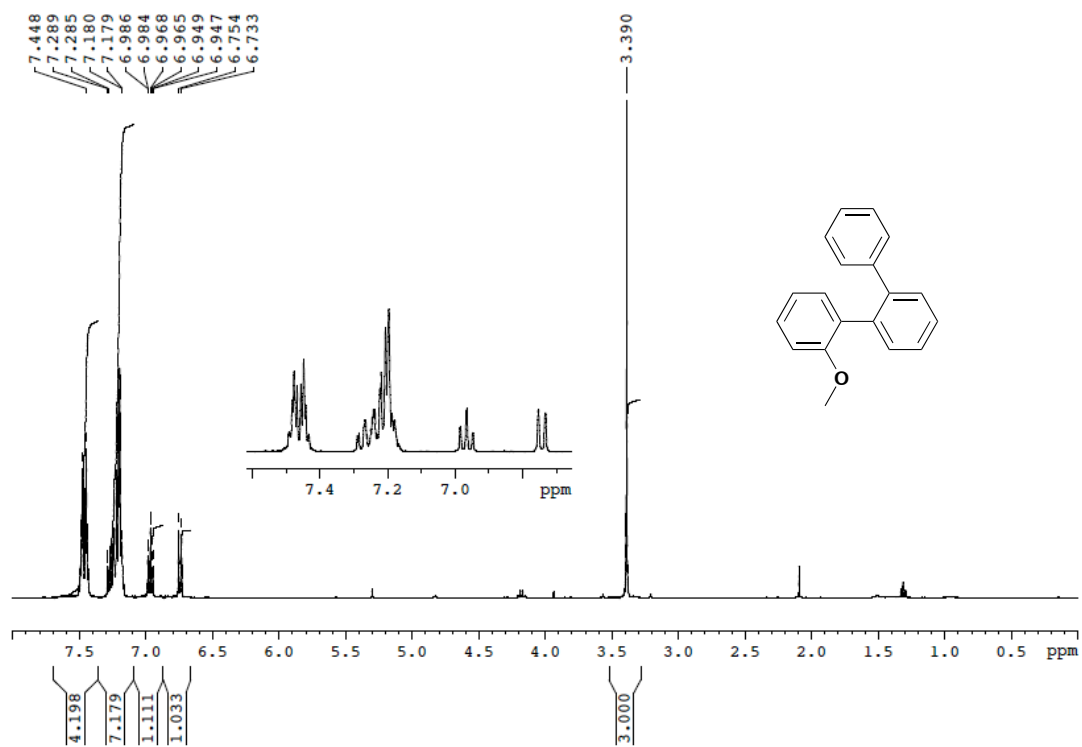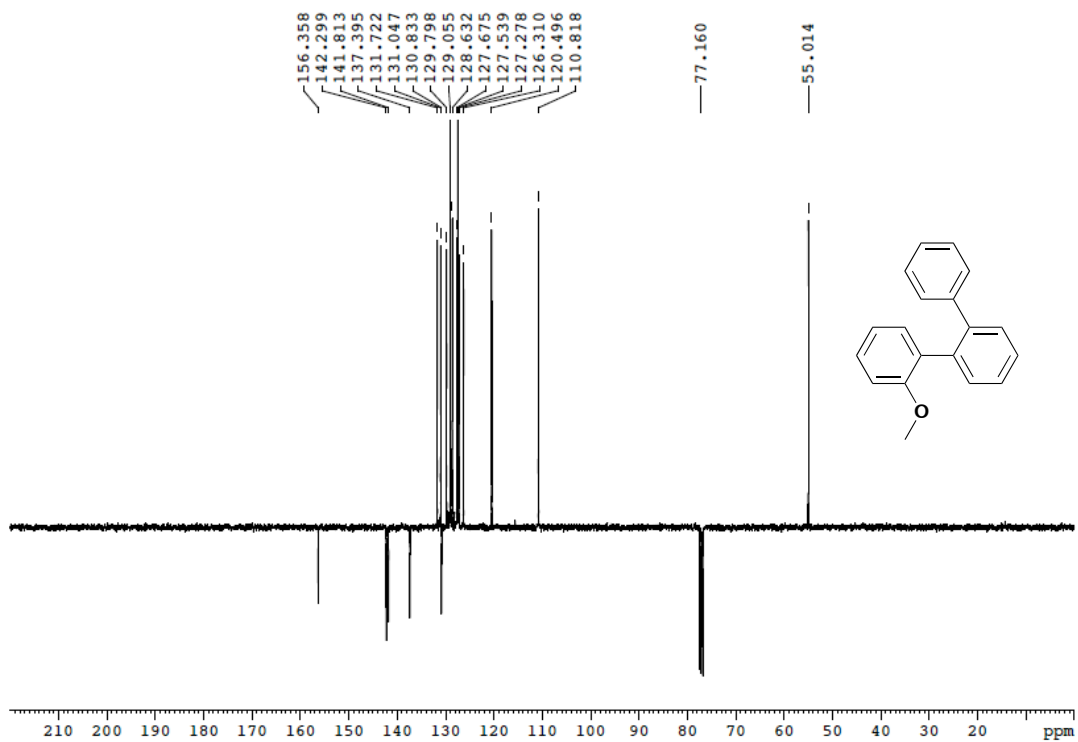

### $^1\text{H}$ and $^{13}\text{C}\{-^1\text{H}\}$ NMR spectra of 2-phenyl,4'-methylbiphenyl

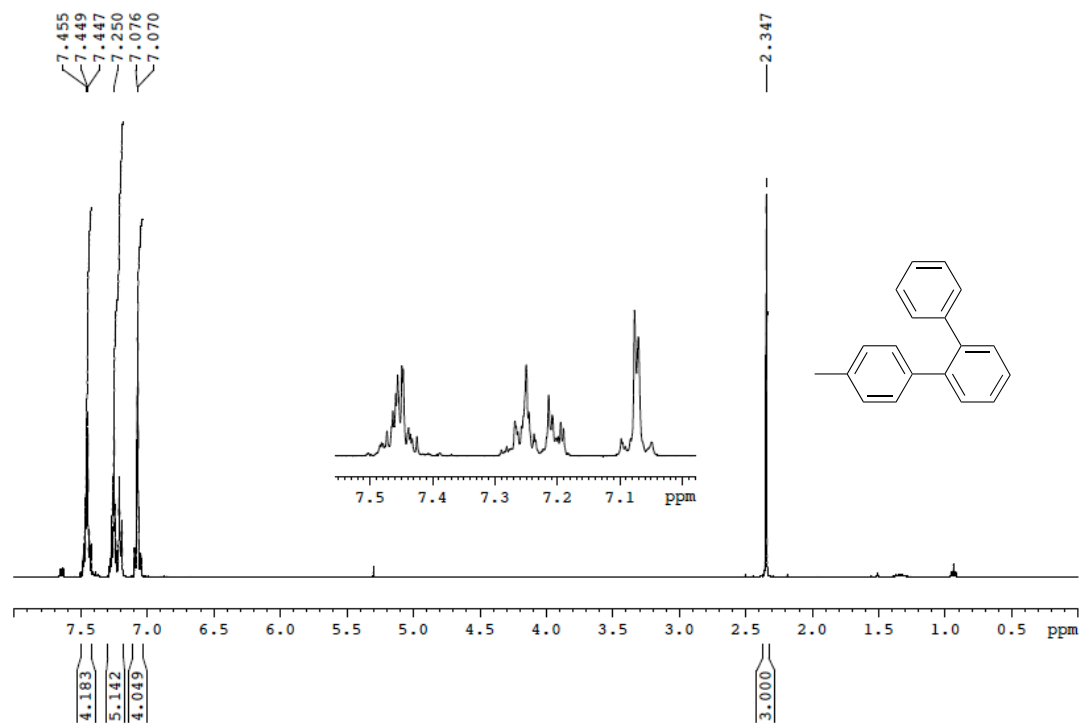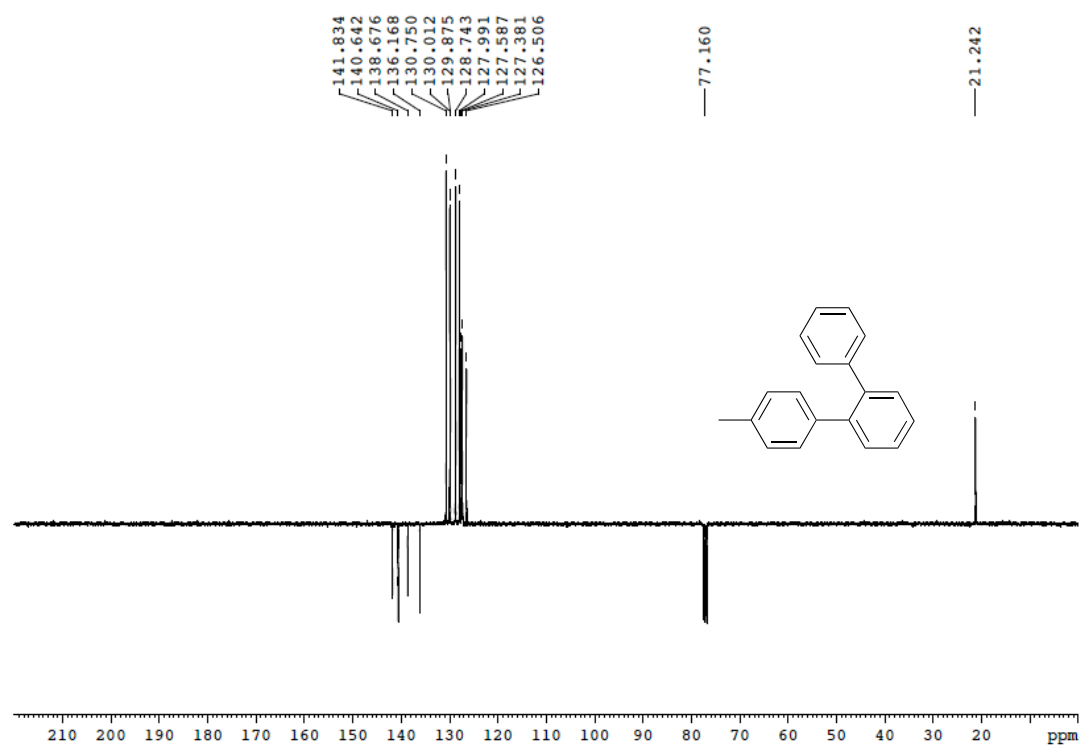

### $^1\text{H}$ and $^{13}\text{C}\{-^1\text{H}\}$ NMR spectra of 9-(2-methoxyphenyl)anthracene:

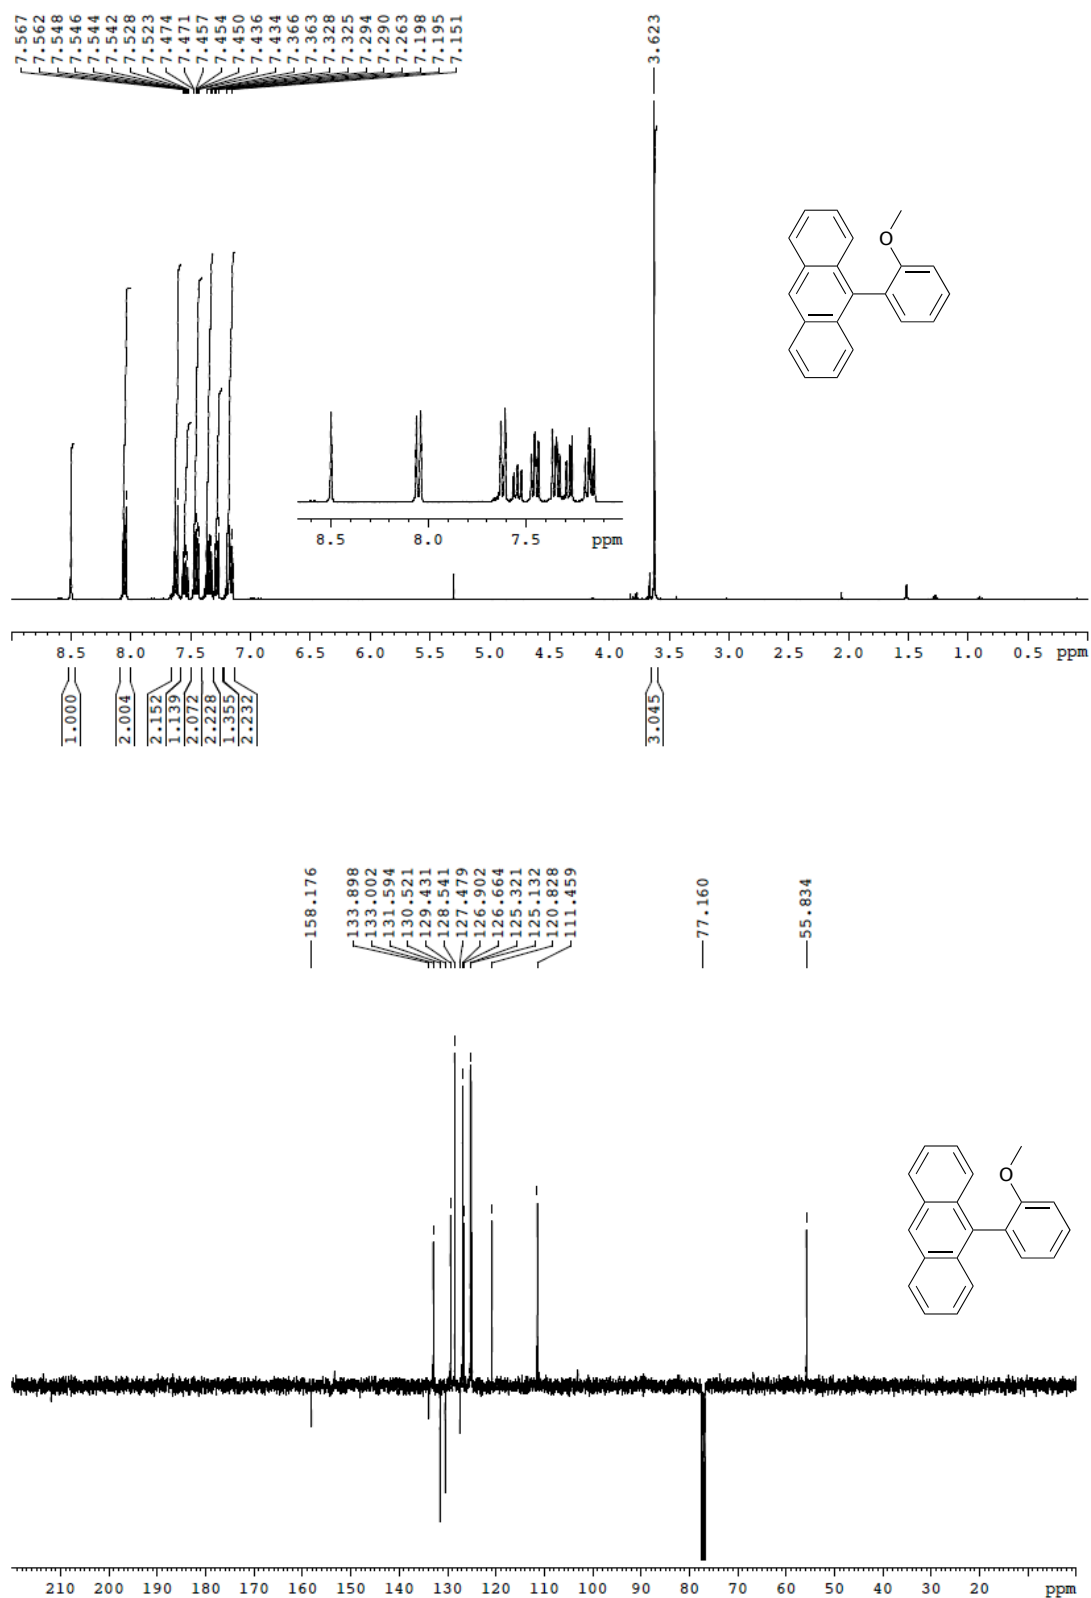



# $^1\text{H}$ and $^{13}\text{C}\{-^1\text{H}\}$ NMR spectra of 9-(*o*-biphenyl)anthracene

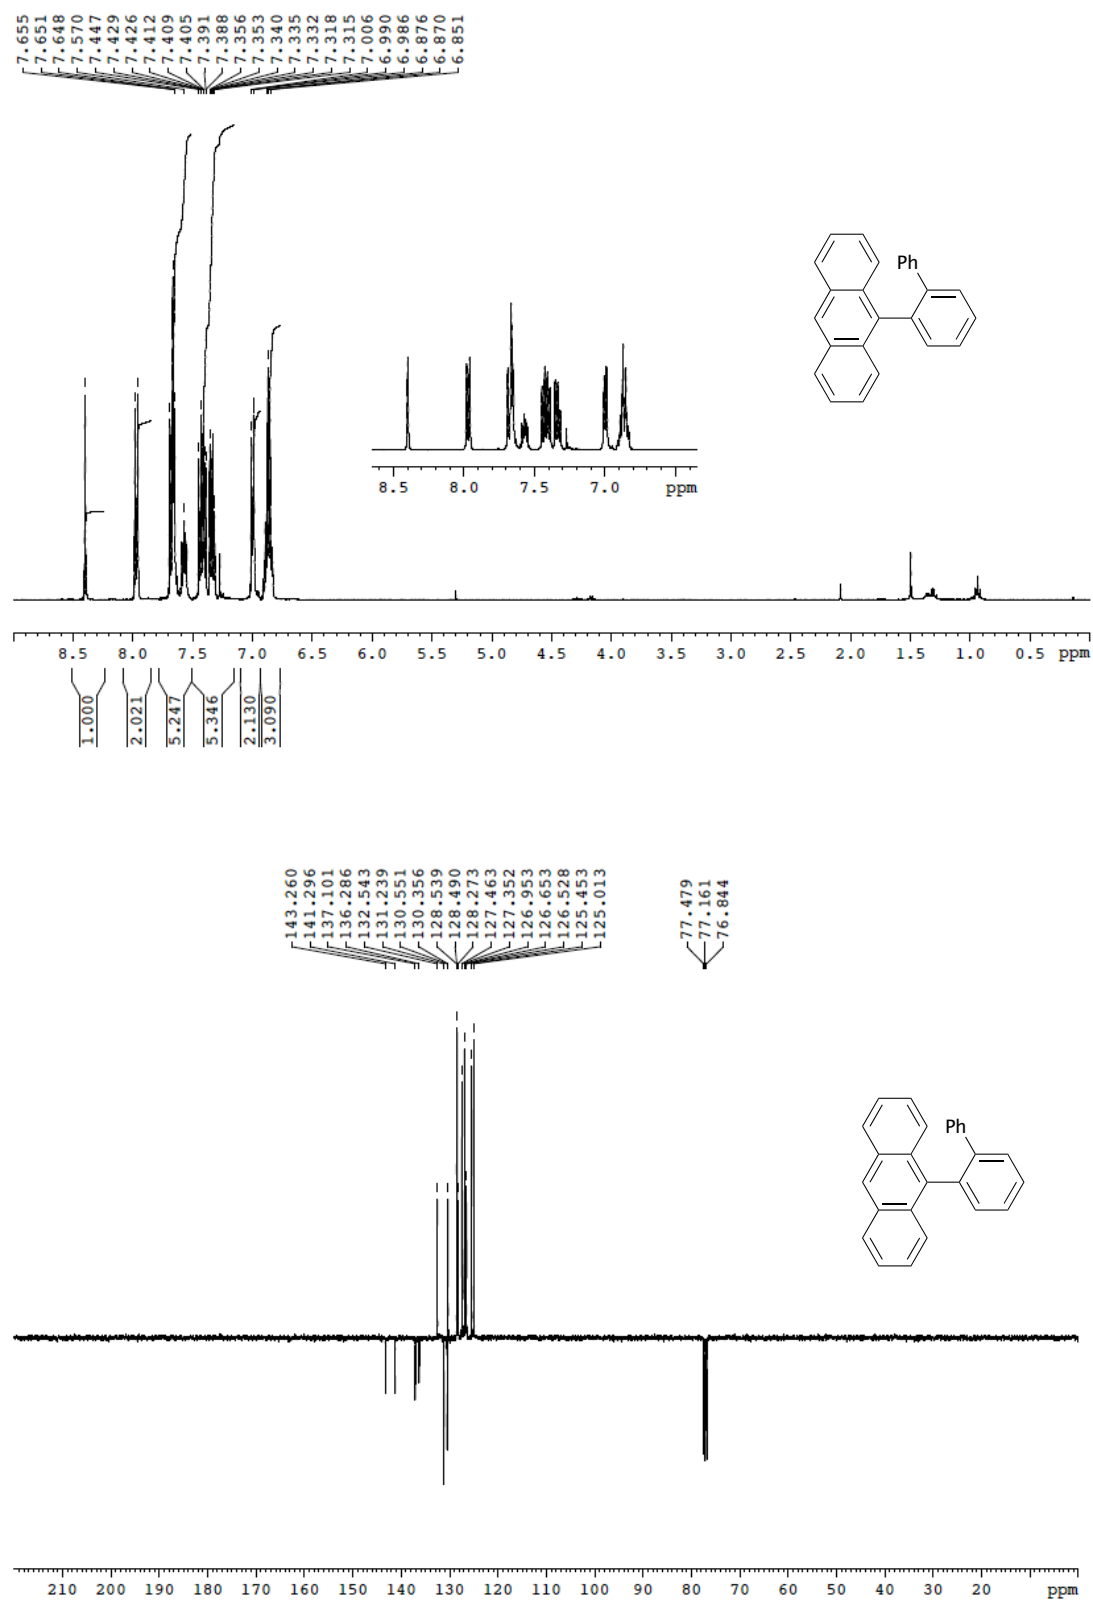

### $^1\text{H}$ and $^{13}\text{C}\{-^1\text{H}\}$ NMR spectra of 2-phenylpyridine

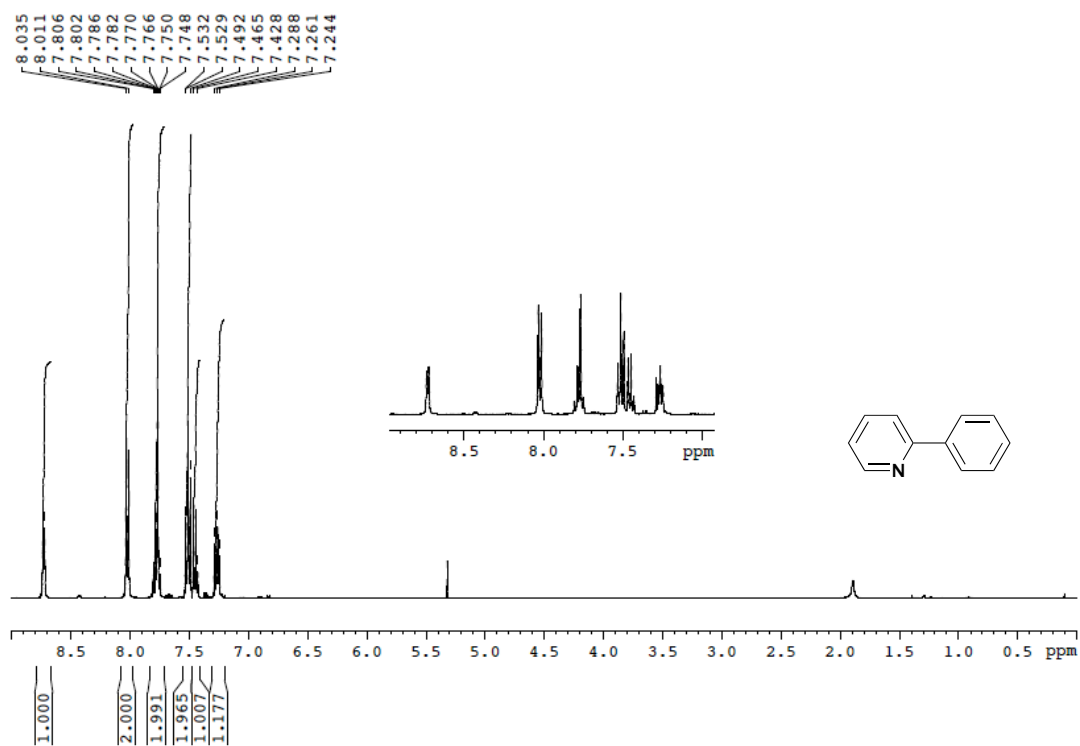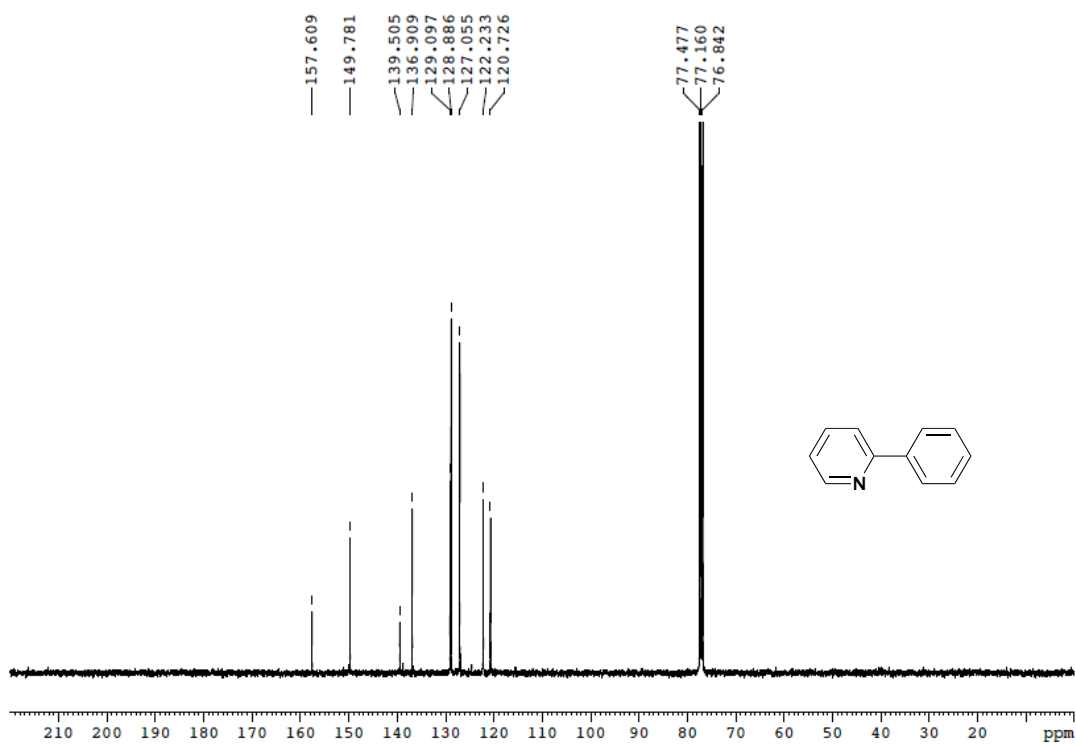

### $^1\text{H}$ and $^{13}\text{C}\{-^1\text{H}\}$ NMR spectra of 3-phenylpyridine

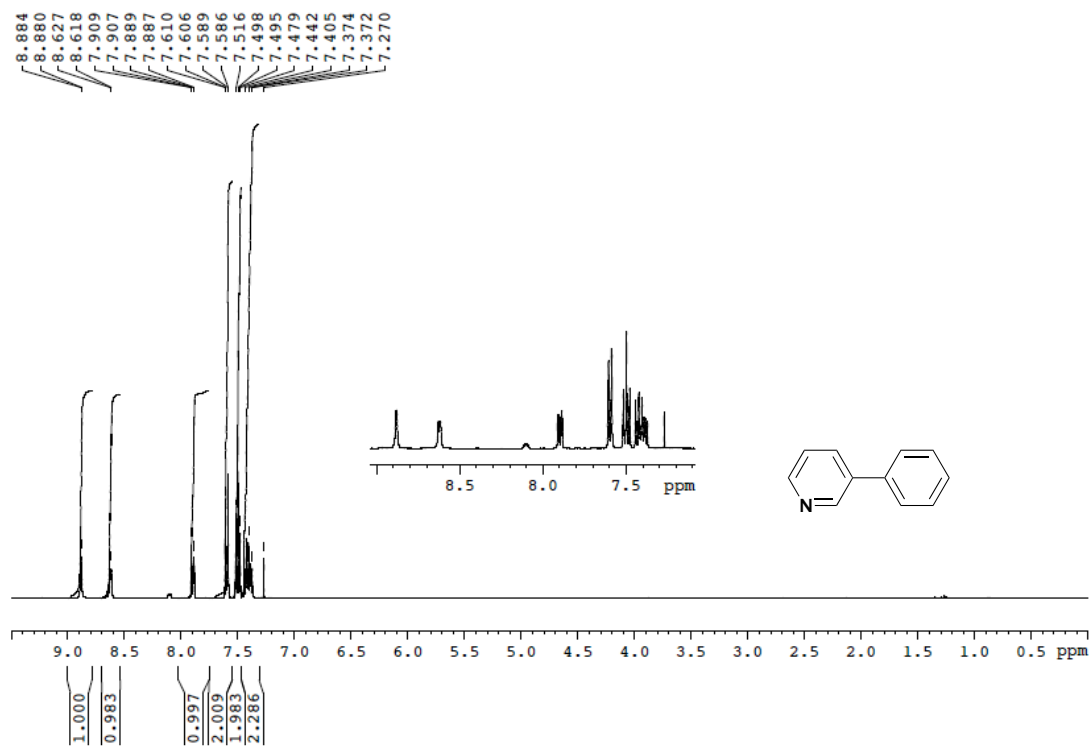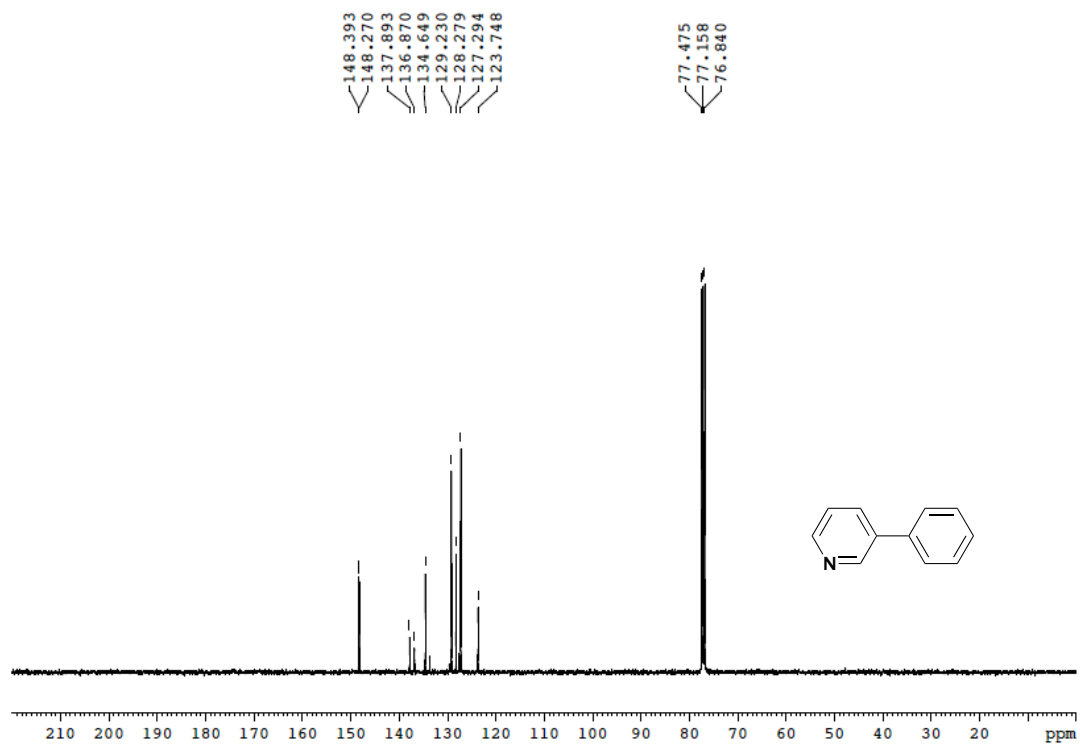

# $^1\text{H}$ and $^{13}\text{C}\{-^1\text{H}\}$ NMR spectra of diphenylmethane

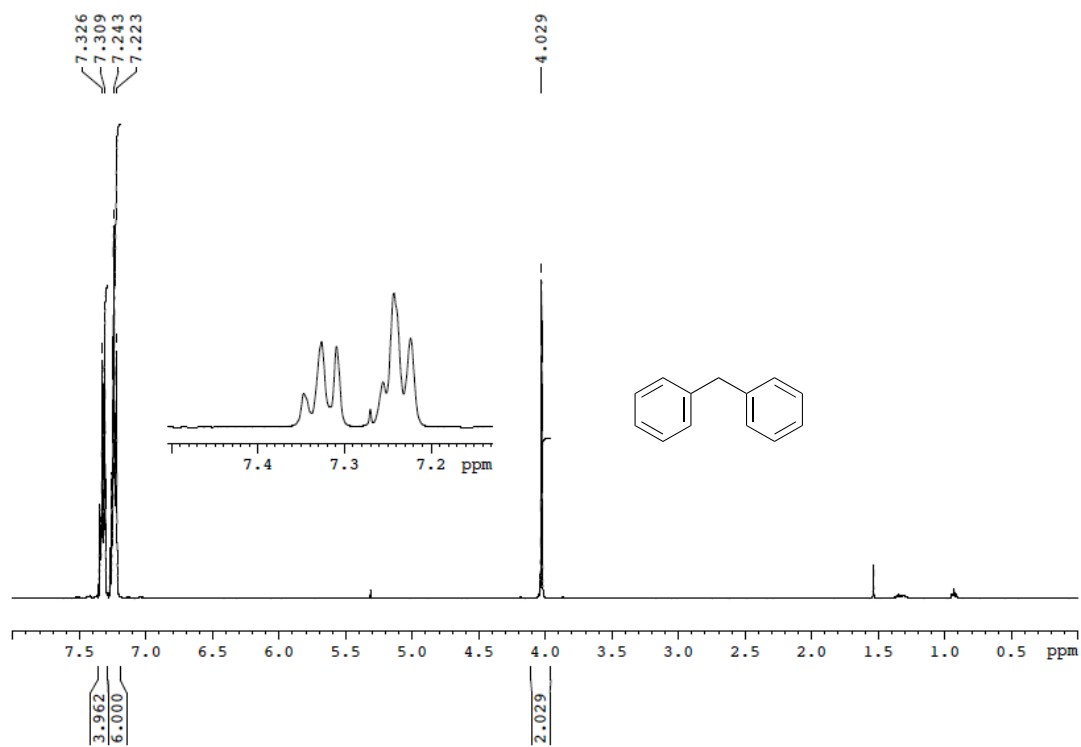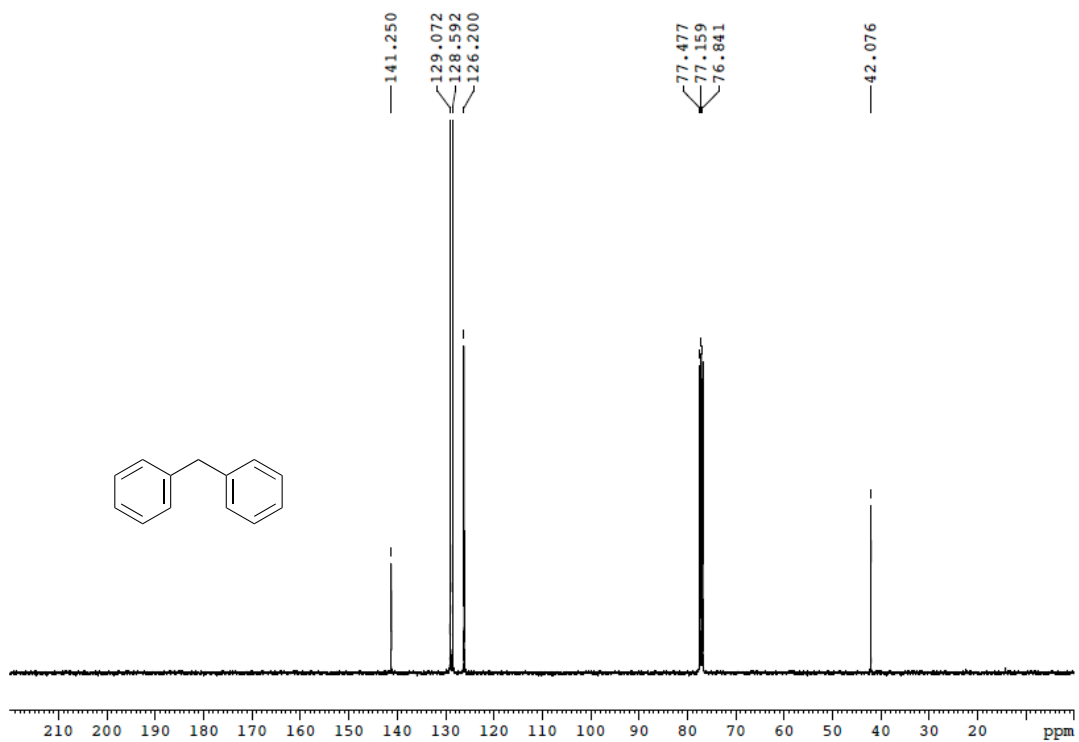

# $^1\text{H}$ and $^{13}\text{C}\{-^1\text{H}\}$ NMR spectra of 4-formyl-1,1'-biphenyl

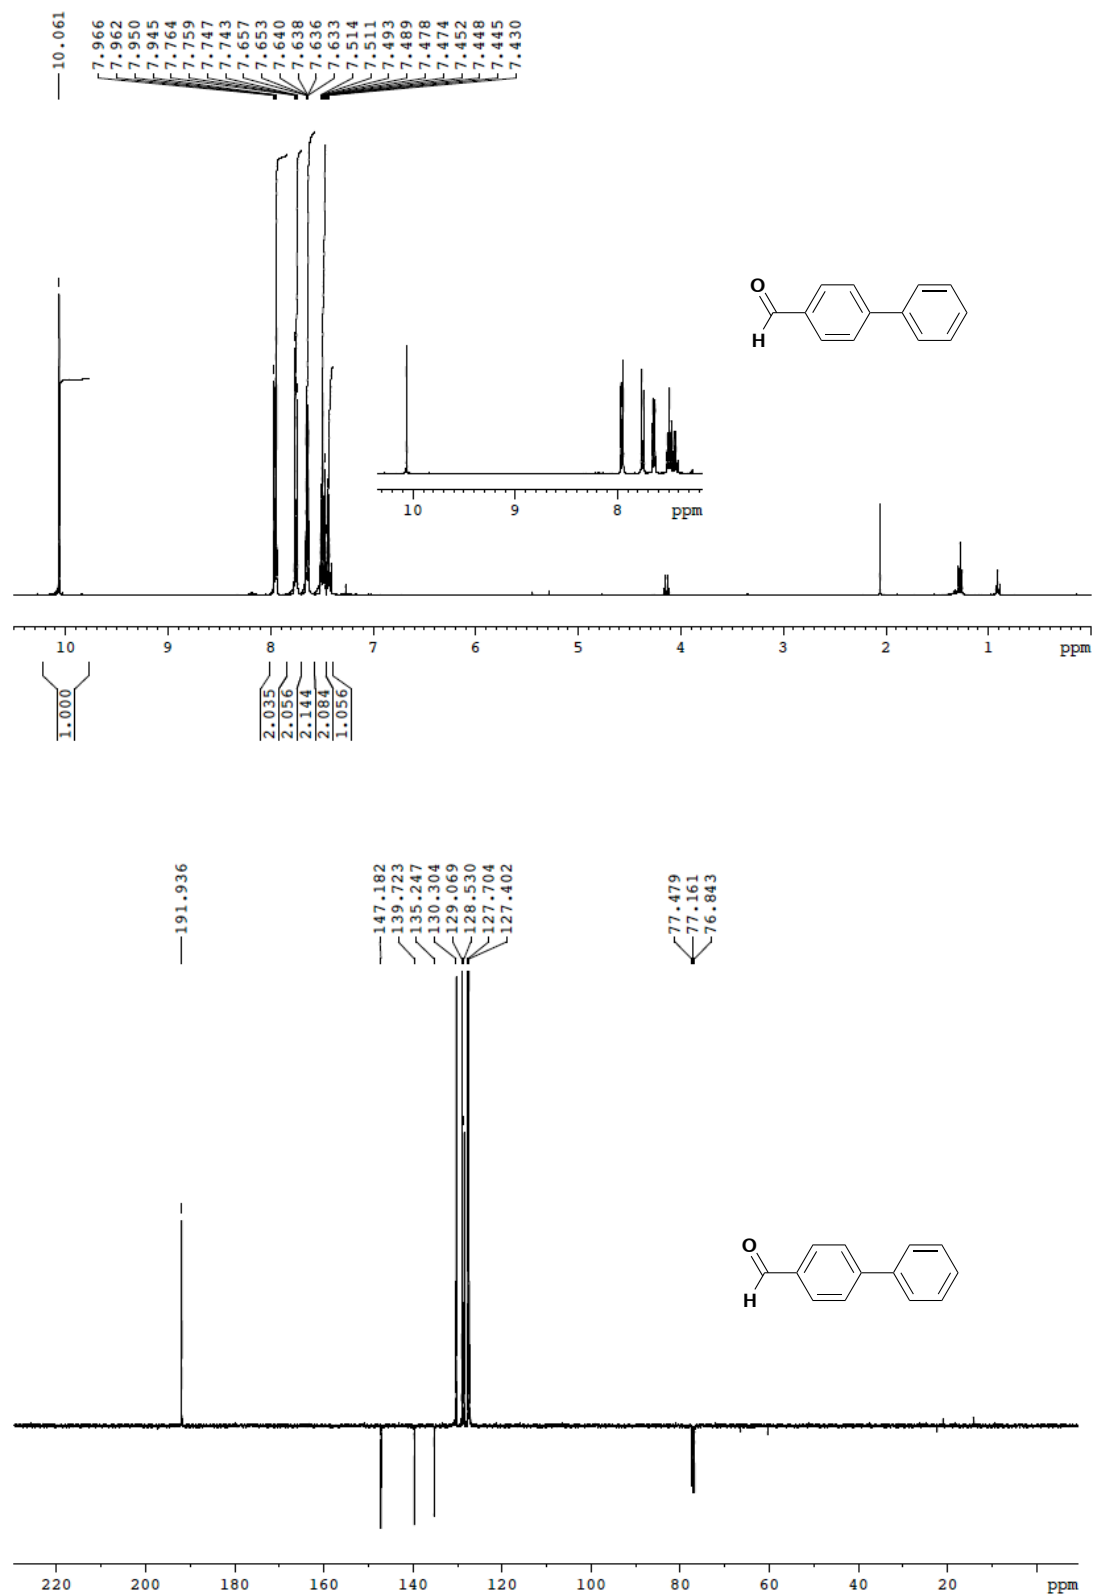

# $^1\text{H}$ and $^{13}\text{C}$ - $\{^1\text{H}\}$ NMR spectra of 4-phenyl-7-(trifluoromethyl)quinoline

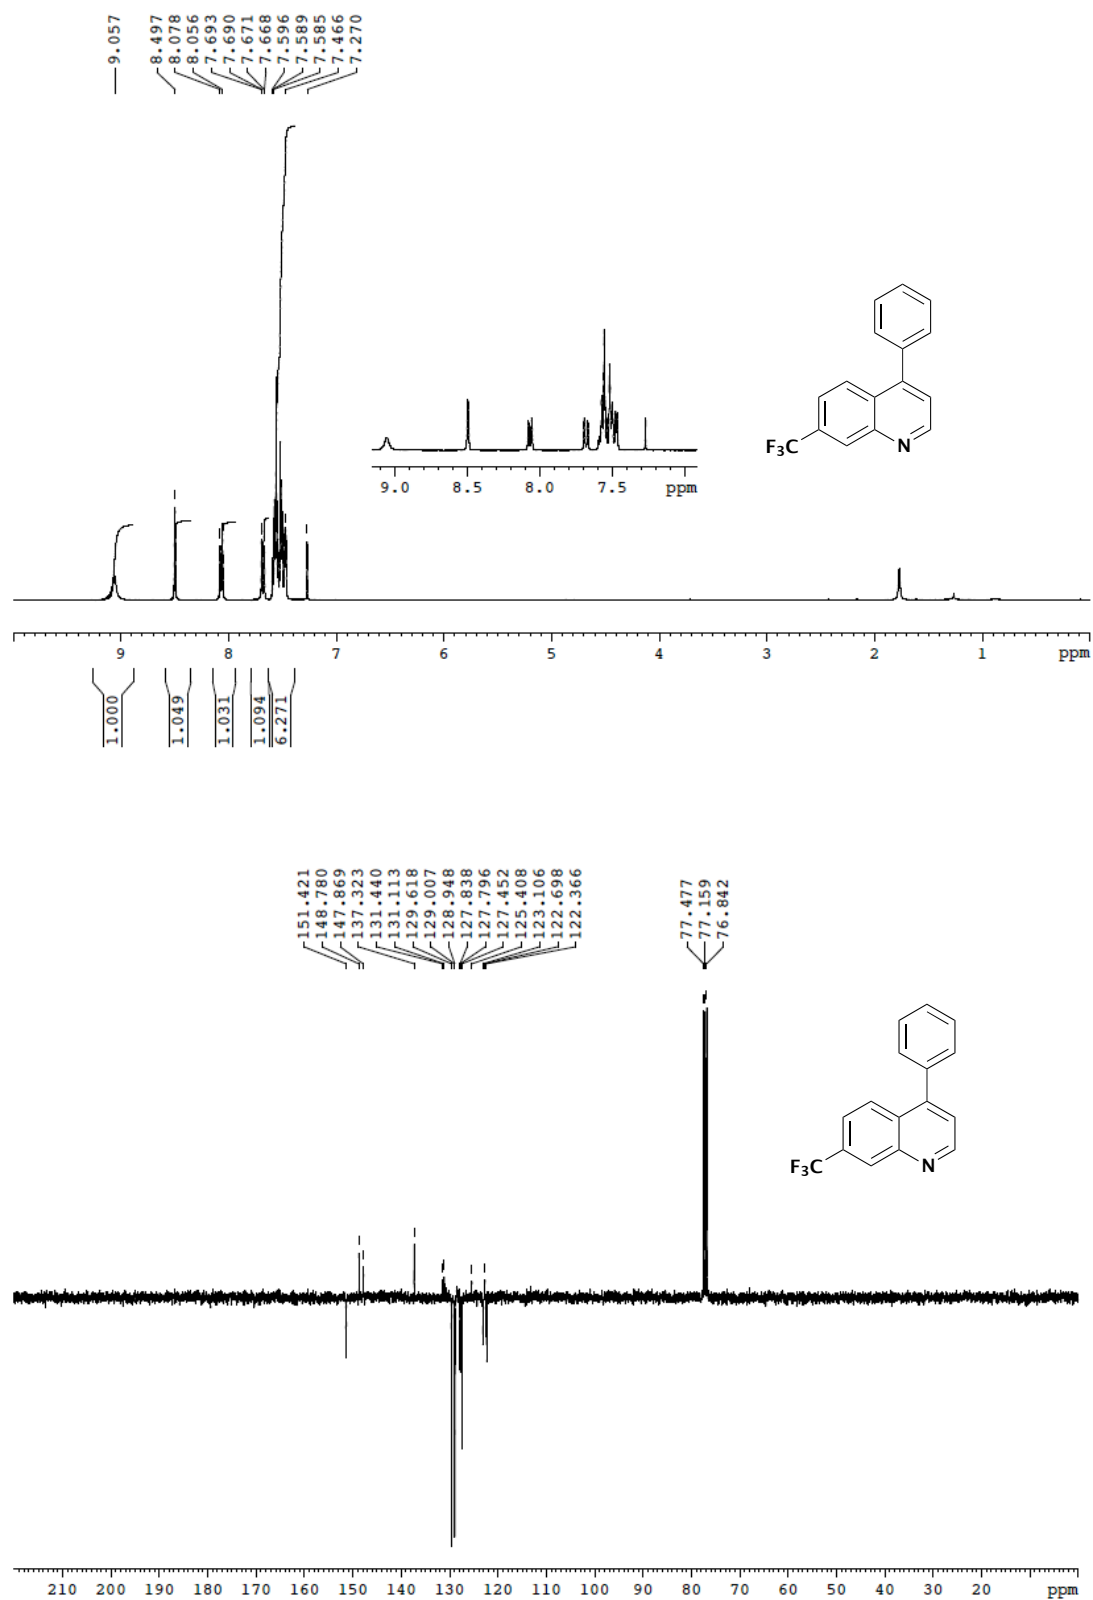

## Crystal data and structure refinement

### [PdCl<sub>2</sub>(IPr){PPh<sub>3</sub>}] (2a)

|                                   |                                                                    |         |
|-----------------------------------|--------------------------------------------------------------------|---------|
| Empirical formula                 | C <sub>45</sub> H <sub>51</sub> Cl <sub>2</sub> N <sub>2</sub> PPd |         |
| Formula weight                    | 828.15                                                             |         |
| Temperature                       | 93(2) K                                                            |         |
| Wavelength                        | 0.71073 Å                                                          |         |
| Crystal system                    | Orthorhombic                                                       |         |
| Space group                       | P2(1)2(1)2(1)                                                      |         |
| Unit cell dimensions              | a = 12.7651(7) Å                                                   | α = 90° |
|                                   | b = 13.7447(9) Å                                                   | β = 90° |
|                                   | c = 47.075(3) Å                                                    | γ = 90° |
| Volume                            | 8259.4(8) Å <sup>3</sup>                                           |         |
| Z                                 | 8                                                                  |         |
| Density (calculated)              | 1.332 Mg/m <sup>3</sup>                                            |         |
| Absorption coefficient            | 0.650 mm <sup>-1</sup>                                             |         |
| F(000)                            | 3440                                                               |         |
| Crystal size                      | 0.100 x 0.100 x 0.100 mm <sup>3</sup>                              |         |
| Theta range for data collection   | 2.62 to 27.75°.                                                    |         |
| Index ranges                      | -16 ≤ h ≤ 16, -17 ≤ k ≤ 17, -52 ≤ l ≤ 60                           |         |
| Reflections collected             | 81368                                                              |         |
| Independent reflections           | 17555 [R(int) = 0.0772]                                            |         |
| Completeness to theta = 25.00°    | 99.4 %                                                             |         |
| Absorption correction             | Multiscan                                                          |         |
| Max. and min. transmission        | 1.0000 and 0.8295                                                  |         |
| Refinement method                 | Full-matrix least-squares on F <sup>2</sup>                        |         |
| Data / restraints / parameters    | 17555 / 0 / 919                                                    |         |
| Goodness-of-fit on F <sup>2</sup> | 1.046                                                              |         |
| Final R indices [I > 2σ(I)]       | R1 = 0.0546, wR2 = 0.1194                                          |         |
| R indices (all data)              | R1 = 0.0587, wR2 = 0.1221                                          |         |
| Absolute structure parameter      | 0.04(2)                                                            |         |
| Largest diff. peak and hole       | 0.431 and -0.771 e.Å <sup>-3</sup>                                 |         |

## [PdCl<sub>2</sub>(IPr){PCy<sub>3</sub>}] (2b)

|                                   |                                                                    |                |
|-----------------------------------|--------------------------------------------------------------------|----------------|
| Empirical formula                 | C <sub>45</sub> H <sub>69</sub> Cl <sub>2</sub> N <sub>2</sub> PPd |                |
| Formula weight                    | 846.29                                                             |                |
| Temperature                       | 93(2) K                                                            |                |
| Wavelength                        | 0.71073 Å                                                          |                |
| Crystal system                    | Monoclinic                                                         |                |
| Space group                       | P2(1)                                                              |                |
| Unit cell dimensions              | a = 10.687(2) Å                                                    | α = 90°        |
|                                   | b = 14.147(3) Å                                                    | β = 95.572(6)° |
|                                   | c = 15.029(3) Å                                                    | γ = 90°        |
| Volume                            | 2261.5(7) Å <sup>3</sup>                                           |                |
| Z                                 | 2                                                                  |                |
| Density (calculated)              | 1.243 Mg/m <sup>3</sup>                                            |                |
| Absorption coefficient            | 0.595 mm <sup>-1</sup>                                             |                |
| F(000)                            | 896                                                                |                |
| Crystal size                      | 0.1200 x 0.1200 x 0.1000 mm <sup>3</sup>                           |                |
| Theta range for data collection   | 2.24 to 25.33°.                                                    |                |
| Index ranges                      | -8 ≤ h ≤ 12, -16 ≤ k ≤ 17, -18 ≤ l ≤ 17                            |                |
| Reflections collected             | 14317                                                              |                |
| Independent reflections           | 7509 [R(int) = 0.0399]                                             |                |
| Completeness to theta = 25.00°    | 99.7 %                                                             |                |
| Absorption correction             | Multiscan                                                          |                |
| Max. and min. transmission        | 1.0000 and 0.7527                                                  |                |
| Refinement method                 | Full-matrix least-squares on F <sup>2</sup>                        |                |
| Data / restraints / parameters    | 7509 / 1 / 460                                                     |                |
| Goodness-of-fit on F <sup>2</sup> | 0.826                                                              |                |
| Final R indices [I > 2σ(I)]       | R1 = 0.0419, wR2 = 0.0953                                          |                |
| R indices (all data)              | R1 = 0.0498, wR2 = 0.1116                                          |                |
| Absolute structure parameter      | -0.02(3)                                                           |                |
| Largest diff. peak and hole       | 1.130 and -0.732 e.Å <sup>-3</sup>                                 |                |



## [PdCl<sub>2</sub>(IPr){P(*o*-tolyl)<sub>3</sub>}] (2c)

|                                   |                                                                                                                                              |
|-----------------------------------|----------------------------------------------------------------------------------------------------------------------------------------------|
| Empirical formula                 | C <sub>48</sub> H <sub>57</sub> Cl <sub>2</sub> N <sub>2</sub> PPd                                                                           |
| Formula weight                    | 870.23                                                                                                                                       |
| Temperature                       | 93(2) K                                                                                                                                      |
| Wavelength                        | 0.71073 Å                                                                                                                                    |
| Crystal system                    | Tetragonal                                                                                                                                   |
| Space group                       | I-4                                                                                                                                          |
| Unit cell dimensions              | a = 24.122(4) Å                      α = 90°<br>b = 24.122(4) Å                      β = 90°<br>c = 18.253(3) Å                      γ = 90° |
| Volume                            | 10620(3) Å <sup>3</sup>                                                                                                                      |
| Z                                 | 8                                                                                                                                            |
| Density (calculated)              | 1.089 Mg/m <sup>3</sup>                                                                                                                      |
| Absorption coefficient            | 0.509 mm <sup>-1</sup>                                                                                                                       |
| F(000)                            | 3632                                                                                                                                         |
| Crystal size                      | 0.2000 x 0.2000 x 0.2000 mm <sup>3</sup>                                                                                                     |
| Theta range for data collection   | 1.19 to 25.32°.                                                                                                                              |
| Index ranges                      | -23 ≤ h ≤ 29, -26 ≤ k ≤ 29, -17 ≤ l ≤ 21                                                                                                     |
| Reflections collected             | 33423                                                                                                                                        |
| Independent reflections           | 9699 [R(int) = 0.0659]                                                                                                                       |
| Completeness to theta = 25.00°    | 99.9 %                                                                                                                                       |
| Absorption correction             | Multiscan                                                                                                                                    |
| Max. and min. transmission        | 1.0000 and 0.7469                                                                                                                            |
| Refinement method                 | Full-matrix least-squares on F <sup>2</sup>                                                                                                  |
| Data / restraints / parameters    | 9699 / 0 / 487                                                                                                                               |
| Goodness-of-fit on F <sup>2</sup> | 1.085                                                                                                                                        |
| Final R indices [I > 2σ(I)]       | R1 = 0.0541, wR2 = 0.1571                                                                                                                    |
| R indices (all data)              | R1 = 0.0652, wR2 = 0.1662                                                                                                                    |
| Absolute structure parameter      | -0.01(3)                                                                                                                                     |
| Largest diff. peak and hole       | 0.990 and -0.458 e.Å <sup>-3</sup>                                                                                                           |

**[PdCl<sub>2</sub>(IPr){P(<sup>n</sup>Bu)(1-Ad)<sub>2</sub>}]·0.5CH<sub>2</sub>Cl<sub>2</sub> (2d)**

|                                   |                                                                                                                                                                   |
|-----------------------------------|-------------------------------------------------------------------------------------------------------------------------------------------------------------------|
| Empirical formula                 | C <sub>51.50</sub> H <sub>76</sub> Cl <sub>3</sub> N <sub>2</sub> PPd                                                                                             |
| Formula weight                    | 966.86                                                                                                                                                            |
| Temperature                       | 125(2) K                                                                                                                                                          |
| Wavelength                        | 0.71073 Å                                                                                                                                                         |
| Crystal system                    | Triclinic                                                                                                                                                         |
| Space group                       | P-1                                                                                                                                                               |
| Unit cell dimensions              | a = 13.854(3) Å                      α = 93.602(5)°<br>b = 16.741(4) Å                      β = 91.002(6)°<br>c = 21.852(4) Å                      γ = 92.724(7)° |
| Volume                            | 5051.5(18) Å <sup>3</sup>                                                                                                                                         |
| Z                                 | 4                                                                                                                                                                 |
| Density (calculated)              | 1.271 Mg/m <sup>3</sup>                                                                                                                                           |
| Absorption coefficient            | 0.593 mm <sup>-1</sup>                                                                                                                                            |
| F(000)                            | 2044                                                                                                                                                              |
| Crystal size                      | 0.21 x 0.18 x 0.03 mm <sup>3</sup>                                                                                                                                |
| Theta range for data collection   | 0.93 to 25.35°.                                                                                                                                                   |
| Index ranges                      | -16 ≤ h ≤ 15, -20 ≤ k ≤ 20, -26 ≤ l ≤ 25                                                                                                                          |
| Reflections collected             | 39296                                                                                                                                                             |
| Independent reflections           | 18263 [R(int) = 0.1179]                                                                                                                                           |
| Completeness to theta = 25.00°    | 98.8 %                                                                                                                                                            |
| Absorption correction             | Multiscan                                                                                                                                                         |
| Max. and min. transmission        | 1.000 and 0.540                                                                                                                                                   |
| Refinement method                 | Full-matrix least-squares on F <sup>2</sup>                                                                                                                       |
| Data / restraints / parameters    | 18263 / 4 / 1059                                                                                                                                                  |
| Goodness-of-fit on F <sup>2</sup> | 1.340                                                                                                                                                             |
| Final R indices [I > 2σ(I)]       | R1 = 0.0966, wR2 = 0.2788                                                                                                                                         |
| R indices (all data)              | R1 = 0.1360, wR2 = 0.3680                                                                                                                                         |
| Largest diff. peak and hole       | 2.829 and -2.955 e.Å <sup>-3</sup>                                                                                                                                |

## [PdCl<sub>2</sub>(IPr){PCy<sub>2</sub>(*o*-biphenyl)}] (2e)

|                                   |                                                                                                     |
|-----------------------------------|-----------------------------------------------------------------------------------------------------|
| Empirical formula                 | C <sub>51</sub> H <sub>67</sub> Cl <sub>2</sub> N <sub>2</sub> PPd                                  |
| Formula weight                    | 916.38                                                                                              |
| Temperature                       | 93(2) K                                                                                             |
| Wavelength                        | 0.71075 Å                                                                                           |
| Crystal system                    | Monoclinic                                                                                          |
| Space group                       | P21/n                                                                                               |
| Unit cell dimensions              | a = 11.928(2) Å      α = 90°<br>b = 13.362(3) Å      β = 92.804(5)°<br>c = 30.789(5) Å      γ = 90° |
| Volume                            | 4901(2) Å <sup>3</sup>                                                                              |
| Z                                 | 4                                                                                                   |
| Density (calculated)              | 1.242 Mg/m <sup>3</sup>                                                                             |
| Absorption coefficient            | 0.5545 mm <sup>-1</sup>                                                                             |
| F(000)                            | 1928.00                                                                                             |
| Crystal size                      | 0.10 x 0.10 x 0.10 mm <sup>3</sup>                                                                  |
| Theta range for data collection   | 1.0 to 50.7°.                                                                                       |
| Index ranges                      | -14 ≤ h ≤ 14, -15 ≤ k ≤ 16, -36 ≤ l ≤ 36                                                            |
| Reflections collected             | 29822                                                                                               |
| Independent reflections           | 8941 [R(int) = 0.0546]                                                                              |
| Completeness to theta = 25.00°    | 99.9 %                                                                                              |
| Absorption correction             | Multiscan                                                                                           |
| Max. and min. transmission        | 0.946 and 0.8386                                                                                    |
| Refinement method                 | Full-matrix least-squares on F <sup>2</sup>                                                         |
| Data / restraints / parameters    | 8941 / 0 / 514                                                                                      |
| Goodness-of-fit on F <sup>2</sup> | 0.964                                                                                               |
| Final R indices [I > 2σ(I)]       | R1 = 0.0425, wR2 = 0.0904                                                                           |
| R indices (all data)              | R1 = 0.0681, wR2 = 0.0904                                                                           |
| Largest diff. peak and hole       | 0.44 and -0.51 e.Å <sup>-3</sup>                                                                    |

## [PdCl<sub>2</sub>(IPr)(XPhos)]·1.5CH<sub>2</sub>Cl<sub>2</sub> (2f)

|                                   |                                                                       |                 |
|-----------------------------------|-----------------------------------------------------------------------|-----------------|
| Empirical formula                 | C <sub>61.50</sub> H <sub>88</sub> Cl <sub>5</sub> N <sub>2</sub> PPd |                 |
| Formula weight                    | 1169.96                                                               |                 |
| Temperature                       | 93(2) K                                                               |                 |
| Wavelength                        | 0.71073 Å                                                             |                 |
| Crystal system                    | Triclinic                                                             |                 |
| Space group                       | P-1                                                                   |                 |
| Unit cell dimensions              | a = 12.320(3) Å                                                       | α = 103.505(8)° |
|                                   | b = 12.759(2) Å                                                       | β = 104.578(7)° |
|                                   | c = 21.547(5) Å                                                       | γ = 93.875(9)°  |
| Volume                            | 3158.4(11) Å <sup>3</sup>                                             |                 |
| Z                                 | 2                                                                     |                 |
| Density (calculated)              | 1.230 Mg/m <sup>3</sup>                                               |                 |
| Absorption coefficient            | 0.567 mm <sup>-1</sup>                                                |                 |
| F(000)                            | 1234                                                                  |                 |
| Crystal size                      | 0.12 x 0.12 x 0.03 mm <sup>3</sup>                                    |                 |
| Theta range for data collection   | 2.02 to 25.39°.                                                       |                 |
| Index ranges                      | -14 ≤ h ≤ 14, -12 ≤ k ≤ 15, -25 ≤ l ≤ 25                              |                 |
| Reflections collected             | 32216                                                                 |                 |
| Independent reflections           | 11488 [R(int) = 0.0479]                                               |                 |
| Completeness to theta = 25.00°    | 99.4 %                                                                |                 |
| Absorption correction             | Multiscan                                                             |                 |
| Max. and min. transmission        | 1.000 and 0.849                                                       |                 |
| Refinement method                 | Full-matrix least-squares on F <sup>2</sup>                           |                 |
| Data / restraints / parameters    | 11488 / 2 / 639                                                       |                 |
| Goodness-of-fit on F <sup>2</sup> | 1.045                                                                 |                 |
| Final R indices [I > 2σ(I)]       | R1 = 0.0808, wR2 = 0.2344                                             |                 |
| R indices (all data)              | R1 = 0.0913, wR2 = 0.2451                                             |                 |
| Largest diff. peak and hole       | 3.902 and -1.177 e.Å <sup>-3</sup>                                    |                 |

## [PdCl<sub>2</sub>(IPr)(SPhos)] (2g)

|                                   |                                                                                                                                                        |
|-----------------------------------|--------------------------------------------------------------------------------------------------------------------------------------------------------|
| Empirical formula                 | C <sub>33</sub> H <sub>71</sub> Cl <sub>2</sub> N <sub>2</sub> O <sub>2</sub> PPd                                                                      |
| Formula weight                    | 976.39                                                                                                                                                 |
| Temperature                       | 93(2) K                                                                                                                                                |
| Wavelength                        | 0.71073 Å                                                                                                                                              |
| Crystal system                    | Monoclinic                                                                                                                                             |
| Space group                       | P2(1)/c                                                                                                                                                |
| Unit cell dimensions              | a = 18.580(3) Å                      α = 90°<br>b = 14.0874(19) Å                     β = 90.472(3)°<br>c = 19.401(3) Å                        γ = 90° |
| Volume                            | 5077.7(12) Å <sup>3</sup>                                                                                                                              |
| Z                                 | 4                                                                                                                                                      |
| Density (calculated)              | 1.277 Mg/m <sup>3</sup>                                                                                                                                |
| Absorption coefficient            | 0.542 mm <sup>-1</sup>                                                                                                                                 |
| F(000)                            | 2056                                                                                                                                                   |
| Crystal size                      | 0.10 x 0.10 x 0.03 mm <sup>3</sup>                                                                                                                     |
| Theta range for data collection   | 2.10 to 25.36°.                                                                                                                                        |
| Index ranges                      | -21 ≤ h ≤ 22, -16 ≤ k ≤ 16, -23 ≤ l ≤ 23                                                                                                               |
| Reflections collected             | 50611                                                                                                                                                  |
| Independent reflections           | 9288 [R(int) = 0.0564]                                                                                                                                 |
| Completeness to theta = 25.00°    | 99.9 %                                                                                                                                                 |
| Absorption correction             | Multiscan                                                                                                                                              |
| Max. and min. transmission        | 1.000 and 0.893                                                                                                                                        |
| Refinement method                 | Full-matrix least-squares on F <sup>2</sup>                                                                                                            |
| Data / restraints / parameters    | 9288 / 0 / 550                                                                                                                                         |
| Goodness-of-fit on F <sup>2</sup> | 1.109                                                                                                                                                  |
| Final R indices [I > 2σ(I)]       | R1 = 0.0504, wR2 = 0.1297                                                                                                                              |
| R indices (all data)              | R1 = 0.0596, wR2 = 0.1409                                                                                                                              |
| Largest diff. peak and hole       | 1.044 and -0.800 e.Å <sup>-3</sup>                                                                                                                     |

## [Pd( $\mu$ -Cl)(Cl)(SPhos)]<sub>2</sub> (5)

|                                       |                                                                                                                                                        |                              |
|---------------------------------------|--------------------------------------------------------------------------------------------------------------------------------------------------------|------------------------------|
| Empirical Formula                     | C <sub>52</sub> H <sub>70</sub> Cl <sub>4</sub> O <sub>4</sub> P <sub>2</sub> Pd <sub>2</sub>                                                          |                              |
| Formula Weight                        | 1175.68                                                                                                                                                |                              |
| Crystal Color, Habit                  | orange, prism                                                                                                                                          |                              |
| Crystal Dimensions                    | 0.120 X 0.120 X 0.050 mm                                                                                                                               |                              |
| Crystal System                        | triclinic                                                                                                                                              |                              |
| Lattice Type                          | Primitive                                                                                                                                              |                              |
| Lattice Parameters                    | a = 9.390(10) Å                                                                                                                                        | $\alpha$ = 103.70(2)°        |
|                                       | b = 10.444(11) Å                                                                                                                                       | $\beta$ = 103.29(2)°         |
|                                       | c = 13.80(2) Å                                                                                                                                         | $\gamma$ = 96.525(10)°       |
|                                       | V = 1259(3) Å <sup>3</sup>                                                                                                                             |                              |
| Space Group                           | P-1 (#2)                                                                                                                                               |                              |
| Z value                               | 1                                                                                                                                                      |                              |
| Dcalc                                 | 1.551 g/cm <sup>3</sup>                                                                                                                                |                              |
| F000                                  | 604.00                                                                                                                                                 |                              |
| $\mu$ (MoK $\alpha$ )                 | 10.347 cm <sup>-1</sup>                                                                                                                                |                              |
| Diffractometer                        | Saturn70                                                                                                                                               |                              |
| Radiation                             | MoK $\alpha$ ( $\lambda$ = 0.71075 Å)                                                                                                                  |                              |
| Voltage, Current                      | 50kV, 16mA                                                                                                                                             |                              |
| Temperature                           | -180.0°C                                                                                                                                               |                              |
| Detector Aperture                     | 70 x 70 mm                                                                                                                                             |                              |
| Pixel Size                            | 0.034 mm                                                                                                                                               |                              |
| 2 $\theta$ max                        | 50.6°                                                                                                                                                  |                              |
| No. of Reflections Measured           | Total: 11553                                                                                                                                           | Unique: 4471 (Rint = 0.1775) |
| Corrections                           | Lorentz-polarization<br>Absorption<br>(trans. factors: 0.387 - 0.950)                                                                                  |                              |
| Structure Solution                    | Direct Methods                                                                                                                                         |                              |
| Refinement                            | Full-matrix least-squares on F <sup>2</sup>                                                                                                            |                              |
| Function Minimized                    | $\Sigma w (F_o^2 - F_c^2)^2$                                                                                                                           |                              |
| Least Squares Weights                 | w = 1 / [ $\sigma^2(F_o^2) + (0.2000 \cdot P)^2 + 0.0000 \cdot P$ ] where P = (Max(F <sub>o</sub> <sup>2</sup> , 0) + 2F <sub>c</sub> <sup>2</sup> )/3 |                              |
| 2 $\theta$ max cutoff                 | 50.6°                                                                                                                                                  |                              |
| Anomalous Dispersion                  | All non-hydrogen atoms                                                                                                                                 |                              |
| No. Observations (All reflections)    | 4471                                                                                                                                                   |                              |
| No. Variables                         | 289                                                                                                                                                    |                              |
| Reflection/Parameter Ratio            | 15.47                                                                                                                                                  |                              |
| Residuals: R1 (I > 2.00 $\sigma$ (I)) | 0.1309                                                                                                                                                 |                              |
| Residuals: R (All reflections)        | 0.1367                                                                                                                                                 |                              |
| Residuals: wR2 (All reflections)      | 0.3519                                                                                                                                                 |                              |
| Goodness of Fit Indicator             | 1.404                                                                                                                                                  |                              |
| Max Shift/Error in Final Cycle        | 0.003                                                                                                                                                  |                              |
| Maximum peak in Final Diff. Map       | 3.78 e-/Å <sup>3</sup>                                                                                                                                 |                              |
| Minimum peak in Final Diff. Map       | -4.06 e-/Å <sup>3</sup>                                                                                                                                |                              |

## [Pd(IPr)(SPhos)] (6)

|                                   |                                                                                                                                                        |
|-----------------------------------|--------------------------------------------------------------------------------------------------------------------------------------------------------|
| Empirical formula                 | C <sub>53</sub> H <sub>71</sub> N <sub>2</sub> O <sub>2</sub> PPd                                                                                      |
| Formula weight                    | 905.49                                                                                                                                                 |
| Temperature                       | 93(2) K                                                                                                                                                |
| Wavelength                        | 0.71073 Å                                                                                                                                              |
| Crystal system                    | Monoclinic                                                                                                                                             |
| Space group                       | P2(1)/n                                                                                                                                                |
| Unit cell dimensions              | a = 17.831(2) Å                      α = 90°<br>b = 14.5302(19) Å                     β = 99.784(5)°<br>c = 18.802(3) Å                        γ = 90° |
| Volume                            | 4800.7(11) Å <sup>3</sup>                                                                                                                              |
| Z                                 | 4                                                                                                                                                      |
| Density (calculated)              | 1.253 Mg/m <sup>3</sup>                                                                                                                                |
| Absorption coefficient            | 0.461 mm <sup>-1</sup>                                                                                                                                 |
| F(000)                            | 1920                                                                                                                                                   |
| Crystal size                      | 0.150 x 0.150 x 0.150 mm <sup>3</sup>                                                                                                                  |
| Theta range for data collection   | 2.02 to 25.35°.                                                                                                                                        |
| Index ranges                      | -21 ≤ h ≤ 18, -17 ≤ k ≤ 12, -21 ≤ l ≤ 22                                                                                                               |
| Reflections collected             | 25152                                                                                                                                                  |
| Independent reflections           | 8670 [R(int) = 0.2327]                                                                                                                                 |
| Completeness to theta = 25.00°    | 99.2 %                                                                                                                                                 |
| Absorption correction             | Multiscan                                                                                                                                              |
| Max. and min. transmission        | 1.0000 and 0.5095                                                                                                                                      |
| Refinement method                 | Full-matrix least-squares on F <sup>2</sup>                                                                                                            |
| Data / restraints / parameters    | 8670 / 0 / 532                                                                                                                                         |
| Goodness-of-fit on F <sup>2</sup> | 1.035                                                                                                                                                  |
| Final R indices [I > 2σ(I)]       | R1 = 0.0875, wR2 = 0.2141                                                                                                                              |
| R indices (all data)              | R1 = 0.1272, wR2 = 0.2548                                                                                                                              |
| Largest diff. peak and hole       | 2.118 and -4.074 e.Å <sup>-3</sup>                                                                                                                     |

## $\%V_{\text{Bur}}$ and topographical steric maps calculated using SambVca

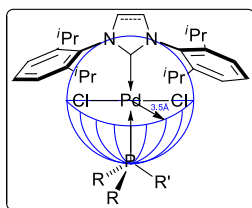

### General considerations

The buried volumes and the steric maps have been calculated on the NHC ligand as in the X-ray structure of the Pd complexes. The points in space defining the steric map were located with the SambVca package developed by Cavallo.<sup>17</sup>

To build the steric maps, the optimised geometry of the complexes under analysis has been placed with the Pd center at the origin, with the Pd-NHC or phosphine bonds aligned along the z-axis at positive z values, at a Pd-NHC/P distance of 2.1 Å. The radius *R* of the sphere around the metal centre was set to 3.5 Å, while for the atoms we adopted the Bondi radii<sup>18</sup> scaled by 1.17, and a mesh of 0.1 Å was used to scan the sphere for buried voxels.

<https://www.molnac.unisa.it/OMtools/sambvca.php>

### $\%V_{\text{Bur}}$ of IPr in the complex $[\text{PdCl}_2(\text{IPr})\{\text{PPh}_3\}]$ (2a)

Number of atoms : 29  
Atom that is coordinated : 1  
Atoms that define the axis : 2  
ID of these atoms : 28 29

Radius of sphere (Angs) : 3.500  
Distance from sphere (Angs) : 2.100  
Mesh step (Angs) : 0.050  
H atoms omitted in the  $V_{\text{bur}}$  calculation

Cartesian coordinates from input :

|                                  |                                  |                                 |
|----------------------------------|----------------------------------|---------------------------------|
| C -135.12400 -46.33000 -7.96600  | C -132.29200 -47.95600 -10.96400 | C -136.64200 -48.76000 -6.45200 |
| C -132.90800 -46.68800 -7.76900  | C -134.24100 -47.55700 -12.48700 | C -135.04200 -46.05700 -4.21600 |
| C -133.51900 -47.35200 -6.78500  | C -133.62300 -43.23700 -7.98700  | C -133.87500 -46.60400 -3.37200 |
| C -133.64900 -45.21600 -9.61500  | C -132.22700 -42.87900 -7.46000  | C -135.82600 -45.04400 -3.40200 |
| C -133.49900 -43.83700 -9.35800  | C -134.53400 -42.02400 -7.96100  | C -136.54400 -49.27800 -7.87200 |
| C -133.16800 -43.03500 -10.43600 | C -135.84000 -47.69900 -6.00900  | C -135.27000 -50.09400 -8.08500 |
| C -132.97700 -43.56000 -11.69300 | C -135.91800 -47.19200 -4.70900  | C -137.77100 -50.07000 -8.29600 |
| C -133.12000 -44.91100 -11.89100 | C -136.81200 -47.80200 -3.83900  | N -133.91500 -46.06800 -8.48900 |
| C -133.48700 -45.78300 -10.86800 | C -137.59300 -48.86100 -4.24800  | N -134.87600 -47.13500 -6.91500 |
| C -133.63600 -47.26200 -11.11600 | C -137.52700 -49.32000 -5.54100  |                                 |

Atoms and radius in the parameter file

|         |         |        |
|---------|---------|--------|
| H 1.29  | C 1.99  | N 1.81 |
| C2 1.99 | N2 1.81 | O 1.78 |
| C3 1.99 | N3 1.81 | F 1.72 |



Si 2.45 S 2.10 Br 2.16  
P 2.11 Cl 2.05

Coordinates scaled to put the metal at the origin

|   |         |          |          |   |          |          |          |    |          |          |         |
|---|---------|----------|----------|---|----------|----------|----------|----|----------|----------|---------|
| C | 1.86329 | -0.69442 | 0.67523  | C | 4.69529  | -2.32042 | -2.32277 | C  | 0.34529  | -3.12442 | 2.18923 |
| C | 4.07929 | -1.05242 | 0.87223  | C | 2.74629  | -1.92142 | -3.84577 | C  | 1.94529  | -0.42142 | 4.42523 |
| C | 3.46829 | -1.71642 | 1.85623  | C | 3.36429  | 2.39858  | 0.65423  | C  | 3.11229  | -0.96842 | 5.26923 |
| C | 3.33829 | 0.41958  | -0.97377 | C | 4.76029  | 2.75658  | 1.18123  | C  | 1.16129  | 0.59158  | 5.23923 |
| C | 3.48829 | 1.79858  | -0.71677 | C | 2.45329  | 3.61158  | 0.68023  | C  | 0.44329  | -3.64242 | 0.76923 |
| C | 3.81929 | 2.60058  | -1.79477 | C | 1.14729  | -2.06342 | 2.63223  | C  | 1.71729  | -4.45842 | 0.55623 |
| C | 4.01029 | 2.07558  | -3.05177 | C | 1.06929  | -1.55642 | 3.93223  | C  | -0.78371 | -4.43442 | 0.34523 |
| C | 3.86729 | 0.72458  | -3.24977 | C | 0.17529  | -2.16642 | 4.80223  | N  | 3.07229  | -0.43242 | 0.15223 |
| C | 3.50029 | -0.14742 | -2.22677 | C | -0.60571 | -3.22542 | 4.39323  | N  | 2.11129  | -1.49942 | 1.72623 |
| C | 3.35129 | -1.62642 | -2.47477 | C | -0.53971 | -3.68442 | 3.10023  | XX | 0.00000  | 0.00000  | 0.00000 |

Results : Volumes in Angs<sup>3</sup>

N of voxels examined : 1436277  
Volume of voxel : 0.125E-03

V Free V Buried V Total V Exact  
117.976 61.559 179.535 179.594

%V\_Free %V\_Bur % Tot/Ex  
65.712 34.288 99.967

The %V<sub>Bur</sub> of *IPr* is: **34.3**

### Steric map of *IPr* in the complex [PdCl<sub>2</sub>(*IPr*){PPh<sub>3</sub>}] (**2a**)

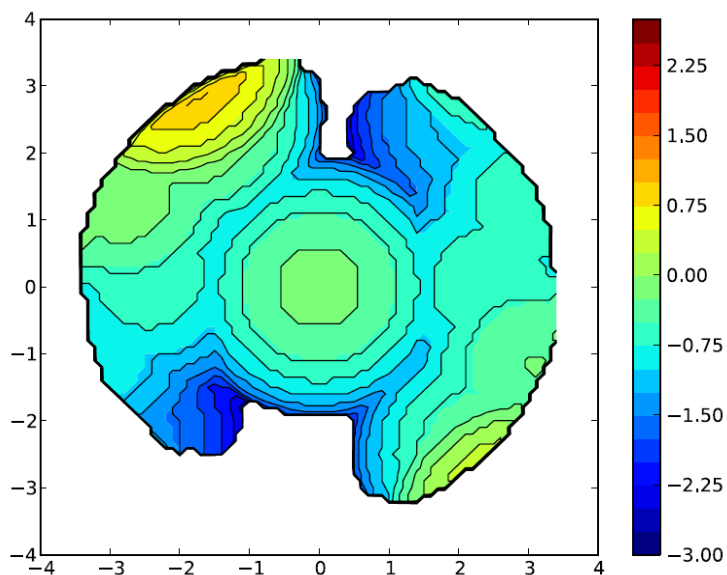

### %V<sub>Bur</sub> of PPh<sub>3</sub> in the complex [PdCl<sub>2</sub>(*IPr*){PPh<sub>3</sub>}] (**2a**)

Number of atoms : 19  
Atom that is coordinated : 19  
Atoms that define the axis : 3  
ID of these atoms : 1 7 13

Radius of sphere (Angs) : 3.500  
Distance from sphere (Angs) : 2.100  
Mesh step (Angs) : 0.050

H atoms omitted in the V<sub>Bur</sub> calculation

Cartesian coordinates from input :

|   |            |           |          |   |            |           |          |   |            |           |          |
|---|------------|-----------|----------|---|------------|-----------|----------|---|------------|-----------|----------|
| C | -133.20000 | -40.70700 | 42.97400 | C | -135.00600 | -41.65700 | 40.58900 | C | -133.95300 | -44.58700 | 46.04700 |
| C | -133.58400 | -40.15600 | 44.16900 | C | -135.99800 | -41.88200 | 39.63600 | C | -135.30400 | -44.39000 | 46.25900 |
| C | -133.41300 | -38.79700 | 44.41700 | C | -136.49300 | -43.14300 | 39.44500 | C | -136.03200 | -43.62000 | 45.39000 |
| C | -132.84100 | -38.00900 | 43.46700 | C | -136.01800 | -44.19900 | 40.18100 | C | -135.42900 | -43.04300 | 44.30900 |
| C | -132.45000 | -38.52700 | 42.27000 | C | -135.01100 | -43.97400 | 41.13300 | P | -133.26000 | -42.48000 | 42.63000 |
| C | -132.62500 | -39.88300 | 42.00500 | C | -134.06400 | -43.22100 | 44.06800 |   |            |           |          |
| C | -134.53100 | -42.69600 | 41.33700 | C | -133.34900 | -44.00700 | 44.95200 |   |            |           |          |

Atoms and radius in the parameter file

|    |      |    |      |    |      |  |
|----|------|----|------|----|------|--|
| H  | 1.29 | N3 | 1.81 | P  | 2.11 |  |
| C2 | 1.99 | N  | 1.81 | S  | 2.10 |  |
| C3 | 1.99 | O  | 1.78 | Cl | 2.05 |  |
| C  | 1.99 | F  | 1.72 | Br | 2.16 |  |
| N2 | 1.81 | Si | 2.45 |    |      |  |

Coordinates scaled to put the metal at the origin

|   |          |         |          |   |          |          |          |    |          |          |         |
|---|----------|---------|----------|---|----------|----------|----------|----|----------|----------|---------|
| C | -1.83900 | 2.54203 | 0.80485  | C | -3.64500 | 1.59203  | -1.58015 | C  | -2.59200 | -1.33797 | 3.87785 |
| C | -2.22300 | 3.09303 | 1.99985  | C | -4.63700 | 1.36703  | -2.53315 | C  | -3.94300 | -1.14097 | 4.08985 |
| C | -2.05200 | 4.45203 | 2.24785  | C | -5.13200 | 0.10603  | -2.72415 | C  | -4.67100 | -0.37097 | 3.22085 |
| C | -1.48000 | 5.24003 | 1.29785  | C | -4.65700 | -0.94997 | -1.98815 | C  | -4.06800 | 0.20603  | 2.13985 |
| C | -1.08900 | 4.72203 | 0.10085  | C | -3.65000 | -0.72497 | -1.03615 | P  | -1.89900 | 0.76903  | 0.46085 |
| C | -1.26400 | 3.36603 | -0.16415 | C | -2.70300 | 0.02803  | 1.89885  | XX | 0.00000  | 0.00000  | 0.00000 |
| C | -3.17000 | 0.55303 | -0.83215 | C | -1.98800 | -0.75797 | 2.78285  |    |          |          |         |

Results : Volumes in Angs<sup>3</sup>

N of voxels examined : 1436277  
Volume of voxel : 0.125E-03

| V Free  | V Buried | V Total | V Exact |
|---------|----------|---------|---------|
| 122.485 | 57.050   | 179.535 | 179.594 |

| %V Free | %V <sub>Bur</sub> | % Tot/Ex |
|---------|-------------------|----------|
| 68.223  | 31.777            | 99.967   |

The %V<sub>Bur</sub> of PPh<sub>3</sub> is: **31.8**

Steric map of PPh<sub>3</sub> in the complex [PdCl<sub>2</sub>(IPr){PPh<sub>3</sub>}] (2a)

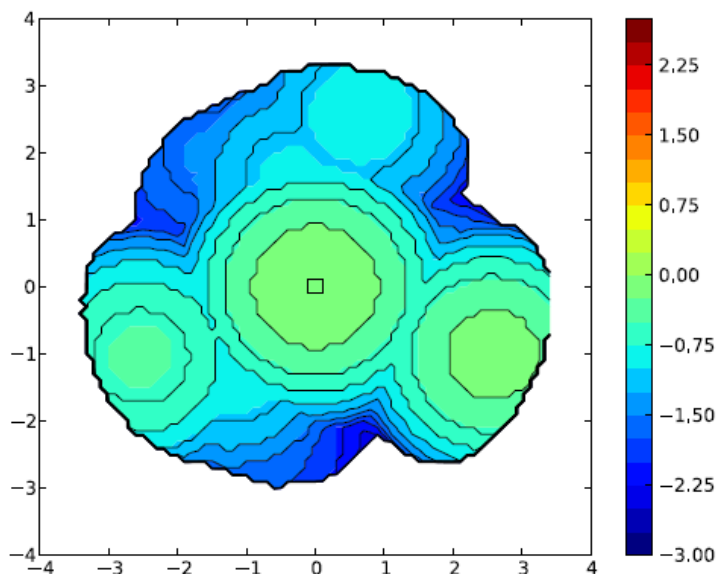

### % $V_{\text{Bur}}$ of IPr in the complex [PdCl<sub>2</sub>(IPr){PCy<sub>3</sub>}] (2b)

Number of atoms : 29  
Atom that is coordinated : 1  
Atoms that define the axis : 2  
ID of these atoms : 28 29

Radius of sphere (Angs) : 3.500  
Distance from sphere (Angs) : 2.100  
Mesh step (Angs) : 0.050  
H atoms omitted in the  $V_{\text{bur}}$  calculation

#### Cartesian coordinates from input :

|   |          |           |          |   |          |           |          |   |          |           |          |
|---|----------|-----------|----------|---|----------|-----------|----------|---|----------|-----------|----------|
| C | 28.96000 | -17.49800 | 46.43000 | C | 31.00100 | -15.87400 | 43.05600 | C | 26.20500 | -17.00300 | 48.22900 |
| C | 29.85100 | -15.42500 | 46.45400 | C | 30.95100 | -18.29800 | 42.40700 | C | 26.06900 | -16.39700 | 44.41400 |
| C | 28.53700 | -15.28000 | 46.65300 | C | 31.99900 | -17.08600 | 48.52200 | C | 25.91100 | -14.91700 | 44.10000 |
| C | 31.41100 | -17.31300 | 46.04000 | C | 32.55400 | -15.71500 | 48.86600 | C | 25.25700 | -17.23800 | 43.40900 |
| C | 31.75900 | -17.58900 | 44.71300 | C | 32.54900 | -18.11900 | 49.51900 | C | 27.20400 | -17.00400 | 49.37800 |
| C | 33.05400 | -18.05400 | 44.45800 | C | 26.57600 | -16.79200 | 46.89400 | C | 27.08400 | -15.67100 | 50.12900 |
| C | 33.96100 | -18.22500 | 45.47800 | C | 25.67400 | -16.70000 | 45.85000 | C | 26.92000 | -18.16200 | 50.34200 |
| C | 33.60700 | -17.93400 | 46.76500 | C | 24.31700 | -16.82600 | 46.17100 | N | 30.11000 | -16.77800 | 46.30500 |
| C | 32.34400 | -17.46300 | 47.08700 | C | 23.91300 | -17.04400 | 47.47500 | N | 27.99400 | -16.55700 | 46.63100 |
| C | 30.79100 | -17.29600 | 43.56100 | C | 24.85400 | -17.12000 | 48.49100 |   |          |           |          |

#### Atoms and radius in the parameter file

|    |      |    |      |    |      |
|----|------|----|------|----|------|
| H  | 1.29 | N3 | 1.81 | P  | 2.11 |
| C2 | 1.99 | N  | 1.81 | S  | 2.10 |
| C3 | 1.99 | O  | 1.78 | Cl | 2.05 |
| C  | 1.99 | F  | 1.72 | Br | 2.16 |
| N2 | 1.81 | Si | 2.45 |    |      |

#### Coordinates scaled to put the metal at the origin

|   |          |         |          |   |          |         |          |    |          |         |          |
|---|----------|---------|----------|---|----------|---------|----------|----|----------|---------|----------|
| C | 0.23098  | 2.08508 | 0.09540  | C | 2.27198  | 3.70908 | -3.27860 | C  | -2.52402 | 2.58008 | 1.89440  |
| C | 1.12198  | 4.15808 | 0.11940  | C | 2.22198  | 1.28508 | -3.92760 | C  | -2.66002 | 3.18608 | -1.92060 |
| C | -0.19202 | 4.30308 | 0.31840  | C | 3.26998  | 2.49708 | 2.18740  | C  | -2.81802 | 4.66608 | -2.23460 |
| C | 2.68198  | 2.27008 | -0.29460 | C | 3.82498  | 3.86808 | 2.53140  | C  | -3.47202 | 2.34508 | -2.92560 |
| C | 3.02998  | 1.99408 | -1.62160 | C | 3.81998  | 1.46408 | 3.18440  | C  | -1.52502 | 2.57908 | 3.04340  |
| C | 4.32498  | 1.52908 | -1.87660 | C | -2.15302 | 2.79108 | 0.55940  | C  | -1.64502 | 3.91208 | 3.79440  |
| C | 5.23198  | 1.35808 | -0.85660 | C | -3.05502 | 2.88308 | -0.48460 | C  | -1.80902 | 1.42108 | 4.00740  |
| C | 4.87798  | 1.64908 | 0.43040  | C | -4.41202 | 2.75708 | -0.16360 | N  | 1.38098  | 2.80508 | -0.02960 |
| C | 3.61498  | 2.12008 | 0.75240  | C | -4.81602 | 2.53908 | 1.14040  | N  | -0.73502 | 3.02608 | 0.29640  |
| C | 2.06198  | 2.28708 | -2.77360 | C | -3.87502 | 2.46308 | 2.15640  | XX | 0.00000  | 0.00000 | 0.00000  |

Results : Volumes in Angs<sup>3</sup>

N of voxels examined : 1436277  
Volume of voxel : 0.125E-03

V Free V Buried V Total V Exact  
121.820 57.715 179.535 179.594

%V Free %V\_Bur % Tot/Ex  
67.853 32.147 99.967

The % $V_{\text{Bur}}$  of IPr is: **32.1**

## Steric map of IPr in the complex $[\text{PdCl}_2(\text{IPr})\{\text{PCy}_3\}]$ (2b)

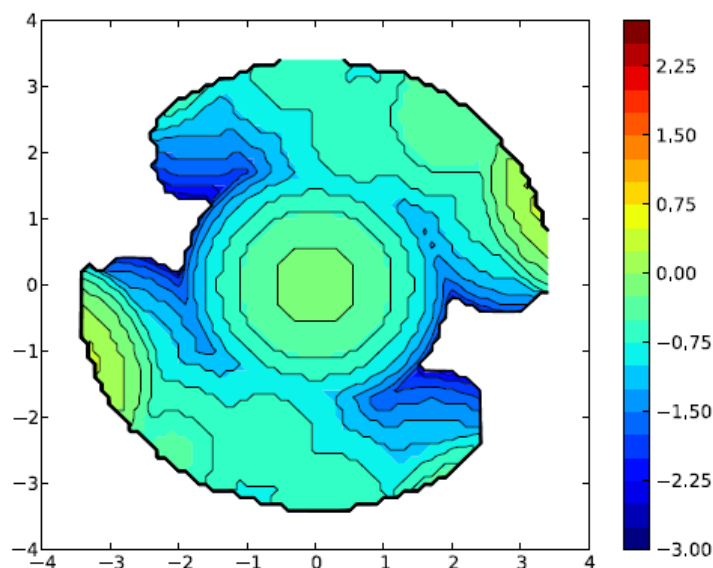

## %V<sub>Bur</sub> of PCy<sub>3</sub> in the complex $[\text{PdCl}_2(\text{IPr})\{\text{PCy}_3\}]$ (2b)

Number of atoms : 19  
Atom that is coordinated : 3  
Atoms that define the axis : 3  
ID of these atoms : 1 7 13

Radius of sphere (Angs) : 3.500  
Distance from sphere (Angs) : 2.100  
Mesh step (Angs) : 0.050  
H atoms omitted in the V<sub>bur</sub> calculation

### Cartesian coordinates from input :

|   |          |           |          |   |          |           |          |   |          |           |          |
|---|----------|-----------|----------|---|----------|-----------|----------|---|----------|-----------|----------|
| C | 28.99900 | -22.82600 | 47.52400 | C | 28.10200 | -23.96200 | 44.33900 | C | 24.00000 | -21.59700 | 45.81000 |
| C | 28.44700 | -24.23500 | 47.77100 | C | 28.11500 | -24.29000 | 42.84000 | C | 23.66900 | -20.88400 | 47.12600 |
| C | 29.14800 | -24.89500 | 48.97300 | C | 29.46500 | -23.93700 | 42.19900 | C | 24.53400 | -21.40300 | 48.23600 |
| C | 30.64400 | -24.92300 | 48.78800 | C | 29.86200 | -22.50000 | 42.48500 | C | 26.01100 | -21.28200 | 47.89500 |
| C | 31.21100 | -23.52200 | 48.53800 | C | 29.84600 | -22.19100 | 43.97600 | P | 28.17700 | -21.78800 | 46.23800 |
| C | 30.52300 | -22.87900 | 47.33100 | C | 26.35800 | -21.98600 | 46.57600 |   |          |           |          |
| C | 28.43600 | -22.47400 | 44.55400 | C | 25.46800 | -21.45700 | 45.44800 |   |          |           |          |

### Atoms and radius in the parameter file

|    |      |    |      |    |      |  |  |
|----|------|----|------|----|------|--|--|
| H  | 1.29 | N3 | 1.81 | P  | 2.11 |  |  |
| C2 | 1.99 | N  | 1.81 | S  | 2.10 |  |  |
| C3 | 1.99 | O  | 1.78 | Cl | 2.05 |  |  |
| C  | 1.99 | F  | 1.72 | Br | 2.16 |  |  |
| N2 | 1.81 | Si | 2.45 |    |      |  |  |

### Coordinates scaled to put the metal at the origin

|   |          |          |          |   |          |          |          |    |          |          |          |
|---|----------|----------|----------|---|----------|----------|----------|----|----------|----------|----------|
| C | 0.06956  | -2.99761 | 1.22483  | C | -0.82744 | -4.13361 | -1.96017 | C  | -4.92944 | -1.76861 | -0.48917 |
| C | -0.48244 | -4.40661 | 1.47183  | C | -0.81444 | -4.46161 | -3.45917 | C  | -5.26044 | -1.05561 | 0.82683  |
| C | 0.21856  | -5.06661 | 2.67383  | C | 0.53556  | -4.10861 | -4.10017 | C  | -4.39544 | -1.57461 | 1.93683  |
| C | 1.71456  | -5.09461 | 2.48883  | C | 0.93256  | -2.67161 | -3.81417 | C  | -2.91844 | -1.45361 | 1.59583  |
| C | 2.28156  | -3.69361 | 2.23883  | C | 0.91656  | -2.36261 | -2.32317 | P  | -0.75244 | -1.95961 | -0.06117 |
| C | 1.59356  | -3.05061 | 1.03183  | C | -2.57144 | -2.15761 | 0.27683  | XX | 0.00000  | 0.00000  | 0.00000  |
| C | -0.49344 | -2.64561 | -1.74517 | C | -3.46144 | -1.62861 | -0.85117 |    |          |          |          |

Results : Volumes in Angs<sup>3</sup>

N of voxels examined : 1436277  
Volume of voxel : 0.125E-03

| V Free  | V Buried | V Total | V Exact |
|---------|----------|---------|---------|
| 116.367 | 63.168   | 179.535 | 179.594 |

| %V_Free | %V_Bur | % Tot/Ex |
|---------|--------|----------|
| 64.816  | 35.184 | 99.967   |

The %V<sub>Bur</sub> of PCy<sub>3</sub> is: **35.2**

### Steric map of PCy<sub>3</sub> in the complex [PdCl<sub>2</sub>(IPr){PCy<sub>3</sub>}] (2b)

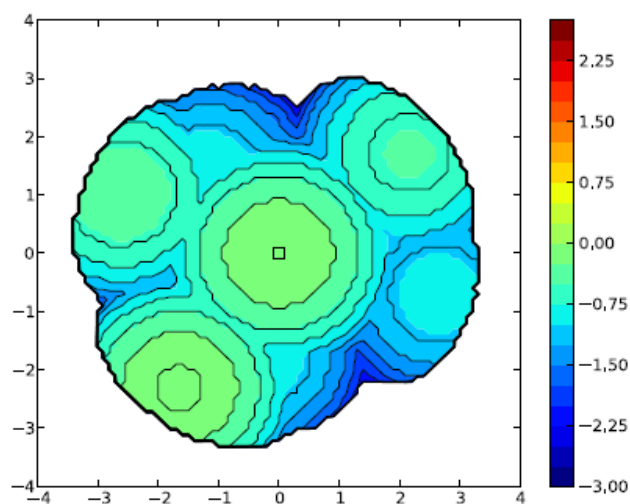

### %V<sub>Bur</sub> of IPr in the complex [PdCl<sub>2</sub>(IPr){P(*o*-tolyl)<sub>3</sub>}] (2c)

Number of atoms : 29  
Atom that is coordinated : 1  
Atoms that define the axis : 2  
ID of these atoms : 28 29

Radius of sphere (Angs) : 3.500  
Distance from sphere (Angs) : 2.100  
Mesh step (Angs) : 0.050  
H atoms omitted in the V<sub>bur</sub> calculation

#### Cartesian coordinates from input :

|   |         |          |          |   |          |          |          |   |         |          |          |
|---|---------|----------|----------|---|----------|----------|----------|---|---------|----------|----------|
| C | 4.86400 | 93.57400 | -1.31700 | C | 6.23900  | 94.88500 | 2.29100  | C | 1.62900 | 93.70800 | -0.37000 |
| C | 5.35100 | 95.76900 | -1.05600 | C | 6.82900  | 92.54300 | 2.62900  | C | 2.74200 | 93.76500 | -4.05700 |
| C | 4.03300 | 95.67800 | -1.23800 | C | 7.86200  | 94.82500 | -3.21100 | C | 2.39800 | 95.16900 | -4.58400 |
| C | 7.25200 | 94.18800 | -0.81300 | C | 8.14900  | 96.36800 | -3.36300 | C | 2.55400 | 92.72800 | -5.16500 |
| C | 7.59200 | 93.78100 | 0.48900  | C | 8.61700  | 94.05000 | -4.25400 | C | 2.11300 | 94.18300 | 0.97700  |
| C | 8.92900 | 93.58800 | 0.75100  | C | 2.39200  | 93.80600 | -1.53900 | C | 1.52100 | 95.56000 | 1.29900  |
| C | 9.86200 | 93.78100 | -0.17100 | C | 1.91600  | 93.47800 | -2.79400 | C | 1.76700 | 93.20200 | 2.14100  |
| C | 9.54900 | 94.22600 | -1.45000 | C | 0.61400  | 92.95700 | -2.87800 | N | 5.86000 | 94.47800 | -1.08900 |
| C | 8.20300 | 94.39300 | -1.79500 | C | -0.13100 | 92.81000 | -1.73500 | N | 3.73500 | 94.32100 | -1.40400 |
| C | 6.55200 | 93.59800 | 1.59000  | C | 0.32500  | 93.19900 | -0.50500 |   |         |          |          |

#### Atoms and radius in the parameter file

|    |      |    |      |    |      |
|----|------|----|------|----|------|
| H  | 1.29 | N3 | 1.81 | P  | 2.11 |
| C2 | 1.99 | N  | 1.81 | S  | 2.10 |
| C3 | 1.99 | O  | 1.78 | Cl | 2.05 |
| C  | 1.99 | F  | 1.72 | Br | 2.16 |
| N2 | 1.81 | Si | 2.45 |    |      |

#### Coordinates scaled to put the metal at the origin

|   |          |         |          |   |          |         |          |    |          |         |          |
|---|----------|---------|----------|---|----------|---------|----------|----|----------|---------|----------|
| C | -0.16802 | 2.08568 | 0.17812  | C | 1.20698  | 3.39668 | 3.78612  | C  | -3.40302 | 2.21968 | 1.12512  |
| C | 0.31898  | 4.28068 | 0.43912  | C | 1.79698  | 1.05468 | 4.12412  | C  | -2.29002 | 2.27668 | -2.56188 |
| C | -0.99902 | 4.18968 | 0.25712  | C | 2.82998  | 3.33668 | -1.71588 | C  | -2.63402 | 3.68068 | -3.08888 |
| C | 2.21998  | 2.69968 | 0.68212  | C | 3.11698  | 4.87968 | -1.86788 | C  | -2.47802 | 1.23968 | -3.66988 |
| C | 2.55998  | 2.29268 | 1.98412  | C | 3.58498  | 2.56168 | -2.75888 | C  | -2.91902 | 2.69468 | 2.47212  |
| C | 3.89698  | 2.09968 | 2.24612  | C | -2.64002 | 2.31768 | -0.04388 | C  | -3.51102 | 4.07168 | 2.79412  |
| C | 4.82998  | 2.29268 | 1.32412  | C | -3.11602 | 1.98968 | -1.29888 | C  | -3.26502 | 1.71368 | 3.63612  |
| C | 4.51698  | 2.73768 | 0.04512  | C | -4.41802 | 1.46868 | -1.38288 | N  | 0.82798  | 2.98968 | 0.40612  |
| C | 3.17098  | 2.90468 | -0.29988 | C | -5.16302 | 1.32168 | -0.23988 | N  | -1.29702 | 2.83268 | 0.09112  |
| C | 1.51998  | 2.10968 | 3.08512  | C | -4.70702 | 1.71068 | 0.99012  | XX | 0.00000  | 0.00000 | 0.00000  |

#### Results : Volumes in Angs<sup>3</sup>

N of voxels examined : 1436277  
Volume of voxel : 0.125E-03

V Free V Buried V Total V Exact  
120.563 58.972 179.535 179.594

%V<sub>Free</sub> %V<sub>Bur</sub> % Tot/Ex  
67.153 32.847 99.967

The %V<sub>Bur</sub> of your IPr is: **32.8**

### Steric map of IPr in the complex [PdCl<sub>2</sub>(IPr){P(*o*-tolyl)<sub>3</sub>}] (2c)

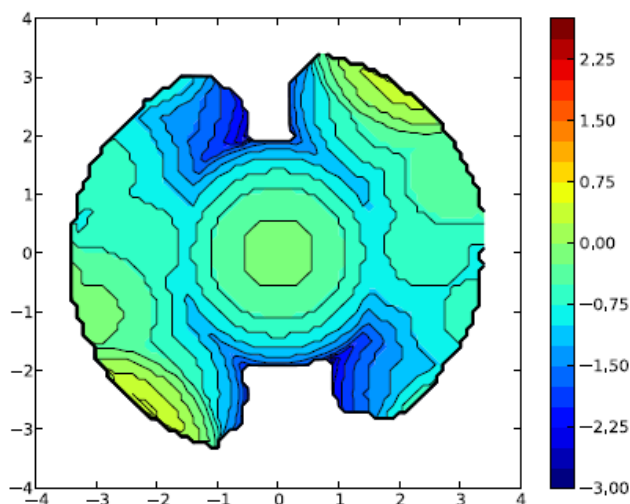

### % $V_{\text{Bur}}$ of $\text{P}(o\text{-tolyl})_3$ in the complex $[\text{PdCl}_2(\text{IPr})\{\text{P}(o\text{-tolyl})_3\}]$ (2c)

Number of atoms : 22  
Atom that is coordinated : 22  
Atoms that define the axis : 3  
ID of these atoms : 1 8 15

Radius of sphere (Angs) : 3.500  
Distance from sphere (Angs) : 2.100  
Mesh step (Angs) : 0.050  
H atoms omitted in the  $V_{\text{bur}}$  calculation

#### Cartesian coordinates from input :

|   |         |          |          |   |          |          |          |   |         |          |          |
|---|---------|----------|----------|---|----------|----------|----------|---|---------|----------|----------|
| C | 5.09900 | 88.10900 | -0.56700 | C | 7.98400  | 87.70000 | -2.11400 | C | 2.85800 | 88.51500 | -4.82000 |
| C | 5.72100 | 88.15900 | 0.70500  | C | 9.38300  | 87.61700 | -2.14200 | C | 3.58700 | 87.92700 | -5.78400 |
| C | 5.30900 | 87.24600 | 1.67300  | C | 10.19500 | 88.76100 | -2.13700 | C | 4.93700 | 87.71400 | -5.57800 |
| C | 4.33600 | 86.27400 | 1.39700  | C | 9.60600  | 89.98000 | -2.14700 | C | 5.52600 | 88.13900 | -4.40600 |
| C | 3.73300 | 86.22600 | 0.15400  | C | 8.21100  | 90.10900 | -2.08900 | C | 2.52600 | 89.58900 | -2.55100 |
| C | 4.10700 | 87.13300 | -0.81400 | C | 7.19700  | 86.40200 | -2.05000 | P | 5.59000 | 89.28700 | -1.86700 |
| C | 6.83100 | 89.13400 | 1.04100  | C | 4.76900  | 88.71300 | -3.39600 |   |         |          |          |
| C | 7.37900 | 88.96200 | -2.07300 | C | 3.39900  | 88.93600 | -3.58200 |   |         |          |          |

#### Atoms and radius in the parameter file

|    |      |    |      |    |      |
|----|------|----|------|----|------|
| H  | 1.29 | N3 | 1.81 | P  | 2.11 |
| C2 | 1.99 | N  | 1.81 | S  | 2.10 |
| C3 | 1.99 | O  | 1.78 | Cl | 2.05 |
| C  | 1.99 | F  | 1.72 | Br | 2.16 |
| N2 | 1.81 | Si | 2.45 |    |      |

#### Coordinates scaled to put the metal at the origin

|   |          |          |          |   |          |          |          |    |          |          |          |
|---|----------|----------|----------|---|----------|----------|----------|----|----------|----------|----------|
| C | -0.03045 | -3.18337 | 0.88000  | C | 2.85455  | -3.59237 | -0.66700 | C  | -2.27145 | -2.77737 | -3.37300 |
| C | 0.59155  | -3.13337 | 2.15200  | C | 4.25355  | -3.67537 | -0.69500 | C  | -1.54245 | -3.36537 | -4.33700 |
| C | 0.17955  | -4.04637 | 3.12000  | C | 5.06555  | -2.53137 | -0.69000 | C  | -0.19245 | -3.57837 | -4.13100 |
| C | -0.79345 | -5.01837 | 2.84400  | C | 4.47655  | -1.31237 | -0.70000 | C  | 0.39655  | -3.15337 | -2.95900 |
| C | -1.39645 | -5.06637 | 1.60100  | C | 3.08155  | -1.18337 | -0.64200 | C  | -2.60345 | -1.70337 | -1.10400 |
| C | -1.02245 | -4.15937 | 0.63300  | C | 2.06755  | -4.89037 | -0.60300 | P  | 0.46055  | -2.00537 | -0.42000 |
| C | 1.70155  | -2.15837 | 2.48800  | C | -0.36045 | -2.57937 | -1.94900 | XX | 0.00000  | 0.00000  | 0.00000  |
| C | 2.24955  | -2.33037 | -0.62600 | C | -1.73045 | -2.35637 | -2.13500 |    |          |          |          |

Results : Volumes in Angs<sup>3</sup>

N of voxels examined : 1436277

Volume of voxel : 0.125E-03

| V Free  | V Buried | V Total | V Exact |
|---------|----------|---------|---------|
| 109.594 | 69.941   | 179.535 | 179.594 |

| %V_Free | %V_Bur | % Tot/Ex |
|---------|--------|----------|
| 61.043  | 38.957 | 99.967   |

The %V\_Bur of *P(o-tolyl)*<sub>3</sub> is: **39.0**

### Steric map of *P(o-tolyl)*<sub>3</sub> in the complex [PdCl<sub>2</sub>(IPr){*P(o-tolyl)*<sub>3</sub>}] (2c)

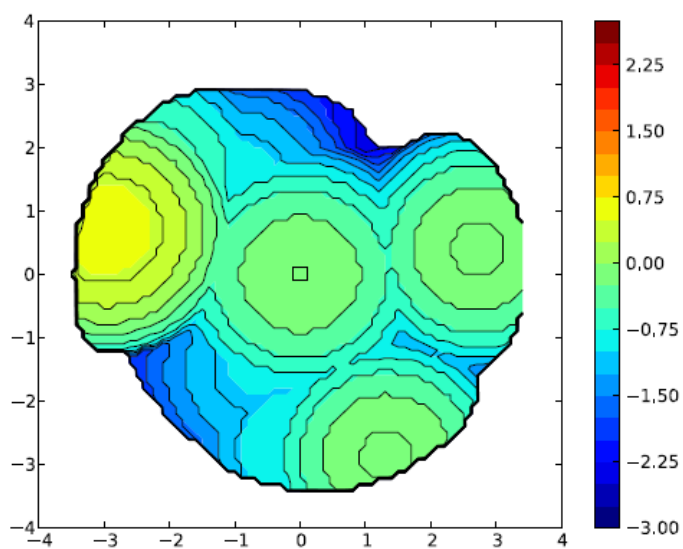



## %V<sub>Bur</sub> of IPr in the complex [PdCl<sub>2</sub>(IPr){P(1-Ad)<sub>2</sub>(<sup>n</sup>Bu)}] (2d)

Number of atoms : 29  
Atom that is coordinated : 1  
Atoms that define the axis : 2  
ID of these atoms : 28 29

Radius of sphere (Angs) : 3.500  
Distance from sphere (Angs) : 2.100  
Mesh step (Angs) : 0.050  
H atoms omitted in the V<sub>bur</sub> calculation

### Cartesian coordinates from input :

|   |          |           |           |   |          |           |           |   |          |           |           |
|---|----------|-----------|-----------|---|----------|-----------|-----------|---|----------|-----------|-----------|
| C | 33.64000 | -52.00100 | -22.72600 | C | 30.86400 | -54.34700 | -19.69200 | C | 36.83500 | -50.82400 | -23.05600 |
| C | 32.63400 | -50.32500 | -21.62800 | C | 30.27000 | -51.90800 | -19.45900 | C | 35.56000 | -52.83600 | -20.05400 |
| C | 33.95900 | -50.14400 | -21.47500 | C | 31.27400 | -50.80300 | -24.94500 | C | 35.90100 | -54.30800 | -19.64200 |
| C | 31.20100 | -52.05200 | -22.71900 | C | 30.83400 | -49.40000 | -24.52500 | C | 35.64200 | -51.93500 | -18.83800 |
| C | 30.57800 | -52.81800 | -21.76900 | C | 30.97500 | -51.04900 | -26.42600 | C | 36.36500 | -49.73400 | -24.01300 |
| C | 29.38700 | -53.52100 | -22.17400 | C | 35.99800 | -51.45400 | -22.13000 | C | 36.51400 | -48.35500 | -23.36600 |
| C | 28.90700 | -53.40200 | -23.44500 | C | 36.48200 | -52.33900 | -21.16500 | C | 37.05000 | -49.73200 | -25.36700 |
| C | 29.53000 | -52.52600 | -24.34100 | C | 37.83600 | -52.65200 | -21.17600 | N | 32.46200 | -51.46600 | -22.38600 |
| C | 30.66000 | -51.84200 | -24.01300 | C | 38.67600 | -52.10600 | -22.13500 | N | 34.60100 | -51.18000 | -22.17600 |
| C | 31.03500 | -52.93200 | -20.32800 | C | 38.18200 | -51.16900 | -23.05400 |   |          |           |           |

### Atoms and radius in the parameter file

|    |      |    |      |    |      |
|----|------|----|------|----|------|
| H  | 1.29 | N3 | 1.81 | P  | 2.11 |
| C2 | 1.99 | N  | 1.81 | S  | 2.10 |
| C3 | 1.99 | O  | 1.78 | Cl | 2.05 |
| C  | 1.99 | F  | 1.72 | Br | 2.16 |
| N2 | 1.81 | Si | 2.45 |    |      |

### Coordinates scaled to put the metal at the origin

|   |          |         |          |   |          |          |          |    |          |          |          |
|---|----------|---------|----------|---|----------|----------|----------|----|----------|----------|----------|
| C | -0.27847 | 1.74012 | 1.14212  | C | -3.05447 | -0.60588 | 4.17612  | C  | 2.91653  | 2.91712  | 0.81212  |
| C | -1.28447 | 3.41612 | 2.24012  | C | -3.64847 | 1.83312  | 4.40912  | C  | 1.64153  | 0.90512  | 3.81412  |
| C | 0.04053  | 3.59712 | 2.39312  | C | -2.64447 | 2.93812  | -1.07688 | C  | 1.98253  | -0.56688 | 4.22612  |
| C | -2.71747 | 1.68912 | 1.14912  | C | -3.08447 | 4.34112  | -0.65688 | C  | 1.72353  | 1.80612  | 5.03012  |
| C | -3.34047 | 0.92312 | 2.09912  | C | -2.94347 | 2.69212  | -2.55788 | C  | 2.44653  | 4.00712  | -0.14488 |
| C | -4.53147 | 0.22012 | 1.69412  | C | 2.07953  | 2.28712  | 1.73812  | C  | 2.59553  | 5.38612  | 0.50212  |
| C | -5.01147 | 0.33912 | 0.42312  | C | 2.56353  | 1.40212  | 2.70312  | C  | 3.13153  | 4.00912  | -1.49888 |
| C | -4.38847 | 1.21512 | -0.47288 | C | 3.91753  | 1.08912  | 2.69212  | N  | -1.45647 | 2.27512  | 1.48212  |
| C | -3.25847 | 1.89912 | -0.14488 | C | 4.75753  | 1.63512  | 1.73312  | N  | 0.68253  | 2.56112  | 1.69212  |
| C | -2.88347 | 0.80912 | 3.54012  | C | 4.26353  | 2.57212  | 0.81412  | XX | 0.00000  | 0.00000  | 0.00000  |

### Results : Volumes in Angs<sup>3</sup>

N of voxels examined : 1436277  
Volume of voxel : 0.125E-03

| V Free  | V Buried | V Total | V Exact |
|---------|----------|---------|---------|
| 119.878 | 59.657   | 179.535 | 179.594 |

| %V <sub>Free</sub> | %V <sub>Bur</sub> | % Tot/Ex |
|--------------------|-------------------|----------|
| 66.771             | 33.229            | 99.967   |

The %V<sub>Bur</sub> of your IPr is: **33.2**

### Steric map of IPr in the complex $[\text{PdCl}_2(\text{IPr})\{\text{P}(\text{1-Ad})_2(\text{Bu})\}]$ (2d)

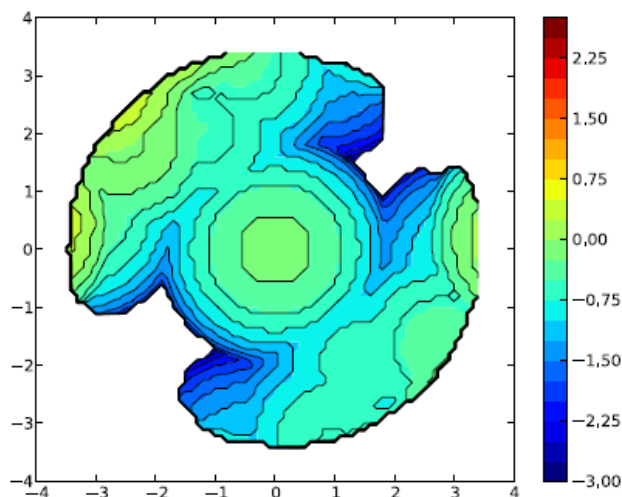

### % $V_{\text{Bur}}$ of $\text{P}(\text{1-Ad})_2(\text{Bu})$ in the complex $[\text{PdCl}_2(\text{IPr})\{\text{P}(\text{1-Ad})_2(\text{Bu})\}]$ (2d)

Number of atoms : 25  
Atom that is coordinated : 25  
Atoms that define the axis : 3  
ID of these atoms : 1 11 21

Radius of sphere (Angs) : 3.500  
Distance from sphere (Angs) : 2.100  
Mesh step (Angs) : 0.050  
H atoms omitted in the  $V_{\text{bur}}$  calculation

#### Cartesian coordinates from input :

|   |          |           |           |   |          |           |           |   |          |           |           |
|---|----------|-----------|-----------|---|----------|-----------|-----------|---|----------|-----------|-----------|
| C | 36.16200 | -55.33200 | -26.23800 | C | 39.10000 | -55.72700 | -26.47700 | C | 31.03000 | -57.92400 | -27.06900 |
| C | 35.92800 | -54.59900 | -27.57900 | C | 33.11800 | -56.01700 | -26.25200 | C | 31.98700 | -56.50400 | -25.29000 |
| C | 37.23500 | -54.43600 | -28.33700 | C | 33.38900 | -57.13400 | -27.25600 | C | 34.87300 | -57.00500 | -24.17500 |
| C | 37.86000 | -55.84600 | -28.63800 | C | 32.10200 | -57.44600 | -28.03200 | C | 36.03000 | -56.90900 | -23.14200 |
| C | 38.09600 | -56.53700 | -27.34200 | C | 31.58700 | -56.22400 | -28.77000 | C | 35.90900 | -58.02100 | -22.07600 |
| C | 36.80800 | -56.69400 | -26.56300 | C | 31.22800 | -55.16100 | -27.75800 | C | 37.03900 | -58.02800 | -21.07800 |
| C | 37.16400 | -54.51300 | -25.42500 | C | 32.52600 | -54.78900 | -26.97900 | P | 34.59000 | -55.51000 | -25.21100 |
| C | 38.48800 | -54.34600 | -26.18800 | C | 30.22200 | -55.59900 | -26.80800 |   |          |           |           |
| C | 38.23400 | -53.64000 | -27.48700 | C | 30.69900 | -56.81900 | -26.06600 |   |          |           |           |

#### Atoms and radius in the parameter file

|    |      |    |      |    |      |  |
|----|------|----|------|----|------|--|
| H  | 1.29 | N3 | 1.81 | P  | 2.11 |  |
| C2 | 1.99 | N  | 1.81 | S  | 2.10 |  |
| C3 | 1.99 | O  | 1.78 | Cl | 2.05 |  |
| C  | 1.99 | F  | 1.72 | Br | 2.16 |  |
| N2 | 1.81 | Si | 2.45 |    |      |  |

#### Coordinates scaled to put the metal at the origin

|   |         |          |          |   |          |          |          |   |          |          |          |
|---|---------|----------|----------|---|----------|----------|----------|---|----------|----------|----------|
| C | 1.94953 | -1.61996 | -2.04426 | C | 4.02153  | 0.07204  | -3.29326 | C | -3.99047 | -1.88696 | -2.61426 |
| C | 1.71553 | -0.88696 | -3.38526 | C | 4.88753  | -2.01496 | -2.28326 | C | -3.51347 | -3.10696 | -1.87226 |
| C | 3.02253 | -0.72396 | -4.14326 | C | -1.09447 | -2.30496 | -2.05826 | C | -3.18247 | -4.21196 | -2.87526 |
| C | 3.64753 | -2.13396 | -4.44426 | C | -0.82347 | -3.42196 | -3.06226 | C | -2.22547 | -2.79196 | -1.09626 |
| C | 3.88353 | -2.82496 | -3.14826 | C | -2.11047 | -3.73396 | -3.83826 | C | 0.66053  | -3.29296 | 0.01874  |
| C | 2.59553 | -2.98196 | -2.36926 | C | -2.62547 | -2.51196 | -4.57626 | C | 1.81753  | -3.19696 | 1.05174  |
| C | 2.95153 | -0.80096 | -1.23126 | C | -2.98447 | -1.44896 | -3.56426 | C | 1.69653  | -4.30896 | 2.11774  |
| C | 4.27553 | -0.63396 | -1.99426 | C | -1.68647 | -1.07696 | -2.78526 | C | 2.82653  | -4.31596 | 3.11574  |

P 0.37753 -1.79796 -1.01726 XX 0.00000 0.00000 0.00000

Results : Volumes in Angs<sup>3</sup>

N of voxels examined : 1436277  
Volume of voxel : 0.125E-03

| V Free  | V Buried | V Total | V Exact |
|---------|----------|---------|---------|
| 112.694 | 66.841   | 179.535 | 179.594 |

| %V_Free | %V_Bur | % Tot/Ex |
|---------|--------|----------|
| 62.770  | 37.230 | 99.967   |

The %V<sub>Bur</sub> of P(1-Ad)<sub>2</sub>(<sup>n</sup>Bu) is: **37.2**

**Steric map of P(1-Ad)<sub>2</sub>(<sup>n</sup>Bu) in the complex [PdCl<sub>2</sub>(IPr){P(1-Ad)<sub>2</sub>(<sup>n</sup>Bu)}] (2d)**

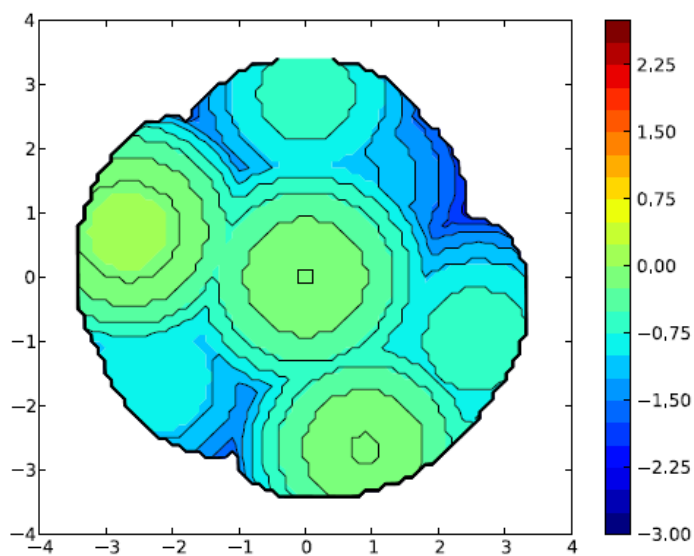

## % $V_{\text{Bur}}$ of IPr in the complex [PdCl<sub>2</sub>(IPr){PCy<sub>2</sub>(*o*-biphenyl)}] (2e)

Number of atoms : 29  
Atom that is coordinated : 1  
Atoms that define the axis : 2  
ID of these atoms : 28 29

Radius of sphere (Angs) : 3.500  
Distance from sphere (Angs) : 2.100  
Mesh step (Angs) : 0.050  
H atoms omitted in the  $V_{\text{bur}}$  calculation

### Cartesian coordinates from input :

|   |           |           |          |   |           |           |          |   |           |           |          |
|---|-----------|-----------|----------|---|-----------|-----------|----------|---|-----------|-----------|----------|
| C | -39.80152 | -49.83545 | 74.11914 | C | -35.99912 | -47.00196 | 72.90656 | C | -42.46197 | -50.37678 | 72.16213 |
| C | -39.48735 | -47.60674 | 74.14079 | C | -35.45581 | -49.32563 | 72.15288 | C | -42.77617 | -49.21929 | 75.80434 |
| C | -40.69742 | -47.83274 | 73.63158 | C | -39.00773 | -49.28685 | 77.31137 | C | -43.52409 | -47.88385 | 75.81817 |
| C | -37.67944 | -49.03971 | 75.13805 | C | -39.29553 | -47.84393 | 77.74631 | C | -43.14937 | -50.02185 | 77.03665 |
| C | -36.48215 | -48.92130 | 74.43201 | C | -39.01454 | -50.20342 | 78.54939 | C | -41.58137 | -50.17034 | 70.95295 |
| C | -35.31306 | -49.16516 | 75.13802 | C | -42.16214 | -49.86871 | 73.41856 | C | -42.16124 | -49.02454 | 70.10977 |
| C | -35.32333 | -49.49326 | 76.45969 | C | -43.03696 | -49.93626 | 74.50047 | C | -41.40327 | -51.42461 | 70.12345 |
| C | -36.51945 | -49.56887 | 77.14661 | C | -44.22182 | -50.63299 | 74.30505 | N | -38.93789 | -48.83934 | 74.45015 |
| C | -37.72186 | -49.32829 | 76.51093 | C | -44.52666 | -51.19836 | 73.10535 | N | -40.88726 | -49.20694 | 73.64140 |
| C | -36.41723 | -48.48219 | 72.98848 | C | -43.66885 | -51.06478 | 72.03018 |   |           |           |          |

### Atoms and radius in the parameter file

|    |      |    |      |    |      |
|----|------|----|------|----|------|
| H  | 1.29 | N3 | 1.81 | P  | 2.11 |
| C2 | 1.99 | N  | 1.81 | S  | 2.10 |
| C3 | 1.99 | O  | 1.78 | Cl | 2.05 |
| C  | 1.99 | F  | 1.72 | Br | 2.16 |
| N2 | 1.81 | Si | 2.45 | I  | 2.31 |

### Coordinates scaled to put the metal at the origin

|   |          |         |          |   |          |         |          |    |          |         |          |
|---|----------|---------|----------|---|----------|---------|----------|----|----------|---------|----------|
| C | -0.28332 | 2.07236 | -0.18717 | C | 3.51908  | 4.90585 | -1.39975 | C  | -2.94377 | 1.53103 | -2.14418 |
| C | 0.03085  | 4.30107 | -0.16552 | C | 4.06239  | 2.58218 | -2.15343 | C  | -3.25797 | 2.68852 | 1.49803  |
| C | -1.17922 | 4.07507 | -0.67473 | C | 0.51047  | 2.62096 | 3.00506  | C  | -4.00589 | 4.02396 | 1.51186  |
| C | 1.83876  | 2.86810 | 0.83174  | C | 0.22267  | 4.06388 | 3.44000  | C  | -3.63117 | 1.88596 | 2.73034  |
| C | 3.03605  | 2.98651 | 0.12570  | C | 0.50366  | 1.70439 | 4.24308  | C  | -2.06317 | 1.73747 | -3.35336 |
| C | 4.20514  | 2.74265 | 0.83171  | C | -2.64394 | 2.03910 | -0.88775 | C  | -2.64304 | 2.88327 | -4.19654 |
| C | 4.19487  | 2.41455 | 2.15338  | C | -3.51876 | 1.97155 | 0.19416  | C  | -1.88507 | 0.48320 | -4.18286 |
| C | 2.99875  | 2.33894 | 2.84030  | C | -4.70362 | 1.27482 | -0.00126 | N  | 0.58031  | 3.06847 | 0.14384  |
| C | 1.79634  | 2.57952 | 2.20462  | C | -5.00846 | 0.70945 | -1.20096 | N  | -1.36906 | 2.70087 | -0.66491 |
| C | 3.10097  | 3.42562 | -1.31783 | C | -4.15065 | 0.84303 | -2.27613 | XX | 0.00000  | 0.00000 | 0.00000  |

### Results : Volumes in Angs<sup>3</sup>

N of voxels examined : 1436277  
Volume of voxel : 0.125E-03

|         |          |         |         |
|---------|----------|---------|---------|
| V Free  | V Buried | V Total | V Exact |
| 119.051 | 60.484   | 179.535 | 179.594 |

|                    |                   |          |
|--------------------|-------------------|----------|
| %V <sub>Free</sub> | %V <sub>Bur</sub> | % Tot/Ex |
| 66.311             | 33.689            | 99.967   |

The % $V_{\text{Bur}}$  of IPr is: **33.7**

### Steric map of IPr in the complex $[\text{PdCl}_2(\text{IPr})\{\text{PCy}_2(o\text{-biphenyl})\}]$ (2e)

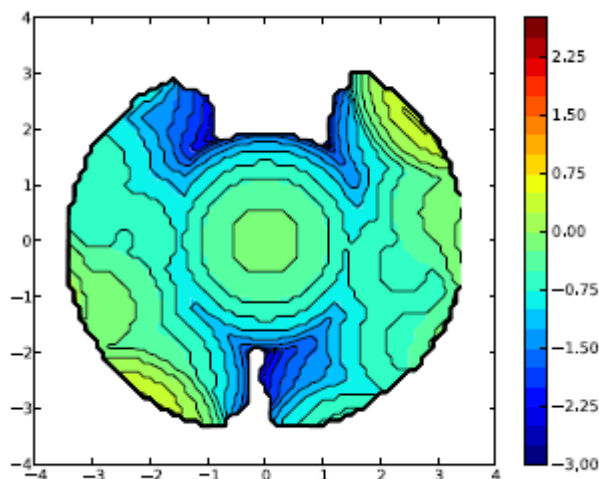

### % $V_{\text{Bur}}$ of $\text{P}(\text{Cy})_2(o\text{-biphenyl})$ in the complex $[\text{PdCl}_2(\text{IPr})\{\text{PCy}_2(o\text{-biphenyl})\}]$ (2e)

Number of atoms : 25  
Atom that is coordinated : 25  
Atoms that define the axis : 3  
ID of these atoms : 1 7 13

Radius of sphere (Angs) : 3.500  
Distance from sphere (Angs) : 2.100  
Mesh step (Angs) : 0.050  
H atoms omitted in the  $V_{\text{bur}}$  calculation

#### Cartesian coordinates from input :

|   |           |           |          |   |           |           |          |   |           |           |          |
|---|-----------|-----------|----------|---|-----------|-----------|----------|---|-----------|-----------|----------|
| C | -55.35469 | -23.98032 | 81.03696 | C | -50.02273 | -23.53634 | 80.60962 | C | -57.59245 | -24.58891 | 78.81068 |
| C | -55.30685 | -25.50879 | 81.17204 | C | -50.65397 | -22.19631 | 80.24024 | C | -58.05544 | -23.30886 | 79.03008 |
| C | -56.15339 | -25.96150 | 82.35652 | C | -52.17753 | -22.21217 | 80.41765 | C | -59.18775 | -23.07970 | 79.79003 |
| C | -55.68915 | -25.29906 | 83.63511 | C | -55.11768 | -24.39275 | 78.12517 | C | -59.88820 | -24.12384 | 80.33322 |
| C | -55.67613 | -23.78766 | 83.51414 | C | -56.42953 | -24.86870 | 77.92445 | C | -59.45148 | -25.40177 | 80.09215 |
| C | -54.82131 | -23.34039 | 82.32347 | C | -56.69089 | -25.65612 | 76.80779 | C | -58.32118 | -25.64517 | 79.34927 |
| C | -52.77708 | -23.36687 | 79.59216 | C | -55.74184 | -25.95381 | 75.86884 | P | -54.62379 | -23.26750 | 79.50251 |
| C | -52.15467 | -24.70376 | 79.99716 | C | -54.46706 | -25.47236 | 76.04203 |   |           |           |          |
| C | -50.64656 | -24.66553 | 79.82151 | C | -54.15643 | -24.71804 | 77.15119 |   |           |           |          |

#### Atoms and radius in the parameter file

|    |      |    |      |    |      |
|----|------|----|------|----|------|
| H  | 1.29 | N3 | 1.81 | P  | 2.11 |
| C2 | 1.99 | N  | 1.81 | S  | 2.10 |
| C3 | 1.99 | O  | 1.78 | Cl | 2.05 |
| C  | 1.99 | F  | 1.72 | Br | 2.16 |
| N2 | 1.81 | Si | 2.45 | I  | 2.31 |

#### Coordinates scaled to put the metal at the origin

|   |          |          |         |   |          |          |          |    |          |          |          |
|---|----------|----------|---------|---|----------|----------|----------|----|----------|----------|----------|
| C | -0.09372 | -2.69779 | 1.78726 | C | 5.23824  | -2.25381 | 1.35992  | C  | -2.33148 | -3.30638 | -0.43902 |
| C | -0.04588 | -4.22626 | 1.92234 | C | 4.60700  | -0.91378 | 0.99054  | C  | -2.79447 | -2.02633 | -0.21962 |
| C | -0.89242 | -4.67897 | 3.10682 | C | 3.08344  | -0.92964 | 1.16795  | C  | -3.92678 | -1.79717 | 0.54033  |
| C | -0.42818 | -4.01653 | 4.38541 | C | 0.14329  | -3.11022 | -1.12453 | C  | -4.62723 | -2.84131 | 1.08352  |
| C | -0.41516 | -2.50513 | 4.26444 | C | -1.16856 | -3.58617 | -1.32525 | C  | -4.19051 | -4.11924 | 0.84245  |
| C | 0.43966  | -2.05786 | 3.07377 | C | -1.42992 | -4.37359 | -2.44191 | C  | -3.06021 | -4.36264 | 0.09957  |
| C | 2.48389  | -2.08434 | 0.34246 | C | -0.48087 | -4.67128 | -3.38086 | P  | 0.63718  | -1.98497 | 0.25281  |
| C | 3.10630  | -3.42123 | 0.74746 | C | 0.79391  | -4.18983 | -3.20767 | XX | 0.00000  | 0.00000  | 0.0000   |
| C | 4.61441  | -3.38300 | 0.57181 | C | 1.10454  | -3.43551 | -2.09851 |    |          |          |          |

Results : Volumes in Angs<sup>3</sup>

N of voxels examined : 1436277  
Volume of voxel : 0.125E-03

| V Free  | V Buried | V Total | V Exact |
|---------|----------|---------|---------|
| 111.235 | 68.300   | 179.535 | 179.594 |

| %V_Free | %V_Bur | % Tot/Ex |
|---------|--------|----------|
| 61.957  | 38.043 | 99.967   |

The % $V_{\text{Bur}}$  of  $\text{PCy}_2(o\text{-biphenyl})$  is: **38.0**

**Steric map of  $\text{PCy}_2(o\text{-biphenyl})$  in the complex  $[\text{PdCl}_2(\text{IPr})\{\text{PCy}_2(o\text{-biphenyl})\}]$  (2e)**

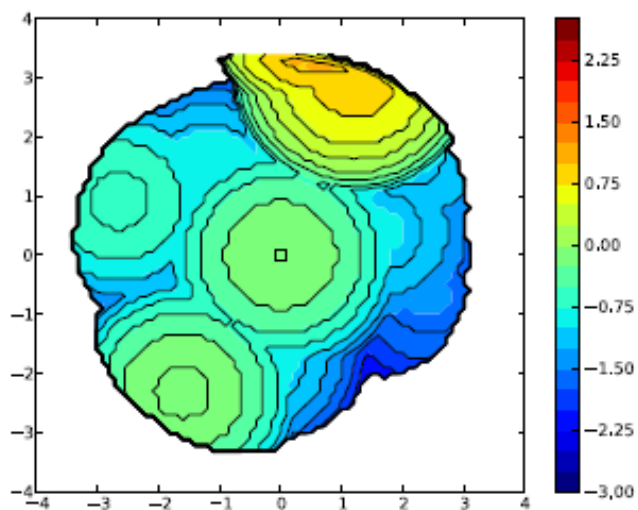

## %V<sub>Bur</sub> of IPr in the complex [PdCl<sub>2</sub>(IPr)(XPhos)] (2f)

Number of atoms : 29  
Atom that is coordinated : 1  
Atoms that define the axis : 2  
ID of these atoms : 28 29

Radius of sphere (Angs) : 3.500  
Distance from sphere (Angs) : 2.100  
Mesh step (Angs) : 0.050  
H atoms omitted in the V<sub>Bur</sub> calculation

### Cartesian coordinates from input :

|   |           |          |          |   |           |          |          |   |           |          |          |
|---|-----------|----------|----------|---|-----------|----------|----------|---|-----------|----------|----------|
| C | -51.95100 | 30.63500 | 12.43200 | C | -49.90900 | 32.61500 | 16.11700 | C | -55.11800 | 31.16100 | 12.68000 |
| C | -50.91600 | 32.59300 | 12.75600 | C | -50.78400 | 30.41000 | 16.93800 | C | -53.43500 | 32.10600 | 9.32500  |
| C | -52.15400 | 32.87100 | 12.32900 | C | -48.90400 | 30.00300 | 10.98500 | C | -53.49300 | 33.61400 | 9.13700  |
| C | -49.63800 | 30.54500 | 13.36500 | C | -48.49500 | 31.37800 | 10.44300 | C | -53.60100 | 31.42000 | 7.97100  |
| C | -49.47700 | 30.55200 | 14.76000 | C | -48.13900 | 28.90500 | 10.24400 | C | -54.78700 | 31.13200 | 14.16400 |
| C | -48.34200 | 29.92500 | 15.27200 | C | -54.16700 | 31.47800 | 11.70800 | C | -54.84000 | 32.55800 | 14.74000 |
| C | -47.43800 | 29.30800 | 14.43300 | C | -54.47300 | 31.64900 | 10.35800 | C | -55.68100 | 30.21500 | 14.98800 |
| C | -47.62400 | 29.30900 | 13.06800 | C | -55.80800 | 31.43200 | 9.97200  | N | -50.80000 | 31.22600 | 12.82100 |
| C | -48.72100 | 29.94100 | 12.48400 | C | -56.75000 | 31.08000 | 10.89600 | N | -52.78900 | 31.64500 | 12.13000 |
| C | -50.45000 | 31.25200 | 15.69600 | C | -56.42100 | 30.94700 | 12.22200 |   |           |          |          |

### Atoms and radius in the parameter file

|    |      |    |      |    |      |
|----|------|----|------|----|------|
| H  | 1.29 | N3 | 1.81 | P  | 2.11 |
| C2 | 1.99 | N  | 1.81 | S  | 2.10 |
| C3 | 1.99 | O  | 1.78 | Cl | 2.05 |
| C  | 1.99 | F  | 1.72 | Br | 2.16 |
| N2 | 1.81 | Si | 2.45 |    |      |

### Coordinates scaled to put the metal at the origin

|   |         |         |         |   |          |         |          |    |          |         |          |
|---|---------|---------|---------|---|----------|---------|----------|----|----------|---------|----------|
| C | 0.40236 | 2.05806 | 0.11184 | C | 2.44436  | 4.03806 | 3.79684  | C  | -2.76464 | 2.58406 | 0.35984  |
| C | 1.43736 | 4.01606 | 0.43584 | C | 1.56936  | 1.83306 | 4.61784  | C  | -1.08164 | 3.52906 | -2.99516 |
| C | 0.19936 | 4.29406 | 0.00884 | C | 3.44936  | 1.42606 | -1.33516 | C  | -1.13964 | 5.03706 | -3.18316 |
| C | 2.71536 | 1.96806 | 1.04484 | C | 3.85836  | 2.80106 | -1.87716 | C  | -1.24764 | 2.84306 | -4.34916 |
| C | 2.87636 | 1.97506 | 2.43984 | C | 4.21436  | 0.32806 | -2.07616 | C  | -2.43364 | 2.55506 | 1.84384  |
| C | 4.01136 | 1.34806 | 2.95184 | C | -1.81364 | 2.90106 | -0.61216 | C  | -2.48664 | 3.98106 | 2.41984  |
| C | 4.91536 | 0.73106 | 2.11284 | C | -2.11964 | 3.07206 | -1.96216 | C  | -3.32764 | 1.63806 | 2.66784  |
| C | 4.72936 | 0.73206 | 0.74784 | C | -3.45464 | 2.85506 | -2.34816 | N  | 1.55336  | 2.64906 | 0.50084  |
| C | 3.63236 | 1.36406 | 0.16384 | C | -4.39664 | 2.50306 | -1.42416 | N  | -0.43564 | 3.06806 | -0.19016 |
| C | 1.90336 | 2.67506 | 3.37584 | C | -4.06764 | 2.37006 | -0.09816 | XX | 0.00000  | 0.00000 | 0.00000  |

### Results : Volumes in Angs<sup>3</sup>

N of voxels examined : 1436277  
Volume of voxel : 0.125E-03

| V Free  | V Buried | V Total | V Exact |
|---------|----------|---------|---------|
| 118.768 | 60.767   | 179.535 | 179.594 |

| %V <sub>Free</sub> | %V <sub>Bur</sub> | % Tot/Ex |
|--------------------|-------------------|----------|
| 66.153             | 33.847            | 99.967   |

The %V<sub>Bur</sub> of IPr is: **33.8**

## Steric map of IPr in the complex $[\text{PdCl}_2(\text{IPr})(\text{XPhos})]$ (2f)

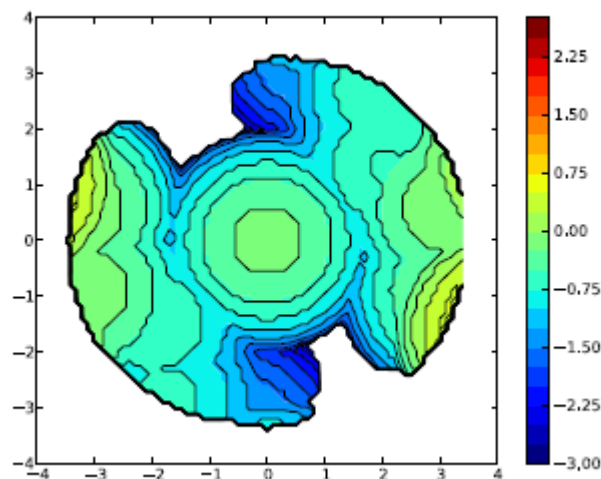

## % $V_{\text{Bur}}$ of XPhos in the complex $[\text{PdCl}_2(\text{IPr})(\text{XPhos})]$ (2f)

Number of atoms : 34  
Atom that is coordinated : 34  
Atoms that define the axis : 3  
ID of these atoms : 1 7 13

Radius of sphere (Angs) : 3.500  
Distance from sphere (Angs) : 2.100  
Mesh step (Angs) : 0.050  
H atoms omitted in the  $V_{\text{bur}}$  calculation

Cartesian coordinates from input :

|                               |                               |                               |
|-------------------------------|-------------------------------|-------------------------------|
| C -54.64900 26.10400 12.07300 | C -52.16700 25.63000 10.42700 | C -54.51500 26.71400 7.94600  |
| C -55.34900 27.33200 11.46400 | C -52.76900 24.81000 9.43800  | C -55.54900 27.81300 7.83100  |
| C -56.87400 27.13300 11.42700 | C -51.92800 24.24700 8.45300  | C -53.92800 26.42100 6.56700  |
| C -57.41000 26.85700 12.82100 | C -50.56600 24.46800 8.42100  | C -58.44900 23.60700 8.78600  |
| C -56.69800 25.67900 13.47200 | C -49.98700 25.32200 9.34600  | C -59.22300 24.34600 9.88400  |
| C -55.17600 25.87400 13.50400 | C -50.78700 25.89800 10.31300 | C -59.04000 23.89600 7.41400  |
| C -52.08400 25.33200 13.30600 | C -54.24300 24.52000 9.26900  | C -53.88500 22.21300 10.35500 |
| C -52.27900 23.82500 13.09200 | C -55.06400 25.43100 8.56600  | C -54.55700 21.60200 11.60000 |
| C -51.82600 23.03200 14.33500 | C -56.41100 25.09000 8.39100  | C -53.53700 21.11400 9.35000  |
| C -50.38100 23.35400 14.68600 | C -56.95100 23.90900 8.88300  | P -52.82700 26.37300 11.97000 |
| C -50.17100 24.86500 14.83700 | C -56.10900 23.02100 9.50500  |                               |
| C -50.61300 25.64000 13.59200 | C -54.75800 23.29000 9.69600  |                               |

Atoms and radius in the parameter file

|         |         |         |
|---------|---------|---------|
| H 1.29  | N3 1.81 | P 2.11  |
| C2 1.99 | N 1.81  | S 2.10  |
| C3 1.99 | O 1.78  | Cl 2.05 |
| C 1.99  | F 1.72  | Br 2.16 |
| N2 1.81 | Si 2.45 |         |

Coordinates scaled to put the metal at the origin

|                              |                            |                              |
|------------------------------|----------------------------|------------------------------|
| C -2.24142 -2.32405 -0.00110 | C 0.32358 -3.09605 1.23190 | C 0.24058 -2.79805 -1.64710  |
| C -2.94142 -1.09605 -0.61010 | C 0.12858 -4.60305 1.01790 | C -0.36142 -3.61805 -2.63610 |
| C -4.46642 -1.29505 -0.64710 | C 0.58158 -5.39605 2.26090 | C 0.47958 -4.18105 -3.62110  |
| C -5.00242 -1.57105 0.74690  | C 2.02658 -5.07405 2.61190 | C 1.84158 -3.96005 -3.65310  |
| C -4.29042 -2.74905 1.39790  | C 2.23658 -3.56305 2.76290 | C 2.42058 -3.10605 -2.72810  |
| C -2.76842 -2.55405 1.42990  | C 1.79458 -2.78805 1.51790 | C 1.62058 -2.53005 -1.76110  |



|   |          |          |          |   |          |          |          |    |          |          |          |
|---|----------|----------|----------|---|----------|----------|----------|----|----------|----------|----------|
| C | -1.83542 | -3.90805 | -2.80510 | C | -2.10742 | -1.71405 | -4.12810 | C  | -1.47742 | -6.21505 | -1.71910 |
| C | -2.65642 | -2.99705 | -3.50810 | C | -3.14142 | -0.61505 | -4.24310 | C  | -2.14942 | -6.82605 | -0.47410 |
| C | -4.00342 | -3.33805 | -3.68310 | C | -1.52042 | -2.00705 | -5.50710 | C  | -1.12942 | -7.31405 | -2.72410 |
| C | -4.54342 | -4.51905 | -3.19110 | C | -6.04142 | -4.82105 | -3.28810 | P  | -0.41942 | -2.05505 | -0.10410 |
| C | -3.70142 | -5.40705 | -2.56910 | C | -6.81542 | -4.08205 | -2.19010 | XX | 0.00000  | 0.00000  | 0.00000  |
| C | -2.35042 | -5.13805 | -2.37810 | C | -6.63242 | -4.53205 | -4.66010 |    |          |          |          |

Results : Volumes in Angs<sup>3</sup>

N of voxels examined : 1436277  
Volume of voxel : 0.125E-03

| V Free  | V Buried | V Total | V Exact |
|---------|----------|---------|---------|
| 114.484 | 65.050   | 179.535 | 179.594 |

| %V_Free | %V_Bur | % Tot/Ex |
|---------|--------|----------|
| 63.767  | 36.233 | 99.967   |

The %V<sub>Bur</sub> of XPhos is: **36.2**

### Steric map of XPhos in the complex [PdCl<sub>2</sub>(IPr)(XPhos)] (2f)

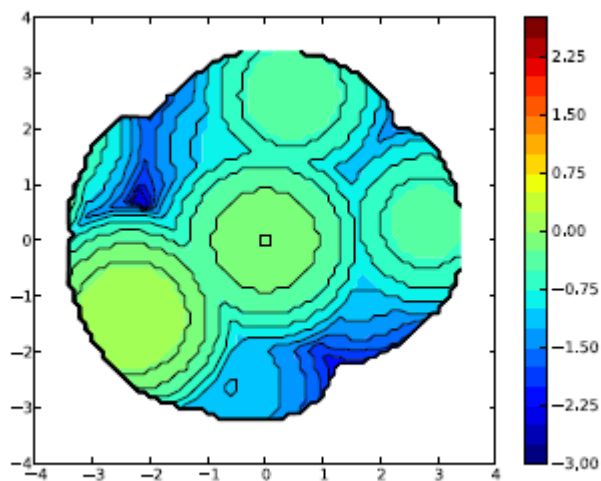

## %V<sub>Bur</sub> of IPr in the complex [PdCl<sub>2</sub>(IPr)(SPhos)] (2g)

Number of atoms : 29  
Atom that is coordinated : 1  
Atoms that define the axis : 2  
ID of these atoms : 28 29

Radius of sphere (Angs) : 3.500  
Distance from sphere (Angs) : 2.100  
Mesh step (Angs) : 0.050  
H atoms omitted in the V<sub>Bur</sub> calculation

### Cartesian coordinates from input :

|   |          |          |          |   |          |          |          |   |          |          |          |
|---|----------|----------|----------|---|----------|----------|----------|---|----------|----------|----------|
| C | 23.18300 | 82.64000 | 11.32200 | C | 21.14000 | 82.20000 | 7.27100  | C | 26.22200 | 83.80800 | 10.47400 |
| C | 22.11200 | 84.60300 | 11.63000 | C | 20.89100 | 84.51300 | 8.25300  | C | 25.32000 | 83.06900 | 14.14700 |
| C | 23.41600 | 84.83400 | 11.81700 | C | 20.24400 | 82.49700 | 13.51700 | C | 25.86200 | 81.82800 | 14.88800 |
| C | 20.71000 | 82.65100 | 11.01000 | C | 19.84900 | 81.33300 | 14.42300 | C | 25.36500 | 84.28900 | 15.04100 |
| C | 20.35000 | 82.51300 | 9.66800  | C | 19.60800 | 83.79100 | 14.05200 | C | 25.52800 | 83.99100 | 9.14800  |
| C | 19.11400 | 81.93800 | 9.40100  | C | 25.50700 | 83.54000 | 11.65700 | C | 26.34400 | 83.49000 | 7.95800  |
| C | 18.26800 | 81.54000 | 10.41600 | C | 26.10500 | 83.34500 | 12.89700 | C | 25.11500 | 85.45400 | 8.87700  |
| C | 18.64200 | 81.71600 | 11.72900 | C | 27.52800 | 83.46300 | 12.91700 | N | 21.98000 | 83.26200 | 11.32800 |
| C | 19.87200 | 82.27100 | 12.06600 | C | 28.21300 | 83.75300 | 11.76000 | N | 24.06400 | 83.62600 | 11.59600 |
| C | 21.22700 | 83.03600 | 8.53900  | C | 27.59000 | 83.92800 | 10.57100 |   |          |          |          |

### Atoms and radius in the parameter file

|    |      |    |      |    |      |
|----|------|----|------|----|------|
| H  | 1.29 | N3 | 1.81 | P  | 2.11 |
| C2 | 1.99 | N  | 1.81 | S  | 2.10 |
| C3 | 1.99 | O  | 1.78 | Cl | 2.05 |
| C  | 1.99 | F  | 1.72 | Br | 2.16 |
| N2 | 1.81 | Si | 2.45 |    |      |

### Coordinates scaled to put the metal at the origin

|   |          |         |          |   |          |         |          |    |          |         |          |
|---|----------|---------|----------|---|----------|---------|----------|----|----------|---------|----------|
| C | -0.40645 | 2.02975 | 0.35344  | C | -2.44945 | 1.58975 | -3.69756 | C  | 2.63255  | 3.19775 | -0.49456 |
| C | -1.47745 | 3.99275 | 0.66144  | C | -2.69845 | 3.90275 | -2.71556 | C  | 1.73055  | 2.45875 | 3.17844  |
| C | -0.17345 | 4.22375 | 0.84844  | C | -3.34545 | 1.88675 | 2.54844  | C  | 2.27255  | 1.21775 | 3.91944  |
| C | -2.87945 | 2.04075 | 0.04144  | C | -3.74045 | 0.72275 | 3.45444  | C  | 1.77555  | 3.67875 | 4.07244  |
| C | -3.23945 | 1.90275 | -1.30056 | C | -3.98145 | 3.18075 | 3.08344  | C  | 1.93855  | 3.38075 | -1.82056 |
| C | -4.47545 | 1.32775 | -1.56756 | C | 1.91755  | 2.92975 | 0.68844  | C  | 2.75455  | 2.87975 | -3.01056 |
| C | -5.32145 | 0.92975 | -0.55256 | C | 2.51555  | 2.73475 | 1.92844  | C  | 1.52555  | 4.84375 | -2.09156 |
| C | -4.94745 | 1.10575 | 0.76044  | C | 3.93855  | 2.85275 | 1.94844  | N  | -1.60945 | 2.65175 | 0.35944  |
| C | -3.71745 | 1.66075 | 1.09744  | C | 4.62355  | 3.14275 | 0.79144  | N  | 0.47455  | 3.01575 | 0.62744  |
| C | -2.36245 | 2.42575 | -2.42956 | C | 4.00055  | 3.31775 | -0.39756 | XX | 0.00000  | 0.00000 | 0.00000  |

### Results : Volumes in Angs<sup>3</sup>

N of voxels examined : 1436277  
Volume of voxel : 0.125E-03

|         |          |         |         |
|---------|----------|---------|---------|
| V Free  | V Buried | V Total | V Exact |
| 121.493 | 58.042   | 179.535 | 179.594 |

|                    |                   |          |
|--------------------|-------------------|----------|
| %V <sub>Free</sub> | %V <sub>Bur</sub> | % Tot/Ex |
| 67.671             | 32.329            | 99.967   |

The %V<sub>Bur</sub> of IPr is: **32.3**

### Steric map of IPr in the complex [PdCl<sub>2</sub>(IPr)(SPhos)] (2g)

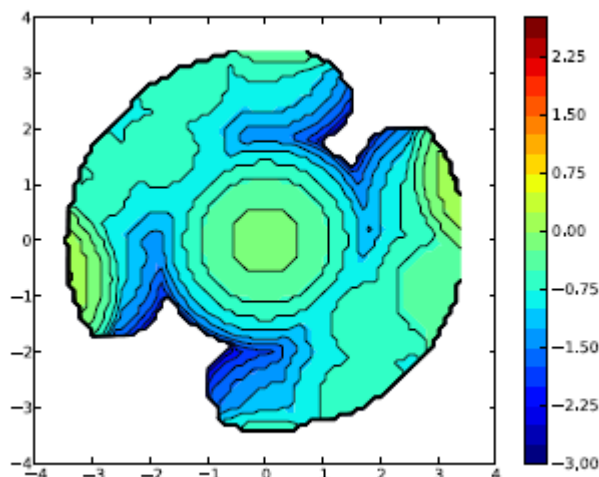

### %V<sub>Bur</sub> of SPhos in the complex [PdCl<sub>2</sub>(IPr)(SPhos)] (2g)

Number of atoms : 29  
Atom that is coordinated : 29  
Atoms that define the axis : 3  
ID of these atoms : 1 7 13

Radius of sphere (Angs) : 3.500  
Distance from sphere (Angs) : 2.100  
Mesh step (Angs) : 0.050  
H atoms omitted in the V<sub>bur</sub> calculation

#### Cartesian coordinates from input :

|   |          |          |          |   |          |          |         |   |          |          |          |
|---|----------|----------|----------|---|----------|----------|---------|---|----------|----------|----------|
| C | 24.10300 | 77.38600 | 12.30100 | C | 19.96400 | 78.13100 | 8.83300 | C | 22.29700 | 74.00200 | 8.25500  |
| C | 25.45300 | 77.81500 | 12.89000 | C | 21.33200 | 78.64400 | 9.27300 | C | 21.48000 | 74.52700 | 7.28000  |
| C | 25.68200 | 77.12000 | 14.23000 | C | 24.92100 | 77.78900 | 9.54100 | C | 21.74500 | 75.73700 | 6.67800  |
| C | 25.62900 | 75.60300 | 14.08000 | C | 24.87300 | 76.80100 | 8.54700 | C | 22.84900 | 76.48300 | 7.11600  |
| C | 24.31100 | 75.17200 | 13.49000 | C | 26.02900 | 76.53200 | 7.81200 | C | 24.11700 | 73.02800 | 10.20100 |
| C | 24.05200 | 75.86400 | 12.14900 | C | 27.22200 | 77.21100 | 8.02600 | C | 22.34400 | 78.30700 | 5.65100  |
| C | 21.96800 | 77.70800 | 10.29900 | C | 27.26600 | 78.19800 | 8.98000 | O | 24.35900 | 74.26600 | 9.52400  |
| C | 21.04200 | 77.57100 | 11.51600 | C | 26.13200 | 78.49100 | 9.72100 | O | 23.21900 | 77.67800 | 6.58400  |
| C | 19.68200 | 77.02700 | 11.06700 | C | 23.67300 | 76.01000 | 8.13400 | P | 23.65100 | 78.31800 | 10.77400 |
| C | 19.04500 | 77.91700 | 10.01100 | C | 23.42700 | 74.73800 | 8.65100 |   |          |          |          |

#### Atoms and radius in the parameter file

|    |      |    |      |    |      |
|----|------|----|------|----|------|
| H  | 1.29 | N3 | 1.81 | P  | 2.11 |
| C2 | 1.99 | N  | 1.81 | S  | 2.10 |
| C3 | 1.99 | O  | 1.78 | Cl | 2.05 |
| C  | 1.99 | F  | 1.72 | Br | 2.16 |
| N2 | 1.81 | Si | 2.45 |    |      |

#### Coordinates scaled to put the metal at the origin

|   |          |          |          |   |          |          |          |    |          |          |          |
|---|----------|----------|----------|---|----------|----------|----------|----|----------|----------|----------|
| C | 0.49139  | -3.02366 | 1.34419  | C | -3.64761 | -2.27866 | -2.12381 | C  | -1.31461 | -6.40766 | -2.70181 |
| C | 1.84139  | -2.59466 | 1.93319  | C | -2.27961 | -1.76566 | -1.68381 | C  | -2.13161 | -5.88266 | -3.67681 |
| C | 2.07039  | -3.28966 | 3.27319  | C | 1.30939  | -2.62066 | -1.41581 | C  | -1.86661 | -4.67266 | -4.27881 |
| C | 2.01739  | -4.80666 | 3.12319  | C | 1.26139  | -3.60866 | -2.40981 | C  | -0.76261 | -3.92666 | -3.84081 |
| C | 0.69939  | -5.23766 | 2.53319  | C | 2.41739  | -3.87766 | -3.14481 | C  | 0.50539  | -7.38166 | -0.75581 |
| C | 0.44039  | -4.54566 | 1.19219  | C | 3.61039  | -3.19866 | -2.93081 | C  | -1.26761 | -2.10266 | -5.30581 |
| C | -1.64361 | -2.70166 | -0.65781 | C | 3.65439  | -2.21166 | -1.97681 | O  | 0.74739  | -6.14366 | -1.43281 |
| C | -2.56961 | -2.83866 | 0.55919  | C | 2.52039  | -1.91866 | -1.23581 | O  | -0.39261 | -2.73166 | -4.37281 |
| C | -3.92961 | -3.38266 | 0.11019  | C | 0.06139  | -4.39966 | -2.82281 | P  | 0.03939  | -2.09166 | -0.18281 |
| C | -4.56661 | -2.49266 | -0.94581 | C | -0.18461 | -5.67166 | -2.30581 | XX | 0.00000  | 0.00000  | 0.00000  |

Results : Volumes in Angs<sup>3</sup>

N of voxels examined : 1436277  
Volume of voxel : 0.125E-03

| V Free  | V Buried | V Total | V Exact |
|---------|----------|---------|---------|
| 115.621 | 63.913   | 179.535 | 179.594 |

| %V_Free | %V_Bur | % Tot/Ex |
|---------|--------|----------|
| 64.401  | 35.599 | 99.967   |

The %V<sub>Bur</sub> of *SPhos* is: **35.6**

### Steric map of *SPhos* in the complex [PdCl<sub>2</sub>(IPr)(*SPhos*)] (2g)

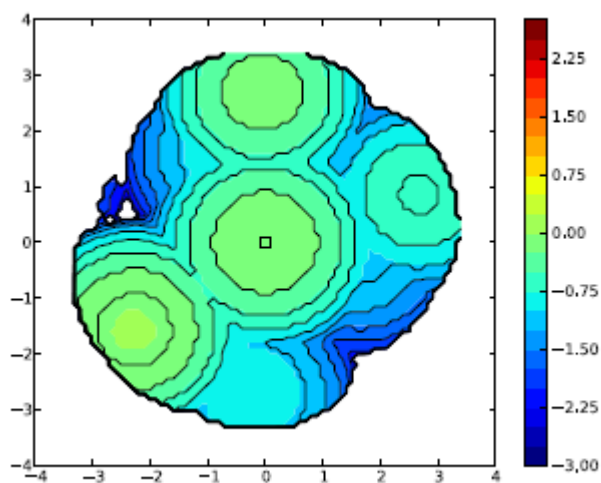

## %V<sub>Bur</sub> of IPr [Pd(IPr)(SPhos)] (6)

Number of atoms : 29  
Atom that is coordinated : 1  
Atoms that define the axis : 2  
ID of these atoms : 28 29

Radius of sphere (Angs) : 3.500  
Distance from sphere (Angs) : 2.100  
Mesh step (Angs) : 0.050  
H atoms omitted in the V<sub>bur</sub> calculation

### Cartesian coordinates from input :

|   |         |          |           |   |         |          |           |   |         |          |           |
|---|---------|----------|-----------|---|---------|----------|-----------|---|---------|----------|-----------|
| C | 5.15500 | 39.13900 | -62.43100 | C | 2.92800 | 42.41100 | -65.44500 | C | 8.33100 | 38.78300 | -63.36000 |
| C | 5.15100 | 41.36600 | -61.85800 | C | 3.55600 | 39.98200 | -65.90800 | C | 7.04000 | 37.90000 | -59.83700 |
| C | 6.41600 | 40.94800 | -61.75300 | C | 2.73900 | 39.70600 | -59.96100 | C | 7.83800 | 38.24900 | -58.58100 |
| C | 2.96400 | 40.29400 | -62.43800 | C | 1.91300 | 40.29300 | -58.85400 | C | 6.36200 | 36.54200 | -59.66900 |
| C | 2.48200 | 40.63700 | -63.68600 | C | 2.96300 | 38.19800 | -59.76200 | C | 7.87900 | 39.59800 | -64.56100 |
| C | 1.08800 | 40.55900 | -63.86900 | C | 7.58100 | 38.74900 | -62.19300 | C | 9.04600 | 40.31200 | -65.22500 |
| C | 0.26400 | 40.17300 | -62.83200 | C | 7.88900 | 37.94200 | -61.08100 | C | 7.15000 | 38.67000 | -65.54000 |
| C | 0.77900 | 39.91500 | -61.58800 | C | 9.02100 | 37.13400 | -61.19300 | N | 4.40100 | 40.26700 | -62.24000 |
| C | 2.15300 | 39.97300 | -61.35900 | C | 9.80300 | 37.14800 | -62.34700 | N | 6.40800 | 39.60500 | -62.09000 |
| C | 3.39200 | 41.08600 | -64.82100 | C | 9.45700 | 37.95400 | -63.41100 |   |         |          |           |

### Atoms and radius in the parameter file

|    |      |    |      |    |      |
|----|------|----|------|----|------|
| H  | 1.29 | N3 | 1.81 | P  | 2.11 |
| C2 | 1.99 | N  | 1.81 | S  | 2.10 |
| C3 | 1.99 | O  | 1.78 | Cl | 2.05 |
| C  | 1.99 | F  | 1.72 | Br | 2.16 |
| N2 | 1.81 | Si | 2.45 |    |      |

### Coordinates scaled to put the metal at the origin

|   |          |         |          |   |          |          |          |    |          |          |          |
|---|----------|---------|----------|---|----------|----------|----------|----|----------|----------|----------|
| C | 0.59779  | 1.90957 | 0.63732  | C | -1.00121 | 2.75257  | -2.83968 | C  | 3.28079  | 1.01957  | 4.48732  |
| C | 0.59379  | 4.13657 | 1.21032  | C | -1.81821 | 2.47657  | 3.10732  | C  | 1.80479  | -0.68743 | 3.39932  |
| C | 1.85879  | 3.71857 | 1.31532  | C | -2.64421 | 3.06357  | 4.21432  | C  | 3.32179  | 2.36857  | -1.49268 |
| C | -1.59321 | 3.06457 | 0.63032  | C | -1.59421 | 0.96857  | 3.30632  | C  | 4.48879  | 3.08257  | -2.15668 |
| C | -2.07521 | 3.40757 | -0.61768 | C | 3.02379  | 1.51957  | 0.87532  | C  | 2.59279  | 1.44057  | -2.47168 |
| C | -3.46921 | 3.32957 | -0.80068 | C | 3.33179  | 0.71257  | 1.98732  | N  | -0.15621 | 3.03757  | 0.82832  |
| C | -4.29321 | 2.94357 | 0.23632  | C | 4.46379  | -0.09543 | 1.87532  | N  | 1.85079  | 2.37557  | 0.97832  |
| C | -3.77821 | 2.68557 | 1.48032  | C | 5.24579  | -0.08143 | 0.72132  | XX | 0.00000  | 0.00000  | 0.00000  |
| C | -2.40421 | 2.74357 | 1.70932  | C | 4.89979  | 0.72457  | -0.34268 |    |          |          |          |
| C | -1.16521 | 3.85657 | -1.75268 | C | 3.77379  | 1.55357  | -0.29168 |    |          |          |          |
| C | -1.62921 | 5.18157 | -2.37668 | C | 2.48279  | 0.67057  | 3.23132  |    |          |          |          |

### Results : Volumes in Angs<sup>3</sup>

N of voxels examined : 1436277  
Volume of voxel : 0.125E-03

V Free V Buried V Total V Exact  
100.743 78.791 179.535 179.594

%V<sub>Free</sub> %V<sub>Bur</sub> % Tot/Ex  
56.114 43.886 99.967

The %V<sub>Bur</sub> of IPr is: **43.9**

## Steric map of IPr [Pd(IPr)(SPhos)] (6)

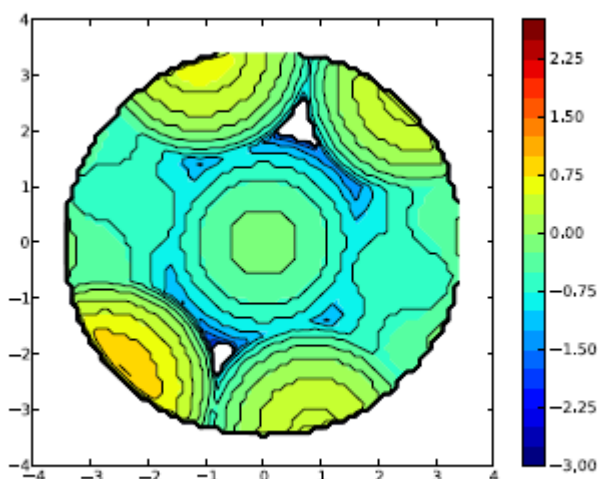

## % $V_{\text{Bur}}$ of SPhos of [Pd(IPr)(SPhos)] (6)

Number of atoms : 29  
Atom that is coordinated : 29  
Atoms that define the axis : 3  
ID of these atoms : 1 7 13

Radius of sphere (Angs) : 3.500  
Distance from sphere (Angs) : 2.100  
Mesh step (Angs) : 0.050  
H atoms omitted in the  $V_{\text{bur}}$  calculation

### Cartesian coordinates from input :

|   |         |          |           |   |         |          |           |   |         |          |           |
|---|---------|----------|-----------|---|---------|----------|-----------|---|---------|----------|-----------|
| C | 3.23500 | 34.05700 | -62.90000 | C | 7.74200 | 32.79600 | -62.62300 | C | 6.56600 | 31.60700 | -67.01600 |
| C | 1.80300 | 34.28500 | -63.38200 | C | 6.44300 | 33.60200 | -62.48800 | C | 5.98000 | 30.48200 | -66.44300 |
| C | 0.81800 | 33.40200 | -62.60900 | C | 3.77600 | 35.15100 | -65.51300 | C | 4.70600 | 30.52000 | -65.93900 |
| C | 0.89800 | 33.64800 | -61.12500 | C | 3.80700 | 34.17400 | -66.52600 | C | 3.99400 | 31.71400 | -65.97200 |
| C | 2.31000 | 33.45400 | -60.59500 | C | 3.06900 | 34.36200 | -67.67600 | C | 7.60200 | 33.92600 | -68.22900 |
| C | 3.30500 | 34.30900 | -61.38900 | C | 2.29200 | 35.48700 | -67.88200 | C | 1.96000 | 30.62100 | -65.37200 |
| C | 6.01000 | 34.14900 | -63.84300 | C | 2.25100 | 36.46100 | -66.91100 | O | 6.32100 | 33.95900 | -67.57500 |
| C | 7.13700 | 35.01200 | -64.43700 | C | 2.98900 | 36.31100 | -65.75200 | O | 2.71200 | 31.83900 | -65.52000 |
| C | 8.46200 | 34.22400 | -64.56100 | C | 4.58400 | 32.87600 | -66.48200 | P | 4.45800 | 35.15900 | -63.78300 |
| C | 8.86700 | 33.64600 | -63.20500 | C | 5.85400 | 32.79400 | -67.03300 |   |         |          |           |

### Atoms and radius in the parameter file

|    |      |    |      |    |      |
|----|------|----|------|----|------|
| H  | 1.29 | N3 | 1.81 | P  | 2.11 |
| C2 | 1.99 | N  | 1.81 | S  | 2.10 |
| C3 | 1.99 | O  | 1.78 | Cl | 2.05 |
| C  | 1.99 | F  | 1.72 | Br | 2.16 |
| N2 | 1.81 | Si | 2.45 |    |      |

### Coordinates scaled to put the metal at the origin

|   |          |          |          |   |          |          |          |    |          |          |          |
|---|----------|----------|----------|---|----------|----------|----------|----|----------|----------|----------|
| C | -1.54078 | -3.01049 | 0.06649  | C | 1.66722  | -3.46549 | 0.47849  | C  | -0.06978 | -6.54749 | -2.97251 |
| C | -2.97278 | -2.78249 | -0.41551 | C | -0.99978 | -1.91649 | -2.54651 | C  | -0.78178 | -5.35349 | -3.00551 |
| C | -3.95778 | -3.66549 | 0.35749  | C | -0.96878 | -2.89349 | -3.55951 | C  | 2.82622  | -3.14149 | -5.26251 |
| C | -3.87778 | -3.41949 | 1.84149  | C | -1.70678 | -2.70549 | -4.70951 | C  | -2.81578 | -6.44649 | -2.40551 |
| C | -2.46578 | -3.61349 | 2.37149  | C | -2.48378 | -1.58049 | -4.91551 | O  | 1.54522  | -3.10849 | -4.60851 |
| C | -1.47078 | -2.75849 | 1.57749  | C | -2.52478 | -0.60649 | -3.94451 | O  | -2.06378 | -5.22849 | -2.55351 |
| C | 1.23422  | -2.91849 | -0.87651 | C | -1.78678 | -0.75649 | -2.78551 | P  | -0.31778 | -1.90849 | -0.81651 |
| C | 2.36122  | -2.05549 | -1.47051 | C | -0.19178 | -4.19149 | -3.51551 | XX | 0.00000  | 0.00000  | 0.00000  |
| C | 3.68622  | -2.84349 | -1.59451 | C | 1.07822  | -4.27349 | -4.06651 |    |          |          |          |
| C | 4.09122  | -3.42149 | -0.23851 | C | 1.79022  | -5.46049 | -4.04951 |    |          |          |          |
| C | 2.96622  | -4.27149 | 0.34349  | C | 1.20422  | -6.58549 | -3.47651 |    |          |          |          |

Results : Volumes in Angs<sup>3</sup>

N of voxels examined : 1436277  
Volume of voxel : 0.125E-03

| V Free  | V Buried | V Total | V Exact |
|---------|----------|---------|---------|
| 114.350 | 65.184   | 179.535 | 179.594 |

| %V_Free | %V_Bur | % Tot/Ex |
|---------|--------|----------|
| 63.693  | 36.307 | 99.967   |

The %V<sub>Bur</sub> of *SPhos* is: **36.3**

### Steric map of SPhos of [Pd(IPr)(SPhos)] (6)

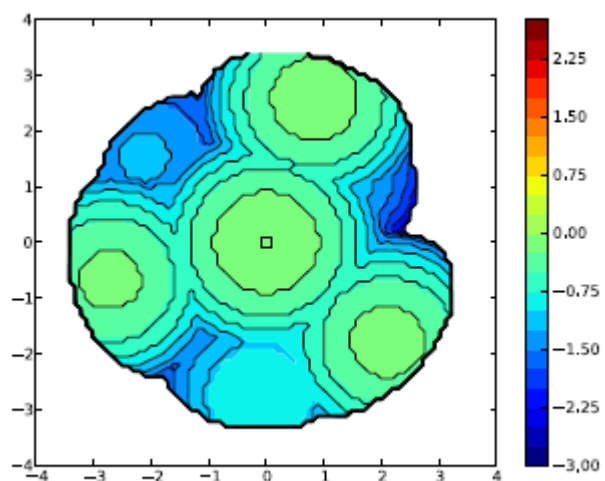

## References

- (1) I. J. S. Fairlamb, A. R. Kapdi, and A. F. Lee, *Org. Lett.*, 2004, **6**, 4435.
- (2) O. Diebolt, P. Braunstein, S. P. Nolan and C. S. J. Cazin, *Chem. Commun.* 2008, 3190.
- (3) B. Lü, C. Fu, and S. Ma, *Tetrahedron Lett.*, 2010, **51**, 1284.
- (4) J. P. Wolfe, R. A. Singer, B. H. Yang, L. Stephen and S. L. Buchwald, *J. Am. Chem. Soc.* 1999, **121**, 9550.
- (5) G. Li, S. Zhou, G. Su, Y. Liu and P. G. Wang, *J. Org. Chem.*, 2007, **72**, 9830.
- (6) X. Bei, H. W. Turner, W. H. Weinberg and A. S. Guram, *J. Org. Chem.*, 1999, **64**, 6797.
- (7) K. W. Anderson and S. L. Buchwald, *Angew. Chem. Int. Ed.*, 2005, **44**, 6173.
- (8) C. E. Hartmann, S. P. Nolan and C. S. J. Cazin, *Organometallics*, 2009, **28**, 2915.
- (9) T. Kamikawa and T. Hayashi, *Synlett*, 1997, **2**, 163.
- (10) J. M. A. Miguez; L. A. Adrio; A. Sousa-Pedrares; J. M. Vila; K. K. Hii, *J. Org. Chem.*, 2007, **72**, 7771.
- (11) S. Vuoti, J. Autio, M. Laitila, M. Haukka and J. Pursiainen, *Eur. J. Inorg. Chem.*, 2008, 397.
- (12) T. Hoshi, I. Saitoh, T. Nakazawa, T. Suzuki, J.-I. Sakai and H. Hagiwara, *J. Org. Chem.*, 2009, **74**, 4013.
- (13) A. Núñez, A. Sánchez, C. Burgos and J. Alvarez-Builla, *Tetrahedron*, 2004, **60**, 6217.
- (14) O. Diebolt, V. Jurcik, R. Correa da Costa, P. Braunstein, L. Cavallo, S. P. Nolan, A. M. Z., Slawin and C. S. J. Cazin, *Organometallics*, 2010, **29**, 1443.
- (15) F.-Y. Tsaia, B.-N. Lina, M.-J. Chena, C.-Y. Moub and S.-Y. Liu, *Tetrahedron*, 2007, **63**, 4304.
- (16) N. Kataoka, Q. Shelby, J. P. Stambuli and J. F. Hartwig, *Org. Chem.* 2002, **67**, 5553.



- (17) (a) A. Poater, B. Cosenza, A. Correa, S. Giudice, F. Ragone, V. Scarano and L. Cavallo, *Eur. J. Inorg. Chem.* 2009, 1759. (b) L. Cavallo, A. Correa, C. Costabile and H. Jacobsen, *J. Organomet. Chem.*, 2005, **690**, 5407. (c) A. Poater, F. Ragone, S. Giudice, C. Costabile, R. Dorta, S. P. Nolan and L. Cavallo, *Organometallics*, 2008, **27**, 2679. (d) A. Poater and L. Cavallo, *Dalton Trans.*, 2009, 8878. (e) A. Poater, F. Ragone, R. Mariz, R. Dorta and L. Cavallo, *Chem.Eur. J.*, 2010, **16**, 14348. (f) F. Ragone, A. Poater and L. Cavallo, *J. Am. Chem. Soc.*, 2010, **132**, 4249.
- (18) A. Bondi, *J. Phys. Chem.*, 1964, **68**, 441.
